# Supplementary material for: Task-specific boronium ionic liquids as ashless lubricant additives
Source: Royal Society of Chemistry journal article supplement (doi:10.1039/d4su00451e), 2024-01-01
Supplement: d4su00451e1.pdf [file d4su00451e1.pdf]

## Task-Specific Boronium Ionic Liquids as Ashless Lubricant Additives

Novina Malviya,<sup>a</sup> Farah Fazlina M Yasin,<sup>b</sup> Maria Teresa Sateriale,<sup>c</sup> Fergal Coleman,<sup>a</sup> H. Q. Nimal Gunaratne,<sup>a</sup> Andrea Dolfi,<sup>c</sup> Geetha Srinivasan<sup>b</sup> and Małgorzata Swadźba-Kwaśny<sup>a\*</sup>

a. The QUILL Research Centre, School of Chemistry and Chemical Engineering, Queen's University Belfast, UK.

b. PETRONAS Research SDN BHD (PRSB), Malaysia.

c. PETRONAS Global Research & Technology Centre, Santena (Turin), Italy.

### Table of Contents

|                                                                                                                                                                                                                                                                                               |    |
|-----------------------------------------------------------------------------------------------------------------------------------------------------------------------------------------------------------------------------------------------------------------------------------------------|----|
| Figure S 1. Schematic representations of the commercially available cations and anions: standard ammonium, phosphonium, and dialkyl imidazolium cations and lipophilic anions, alkyl sulfonates, alkyl sulphates, or annexed from the surfactant industry, such as BTMPP, DEHP and DOSS. .... | 3  |
| Figure S 2. Protocol of solubility measurement of boronium ILs in oil by boron content .....                                                                                                                                                                                                  | 4  |
| Figure S 3. Photographs of nine boronium ILs. ....                                                                                                                                                                                                                                            | 4  |
| Figure S 4. <sup>1</sup> H NMR spectrum of B(C <sub>2</sub> mea)( <i>n</i> -butyl).....                                                                                                                                                                                                       | 5  |
| Figure S 5. <sup>13</sup> C NMR spectrum of B(C <sub>2</sub> mea)( <i>n</i> -butyl).....                                                                                                                                                                                                      | 6  |
| Figure S 6. <sup>11</sup> B NMR spectrum of B(C <sub>2</sub> mea)( <i>n</i> -butyl).....                                                                                                                                                                                                      | 6  |
| Figure S 7. <sup>1</sup> H NMR spectrum of B(C <sub>2</sub> mea)( <i>sec</i> -butyl).....                                                                                                                                                                                                     | 7  |
| Figure S 8. <sup>13</sup> C NMR spectrum of B(C <sub>2</sub> mea)( <i>sec</i> -butyl).....                                                                                                                                                                                                    | 7  |
| Figure S 9. <sup>11</sup> B NMR spectrum of B(C <sub>2</sub> mea)( <i>sec</i> -butyl).....                                                                                                                                                                                                    | 7  |
| Figure S 10. <sup>1</sup> H NMR spectrum of B(C <sub>2</sub> mea)( <i>iso</i> -butyl).....                                                                                                                                                                                                    | 8  |
| Figure S 11. <sup>13</sup> C NMR spectrum of B(C <sub>2</sub> mea)( <i>iso</i> -butyl).....                                                                                                                                                                                                   | 9  |
| Figure S 12. <sup>11</sup> B NMR spectrum of B(C <sub>2</sub> mea)( <i>iso</i> -butyl).....                                                                                                                                                                                                   | 9  |
| Figure S 13. Mass spectrum of B(C <sub>2</sub> mea)( <i>n</i> -butyl).....                                                                                                                                                                                                                    | 9  |
| Figure S 14. Mass spectrum of B(C <sub>2</sub> mea)( <i>sec</i> -butyl).....                                                                                                                                                                                                                  | 10 |
| Figure S 15. Mass spectrum of B(C <sub>2</sub> mea)( <i>iso</i> -butyl).....                                                                                                                                                                                                                  | 10 |
| Figure S 16. <sup>13</sup> C NMR spectrum of [B(C <sub>2</sub> mea)( <i>n</i> -butyl)(N <sub>811</sub> )] [OMs].....                                                                                                                                                                          | 11 |
| Figure S 17. <sup>11</sup> B NMR spectrum of [B(C <sub>2</sub> mea)( <i>n</i> -butyl)(N <sub>811</sub> )] [OMs].....                                                                                                                                                                          | 12 |
| Figure S 18. <sup>13</sup> C NMR spectrum of [B(C <sub>2</sub> mea)( <i>sec</i> -butyl)(N <sub>811</sub> )] [OMs].....                                                                                                                                                                        | 13 |
| Figure S 19. <sup>11</sup> B NMR spectrum of [B(C <sub>2</sub> mea)( <i>sec</i> -butyl)(N <sub>811</sub> )] [OMs].....                                                                                                                                                                        | 13 |
| Figure S 20. <sup>13</sup> C NMR spectrum of [B(C <sub>2</sub> mea)( <i>iso</i> -butyl)(N <sub>811</sub> )] [OMs].....                                                                                                                                                                        | 14 |
| Figure S 21. <sup>11</sup> B NMR spectrum of [B(C <sub>2</sub> mea)( <i>iso</i> -butyl)(N <sub>811</sub> )] [OMs].....                                                                                                                                                                        | 15 |
| Figure S 22. <sup>1</sup> H NMR spectrum of IL-1 [B(C <sub>2</sub> mea)( <i>n</i> -butyl)(N <sub>811</sub> )] [EH].....                                                                                                                                                                       | 15 |
| Figure S 23. <sup>13</sup> C NMR spectrum of IL-1 [B(C <sub>2</sub> mea)( <i>n</i> -butyl)(N <sub>811</sub> )] [EH].....                                                                                                                                                                      | 16 |
| Figure S 24. <sup>11</sup> B NMR spectrum of IL-1 [B(C <sub>2</sub> mea)( <i>n</i> -butyl)(N <sub>811</sub> )] [EH].....                                                                                                                                                                      | 16 |
| Figure S 25. <sup>1</sup> H NMR spectrum of IL-2 [B(C <sub>2</sub> mea)( <i>n</i> -butyl)(N <sub>811</sub> )] [MA].....                                                                                                                                                                       | 17 |
| Figure S 26. <sup>13</sup> C NMR spectrum of IL-2 [B(C <sub>2</sub> mea)( <i>n</i> -butyl)(N <sub>811</sub> )] [MA].....                                                                                                                                                                      | 17 |
| Figure S 27. <sup>11</sup> B NMR spectrum of IL-2 [B(C <sub>2</sub> mea)( <i>n</i> -butyl)(N <sub>811</sub> )] [MA].....                                                                                                                                                                      | 18 |
| Figure S 28. <sup>1</sup> H NMR spectrum of IL-3 [B(C <sub>2</sub> mea)( <i>n</i> -butyl)(N <sub>811</sub> )] [OI].....                                                                                                                                                                       | 18 |
| Figure S 29. <sup>13</sup> C NMR spectrum of IL-3 [B(C <sub>2</sub> mea)( <i>n</i> -butyl)(N <sub>811</sub> )] [OI].....                                                                                                                                                                      | 19 |
| Figure S 30. <sup>11</sup> B NMR spectrum of IL-3 [B(C <sub>2</sub> mea)( <i>n</i> -butyl)(N <sub>811</sub> )] [OI].....                                                                                                                                                                      | 19 |
| Figure S 31. <sup>1</sup> H NMR spectrum of IL-4 [B(C <sub>2</sub> mea)( <i>sec</i> -butyl)(N <sub>811</sub> )] [EH].....                                                                                                                                                                     | 20 |

|                                                                                                                                                                                                                                                                                                                     |    |
|---------------------------------------------------------------------------------------------------------------------------------------------------------------------------------------------------------------------------------------------------------------------------------------------------------------------|----|
| Figure S 32. $^{13}\text{C}$ NMR spectrum of IL-4 $[\text{B}(\text{C}_{2\text{mea}})(\text{sec-butyl})(\text{N}_{811})][\text{EH}]$ .....                                                                                                                                                                           | 21 |
| Figure S 33. $^{11}\text{B}$ NMR spectrum of IL-4 $[\text{B}(\text{C}_{2\text{mea}})(\text{sec-butyl})(\text{N}_{811})][\text{EH}]$ .....                                                                                                                                                                           | 21 |
| Figure S 34. $^1\text{H}$ NMR spectrum of IL-5 $[\text{B}(\text{C}_{2\text{mea}})(\text{sec-butyl})(\text{N}_{811})][\text{MA}]$ .....                                                                                                                                                                              | 21 |
| Figure S 35. $^{13}\text{C}$ NMR spectrum of IL-5 $[\text{B}(\text{C}_{2\text{mea}})(\text{sec-butyl})(\text{N}_{811})][\text{MA}]$ .....                                                                                                                                                                           | 22 |
| Figure S 36. $^{11}\text{B}$ NMR spectrum of IL-5 $[\text{B}(\text{C}_{2\text{mea}})(\text{sec-butyl})(\text{N}_{811})][\text{MA}]$ .....                                                                                                                                                                           | 22 |
| Figure S 37. $^1\text{H}$ NMR spectrum of IL-6 $[\text{B}(\text{C}_{2\text{mea}})(\text{sec-butyl})(\text{N}_{811})][\text{OI}]$ .....                                                                                                                                                                              | 23 |
| Figure S 38. $^{13}\text{C}$ NMR spectrum of IL-6 $[\text{B}(\text{C}_{2\text{mea}})(\text{sec-butyl})(\text{N}_{811})][\text{OI}]$ .....                                                                                                                                                                           | 23 |
| Figure S 39. $^{11}\text{B}$ NMR spectrum of IL-6 $[\text{B}(\text{C}_{2\text{mea}})(\text{sec-butyl})(\text{N}_{811})][\text{OI}]$ .....                                                                                                                                                                           | 24 |
| Figure S 40. $^1\text{H}$ NMR spectrum of IL-7 $[\text{B}(\text{C}_{2\text{mea}})(\text{iso-butyl})(\text{N}_{811})][\text{EH}]$ .....                                                                                                                                                                              | 24 |
| Figure S 41. $^{13}\text{C}$ NMR spectrum of IL-7 $[\text{B}(\text{C}_{2\text{mea}})(\text{iso-butyl})(\text{N}_{811})][\text{EH}]$ .....                                                                                                                                                                           | 25 |
| Figure S 42. $^{11}\text{B}$ NMR spectrum of IL-7 $[\text{B}(\text{C}_{2\text{mea}})(\text{iso-butyl})(\text{N}_{811})][\text{EH}]$ .....                                                                                                                                                                           | 25 |
| Figure S 43. $^1\text{H}$ NMR spectrum of IL-8 $[\text{B}(\text{C}_{2\text{mea}})(\text{iso-butyl})(\text{N}_{811})][\text{MA}]$ .....                                                                                                                                                                              | 26 |
| Figure S 44. $^{13}\text{C}$ NMR spectrum of IL-8 $[\text{B}(\text{C}_{2\text{mea}})(\text{iso-butyl})(\text{N}_{811})][\text{MA}]$ .....                                                                                                                                                                           | 26 |
| Figure S 45. $^{11}\text{B}$ NMR spectrum of IL-8 $[\text{B}(\text{C}_{2\text{mea}})(\text{iso-butyl})(\text{N}_{811})][\text{MA}]$ .....                                                                                                                                                                           | 27 |
| Figure S 46. $^1\text{H}$ NMR spectrum of IL-9 $[\text{B}(\text{C}_{2\text{mea}})(\text{iso-butyl})(\text{N}_{811})][\text{OI}]$ .....                                                                                                                                                                              | 27 |
| Figure S 47. $^{13}\text{C}$ NMR spectrum of IL-9 $[\text{B}(\text{C}_{2\text{mea}})(\text{iso-butyl})(\text{N}_{811})][\text{OI}]$ .....                                                                                                                                                                           | 28 |
| Figure S 48. $^{11}\text{B}$ NMR spectrum of IL-9 $[\text{B}(\text{C}_{2\text{mea}})(\text{iso-butyl})(\text{N}_{811})][\text{OI}]$ .....                                                                                                                                                                           | 28 |
| Figure S 49. Mass spectrum of IL-1 $[\text{B}(\text{C}_{2\text{mea}})(\text{n-butyl})(\text{N}_{811})][\text{EH}]$ .....                                                                                                                                                                                            | 29 |
| Figure S 50. Mass spectrum of IL-2 $[\text{B}(\text{C}_{2\text{mea}})(\text{n-butyl})(\text{N}_{811})][\text{MA}]$ .....                                                                                                                                                                                            | 29 |
| Figure S 51. Mass spectrum of IL-3 $[\text{B}(\text{C}_{2\text{mea}})(\text{n-butyl})(\text{N}_{811})][\text{OI}]$ .....                                                                                                                                                                                            | 29 |
| Figure S 52. Mass spectrum of IL-4 $[\text{B}(\text{C}_{2\text{mea}})(\text{sec-butyl})(\text{N}_{811})][\text{EH}]$ .....                                                                                                                                                                                          | 29 |
| Figure S 53. Mass spectrum of IL-5 $[\text{B}(\text{C}_{2\text{mea}})(\text{sec-butyl})(\text{N}_{811})][\text{MA}]$ .....                                                                                                                                                                                          | 30 |
| Figure S 54. Mass spectrum of IL-6 $[\text{B}(\text{C}_{2\text{mea}})(\text{sec-butyl})(\text{N}_{811})][\text{OI}]$ .....                                                                                                                                                                                          | 30 |
| Figure S 55. Mass spectrum of IL-7 $[\text{B}(\text{C}_{2\text{mea}})(\text{iso-butyl})(\text{N}_{811})][\text{EH}]$ .....                                                                                                                                                                                          | 30 |
| Figure S 56. Mass spectrum of IL-8 $[\text{B}(\text{C}_{2\text{mea}})(\text{iso-butyl})(\text{N}_{811})][\text{MA}]$ .....                                                                                                                                                                                          | 30 |
| Figure S 57. Mass spectrum of IL-9 $[\text{B}(\text{C}_{2\text{mea}})(\text{iso-butyl})(\text{N}_{811})][\text{OI}]$ .....                                                                                                                                                                                          | 31 |
| Figure S 58. $^{11}\text{B}$ NMR spectra of $\text{B}(\text{C}_{2\text{mea}})(\text{sec-Bu})$ and derived ILs: $[\text{B}(\text{C}_{2\text{mea}})(\text{sec-Bu})(\text{N}_{811})][\text{OMs}]$ , IL4, IL5 and IL6. ....                                                                                             | 31 |
| Figure S 59. $^{11}\text{B}$ NMR spectra of $\text{B}(\text{C}_{2\text{mea}})(\text{iso-Bu})$ and derived ILs: $[\text{B}(\text{C}_{2\text{mea}})(\text{iso-Bu})(\text{N}_{811})][\text{OMs}]$ , IL7, IL8 and IL9. ....                                                                                             | 32 |
| Figure S 60. Raman spectra of $\text{B}(\text{C}_{2\text{mea}})(\text{n-Bu})$ and the derived ILs: $[\text{B}(\text{C}_{2\text{mea}})(\text{n-Bu})(\text{N}_{811})][\text{OMs}]$ , IL-1, IL-2 and IL-3.....                                                                                                         | 33 |
| Figure S 61. Raman spectra of $\text{B}(\text{C}_{2\text{mea}})(\text{sec-Bu})$ and the derived ILs: $[\text{B}(\text{C}_{2\text{mea}})(\text{sec-Bu})(\text{N}_{811})][\text{OMs}]$ , IL-4, IL-5 and IL-6. ...                                                                                                     | 33 |
| Figure S 62. Raman spectra of $\text{B}(\text{C}_{2\text{mea}})(\text{iso-Bu})$ and the derived ILs: $[\text{B}(\text{C}_{2\text{mea}})(\text{iso-Bu})(\text{N}_{811})][\text{OMs}]$ , IL-7, IL-8 and IL-9. ....                                                                                                    | 34 |
| Figure S 63. DSC traces of neat of $\text{B}(\text{C}_{2\text{mea}})\text{nBu}$ , and the derived ILs: $[\text{B}(\text{C}_{2\text{mea}})(\text{N}_{811})\text{nBu}][\text{OMs}]$ , IL1, IL2 and IL3. Temperature scan rate: $2\text{ }^\circ\text{C min}^{-1}$ . DSC trace from the second thermal cycle. ....     | 34 |
| Figure S 64. DSC traces of neat of $\text{B}(\text{C}_{2\text{mea}})\text{secBu}$ , and the derived ILs: $[\text{B}(\text{C}_{2\text{mea}})(\text{N}_{811})\text{secBu}][\text{OMs}]$ , IL4, IL5 and IL6. Temperature scan rate: $2\text{ }^\circ\text{C min}^{-1}$ . DSC trace from the second thermal cycle. .... | 35 |
| Figure S 65. DSC traces of neat of $\text{B}(\text{C}_{2\text{mea}})\text{isoBu}$ , and the derived ILs: $[\text{B}(\text{C}_{2\text{mea}})(\text{N}_{811})\text{isoBu}][\text{OMs}]$ , IL7, IL8 and IL9. Temperature scan rate: $2\text{ }^\circ\text{C min}^{-1}$ . DSC trace from the second thermal cycle. .... | 35 |
| Figure S 66. Photograph of 9 boronium ILs in Group III+ base oil.....                                                                                                                                                                                                                                               | 36 |
| Figure S 67. Friction coefficient profile of Group III+ base oil and mixtures containing GMO and nine new boronium ILs at 1800 s test time and above.....                                                                                                                                                           | 37 |
| Figure S 68. Chemical structure of glycerol monooleate (GMO), a common type of friction modifier. ....                                                                                                                                                                                                              | 37 |
| Figure S 69. $^1\text{H}$ NMR (400 MHz) spectrum of glycerol monooleate (GMO). ....                                                                                                                                                                                                                                 | 37 |

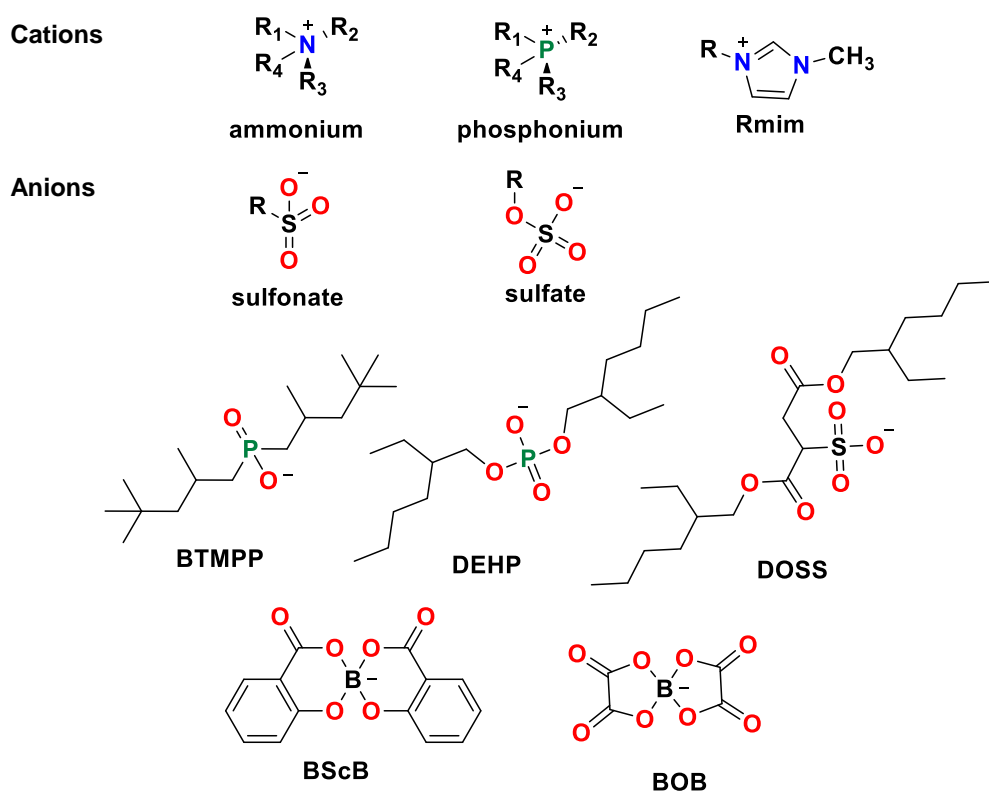

Figure S 1. Schematic representations of the commercially available cations and anions: standard ammonium, phosphonium, and dialkyl imidazolium cations and lipophilic anions, alkyl sulfonates, alkyl sulphates, or annexed from the surfactant industry, such as BTMPP, DEHP and DOSS.

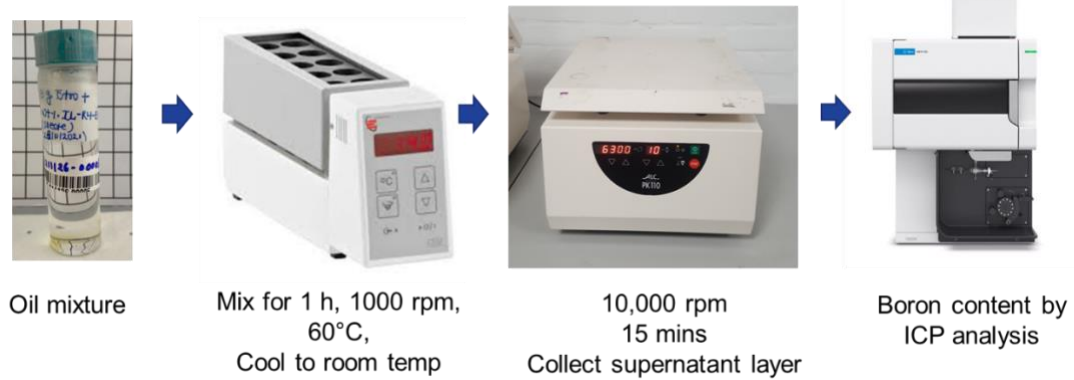

Figure S 2. Protocol of solubility measurement of boronium ILs in oil by boron content

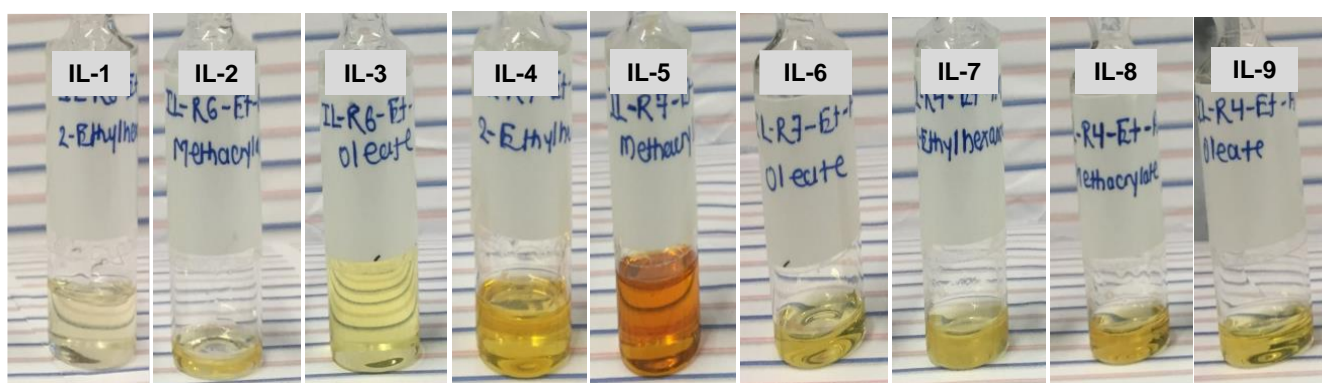

Figure S 3. Photographs of nine boronium ILs.

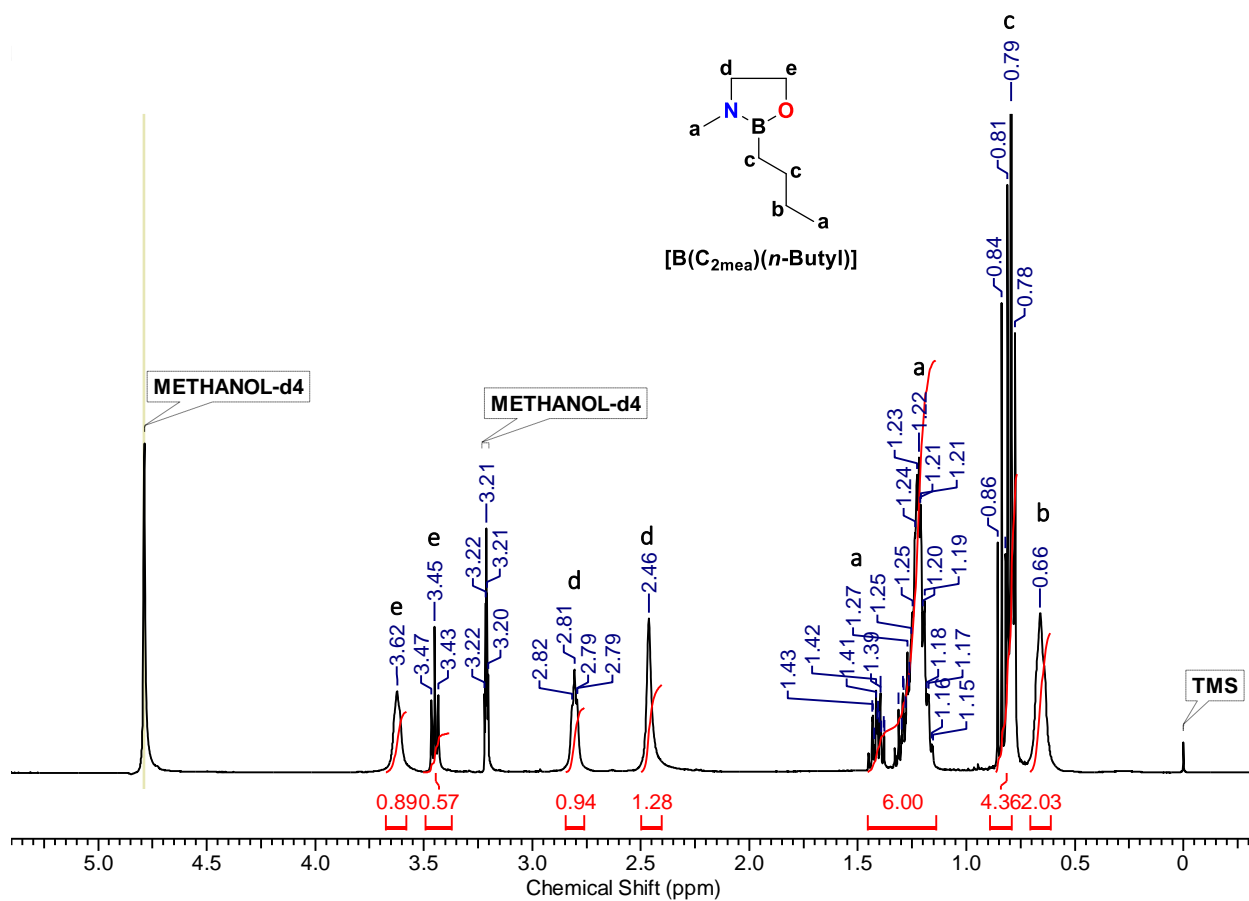

Figure S 4. <sup>1</sup>H NMR spectrum of B(C<sub>2</sub>mea)(*n*-butyl).

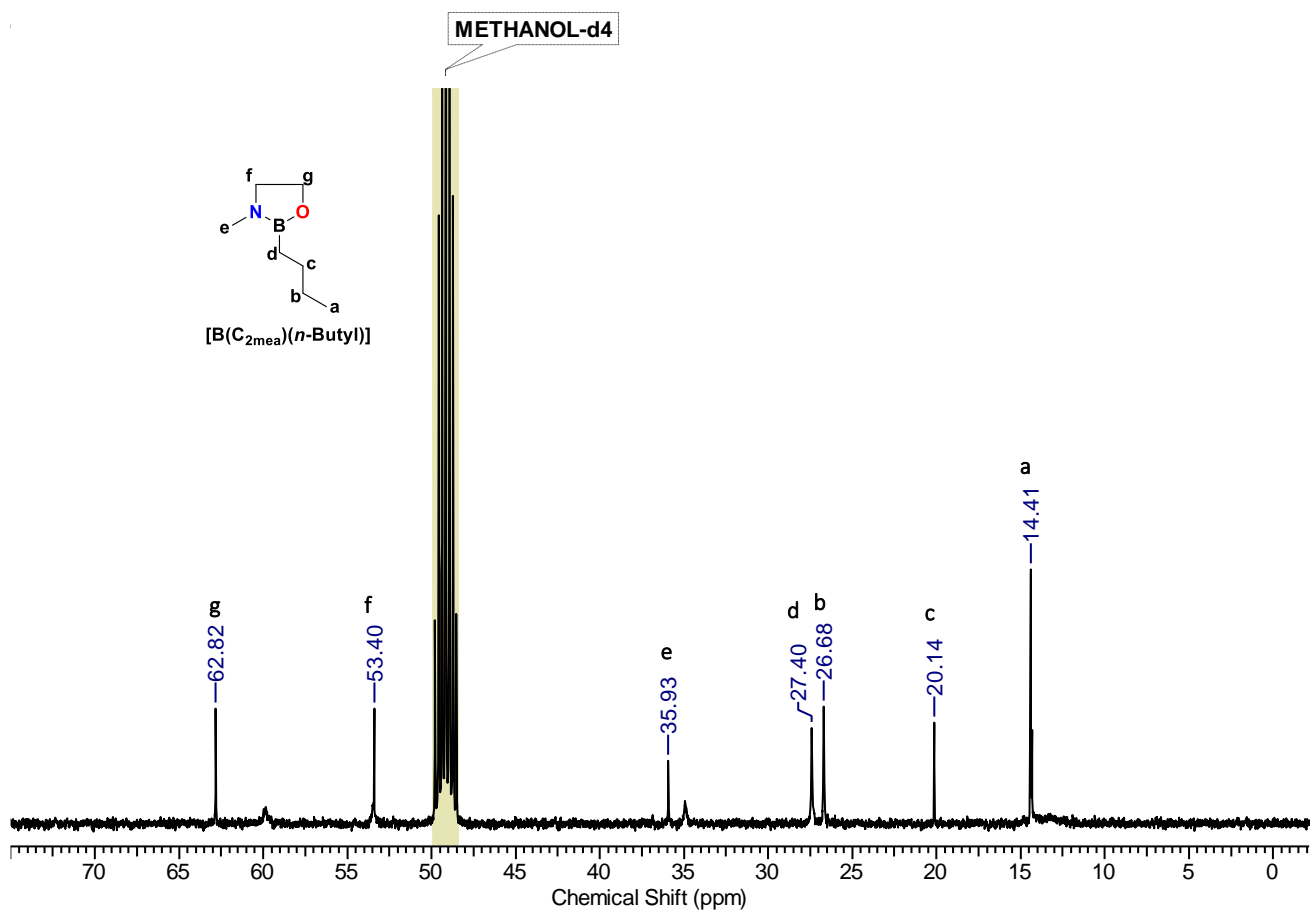

Figure S 5.  $^{13}\text{C}$  NMR spectrum of  $\text{B}(\text{C}_{2\text{mea}})(n\text{-butyl})$ .

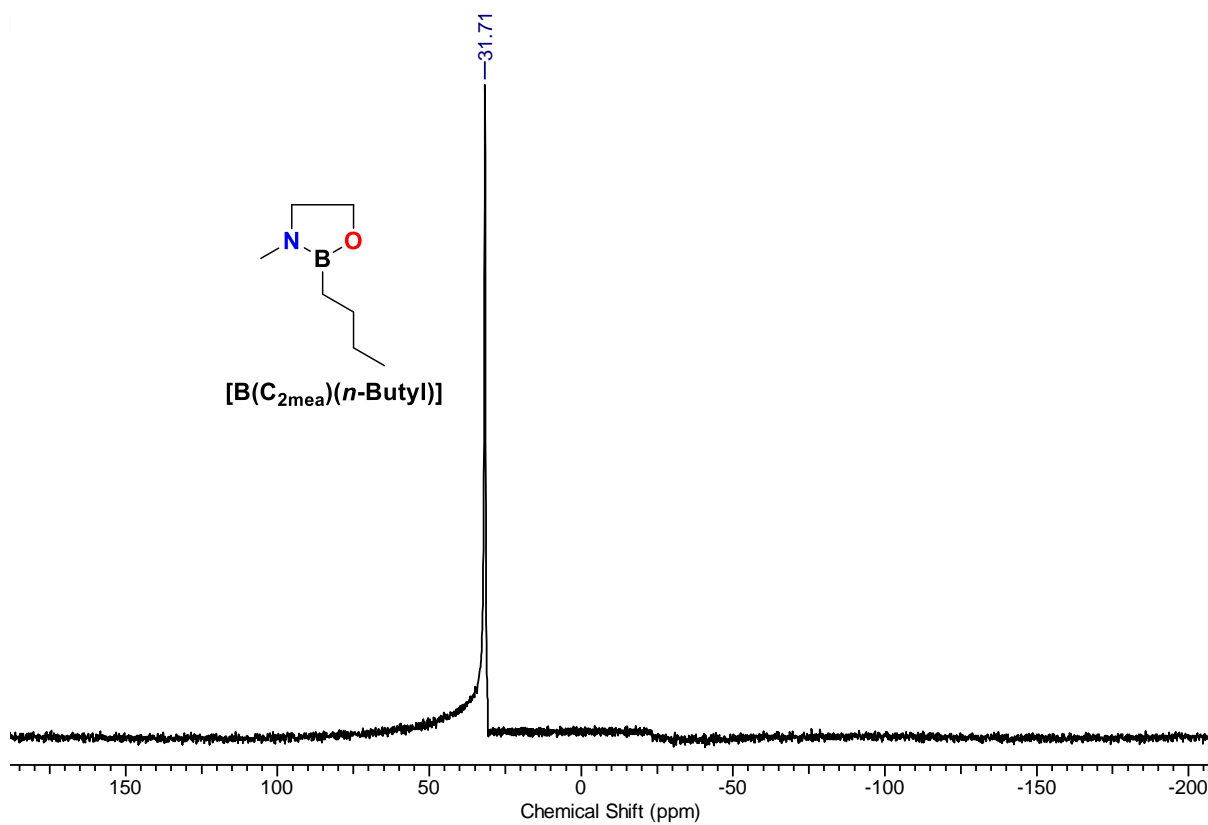

Figure S 6.  $^{11}\text{B}$  NMR spectrum of  $\text{B}(\text{C}_{2\text{mea}})(n\text{-butyl})$ .

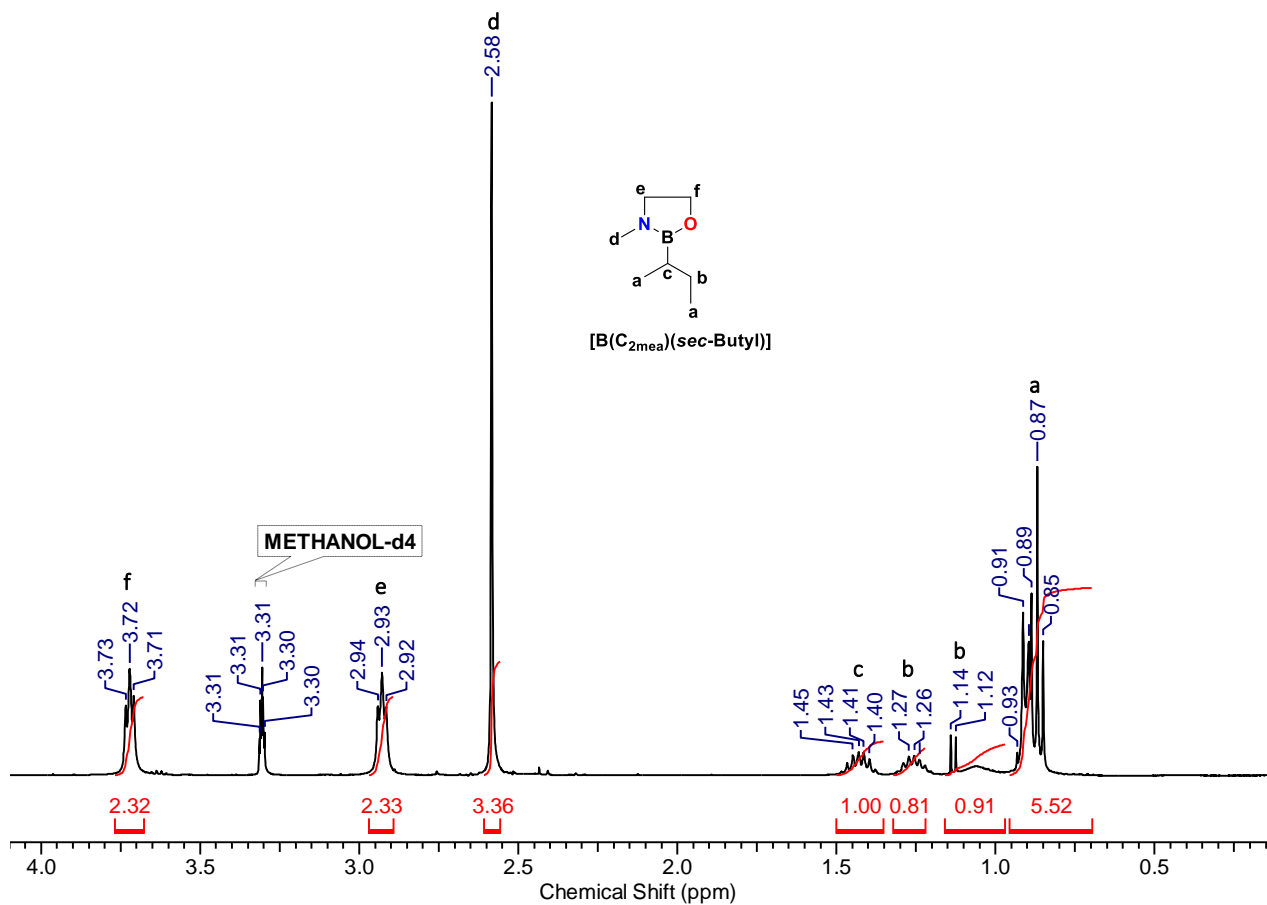

Figure S 7.  $^1\text{H}$  NMR spectrum of  $\text{B}(\text{C}_{2\text{mea}})(\text{sec-butyl})$ .

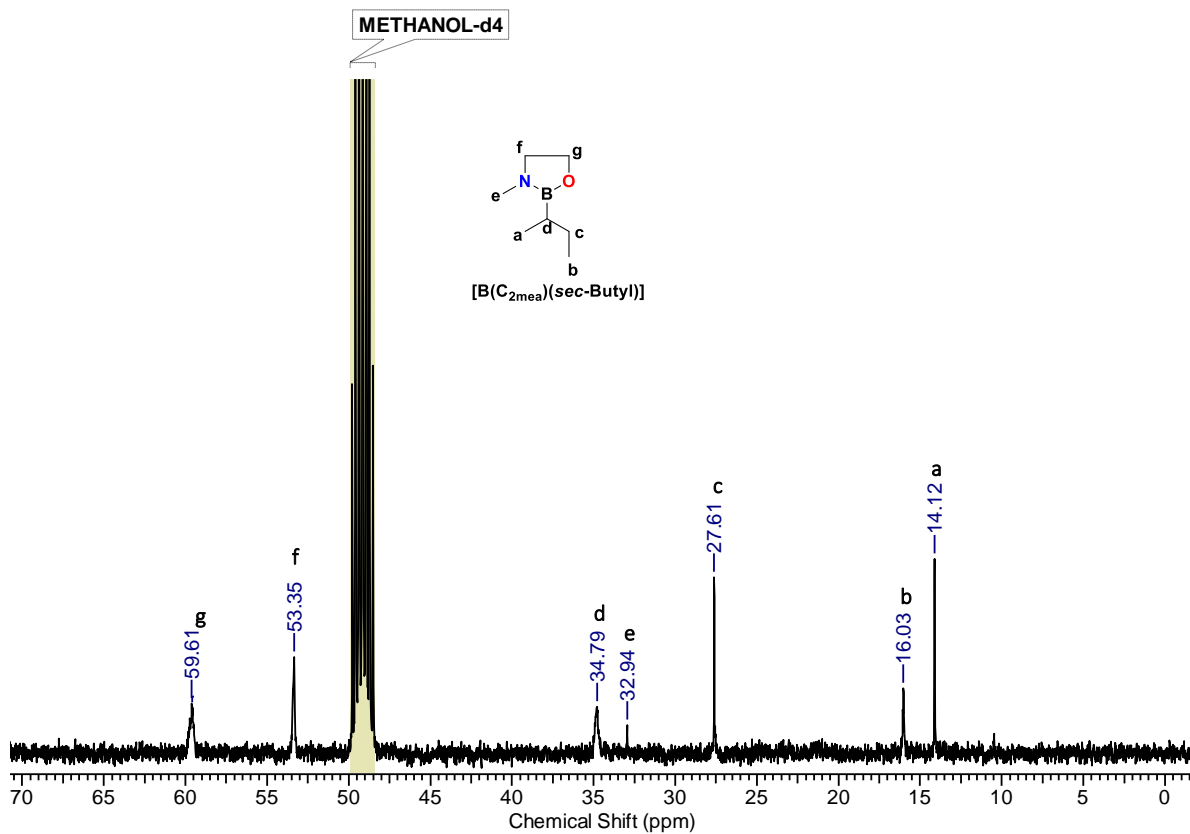

Figure S 8.  $^{13}\text{C}$  NMR spectrum of  $\text{B}(\text{C}_{2\text{mea}})(\text{sec-butyl})$ .

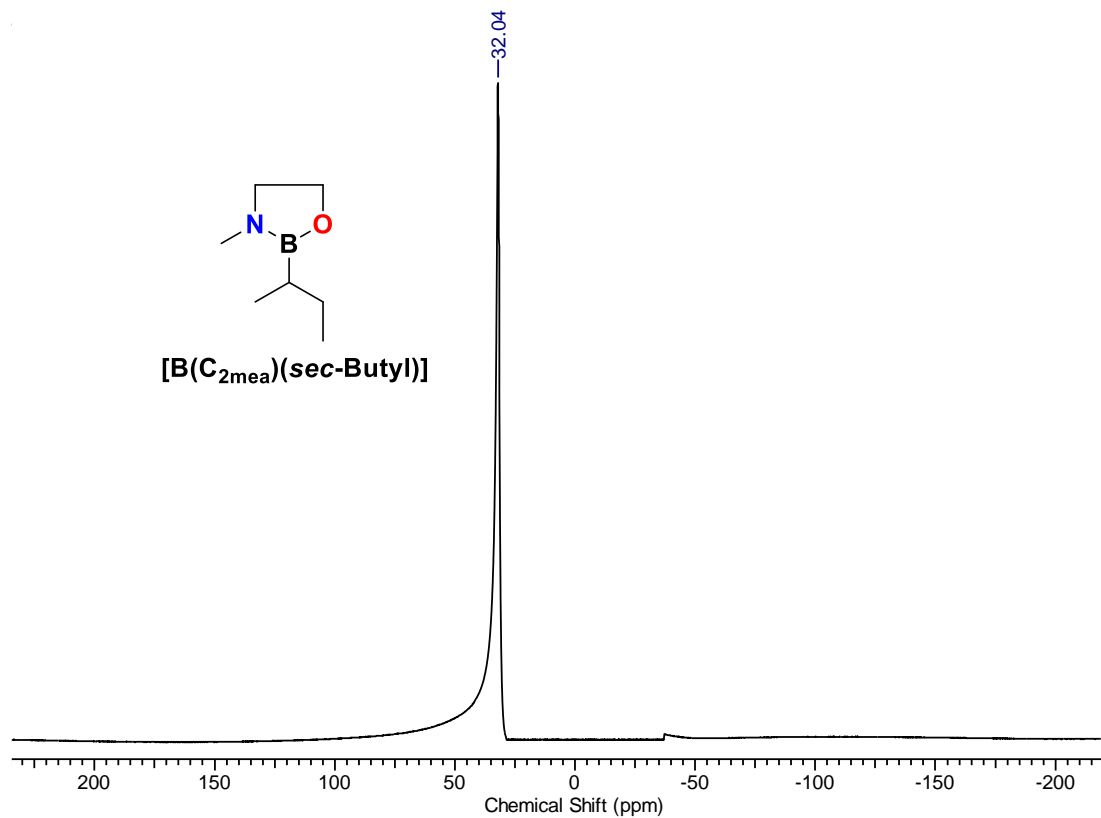

Figure S 9.  $^{11}\text{B}$  NMR spectrum of  $\text{B}(\text{C}_{2\text{mea}})(\text{sec-butyl})$ .

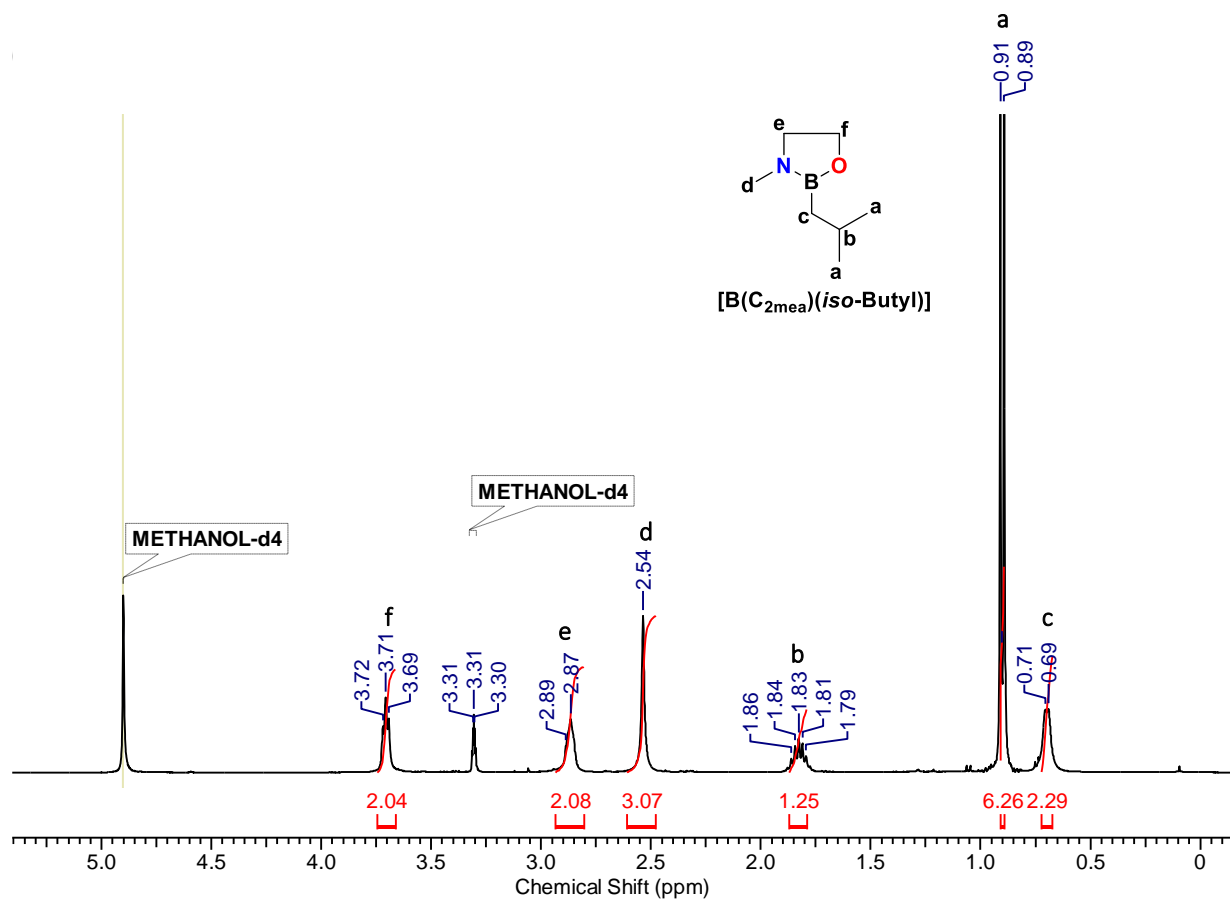

Figure S 10.  $^1H$  NMR spectrum of  $B(C_{2mea})(iso-butyl)$ .

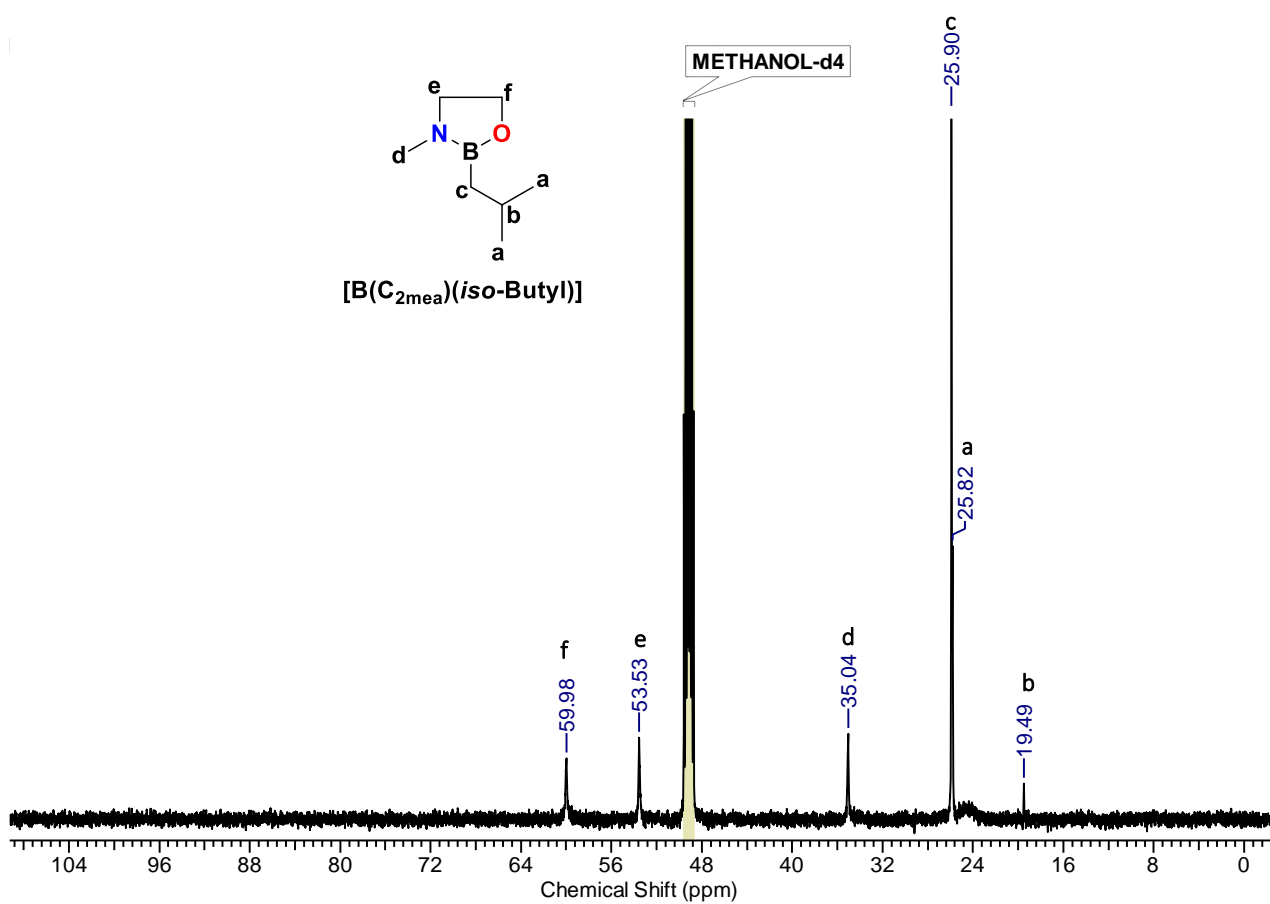



Figure S 11.  $^{13}\text{C}$  NMR spectrum of  $\text{B}(\text{C}_{2\text{mea}})(\text{iso-butyl})$ .

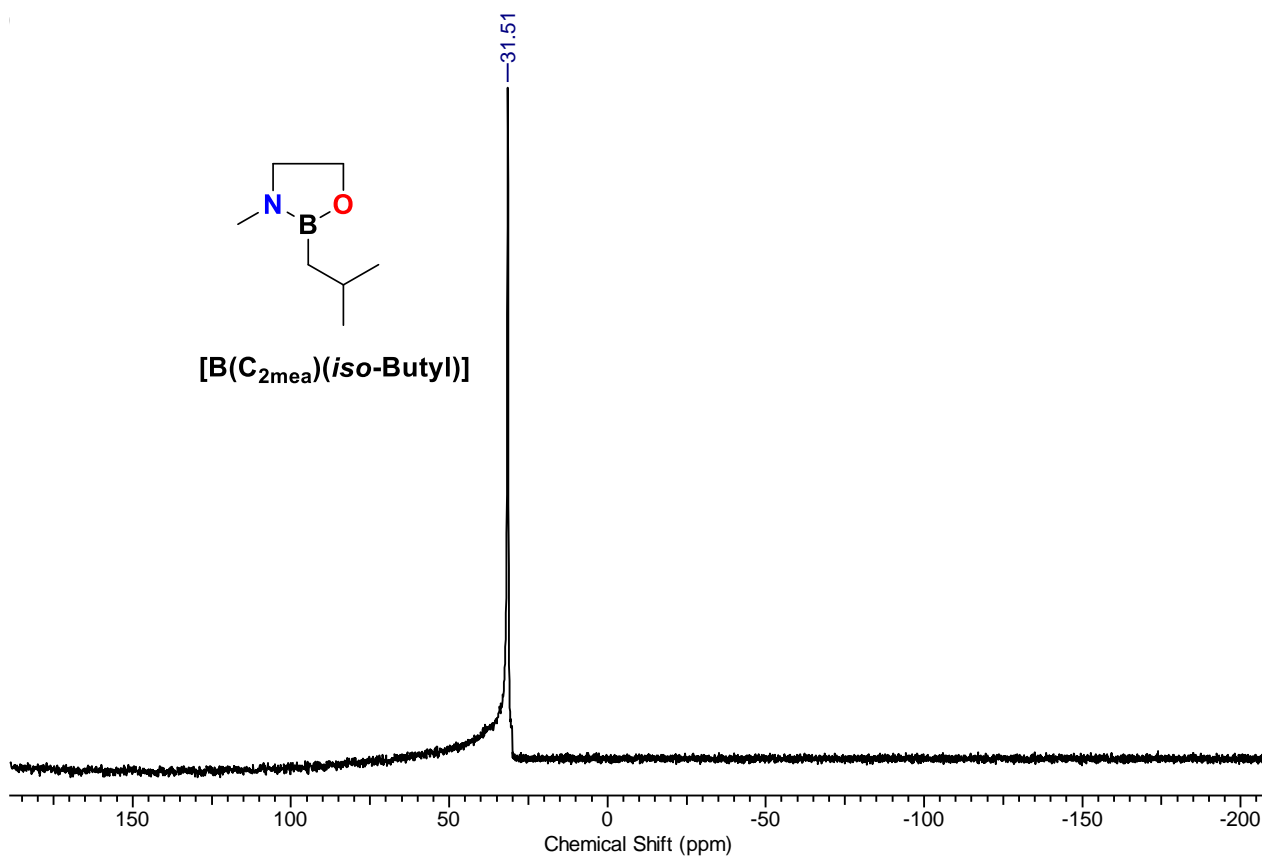

Figure S 12.  $^{11}\text{B}$  NMR spectrum of  $\text{B}(\text{C}_{2\text{mea}})(\text{iso-butyl})$ .

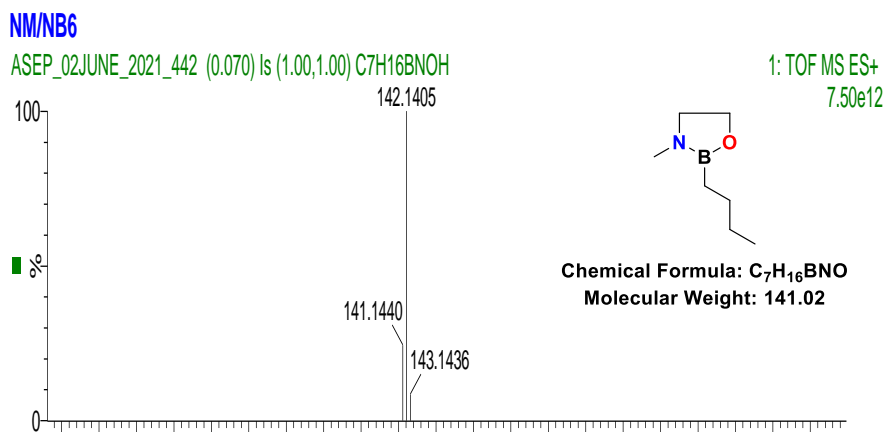

Figure S 13. Mass spectrum of  $\text{B}(\text{C}_{2\text{mea}})(n\text{-butyl})$ .

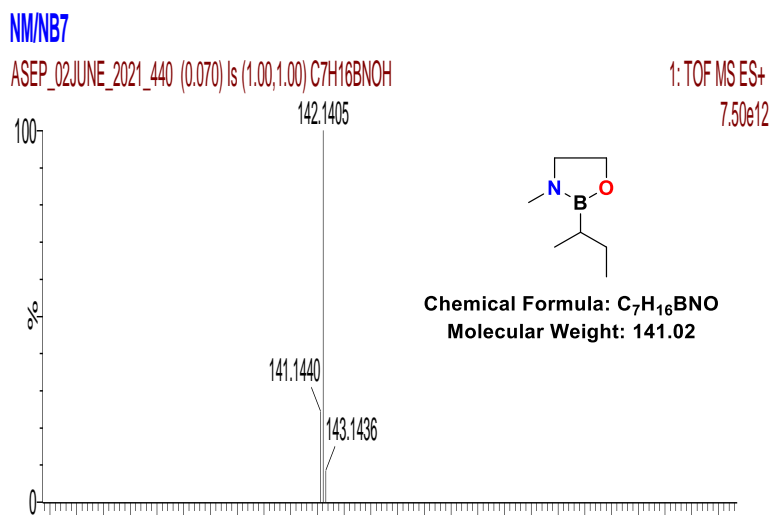

Figure S 14. Mass spectrum of B(C<sub>2mea</sub>)(*sec*-butyl).

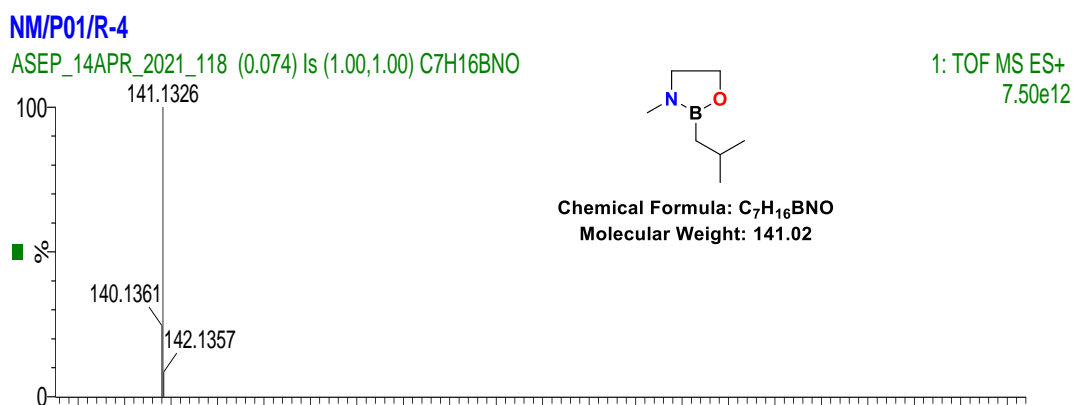

Figure S 15. Mass spectrum of B(C<sub>2mea</sub>)(*iso*-butyl).

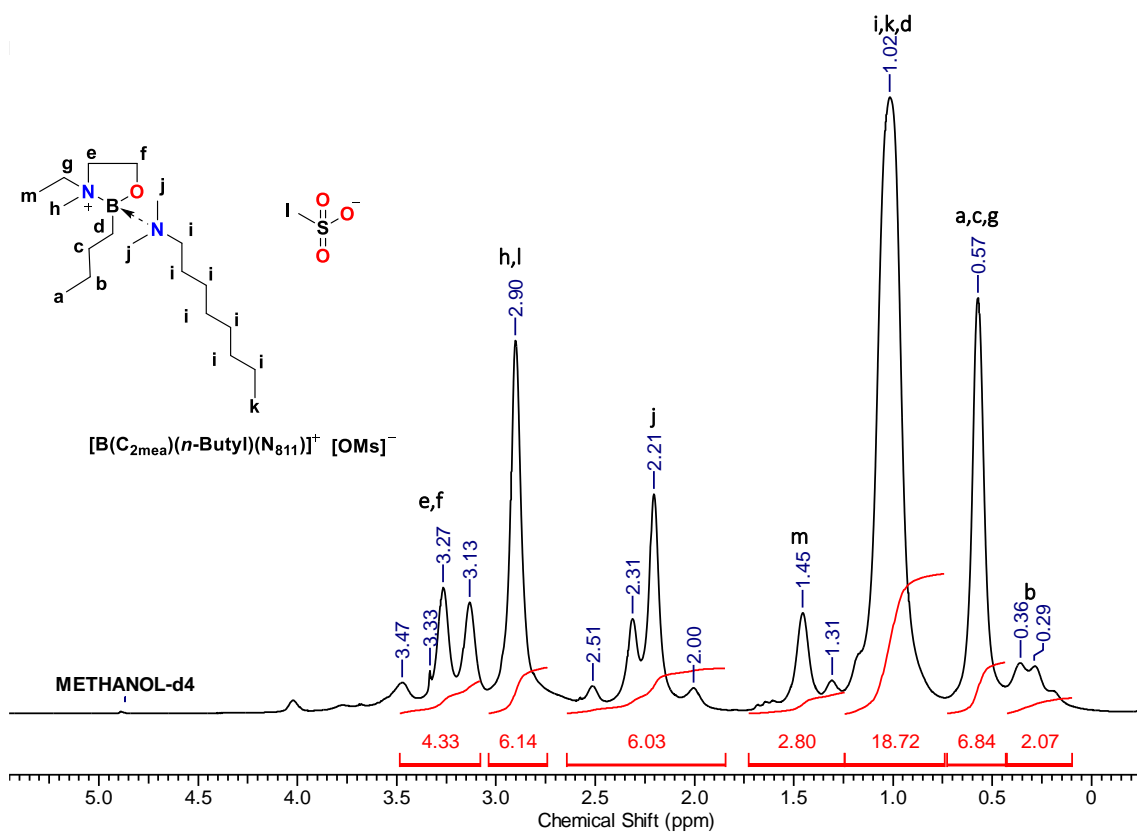

Figure S 16.  $^1\text{H}$  NMR spectrum of  $[\text{B}(\text{C}_{2\text{mea}})(n\text{-butyl})(\text{N}_{811})][\text{OMs}]$ .

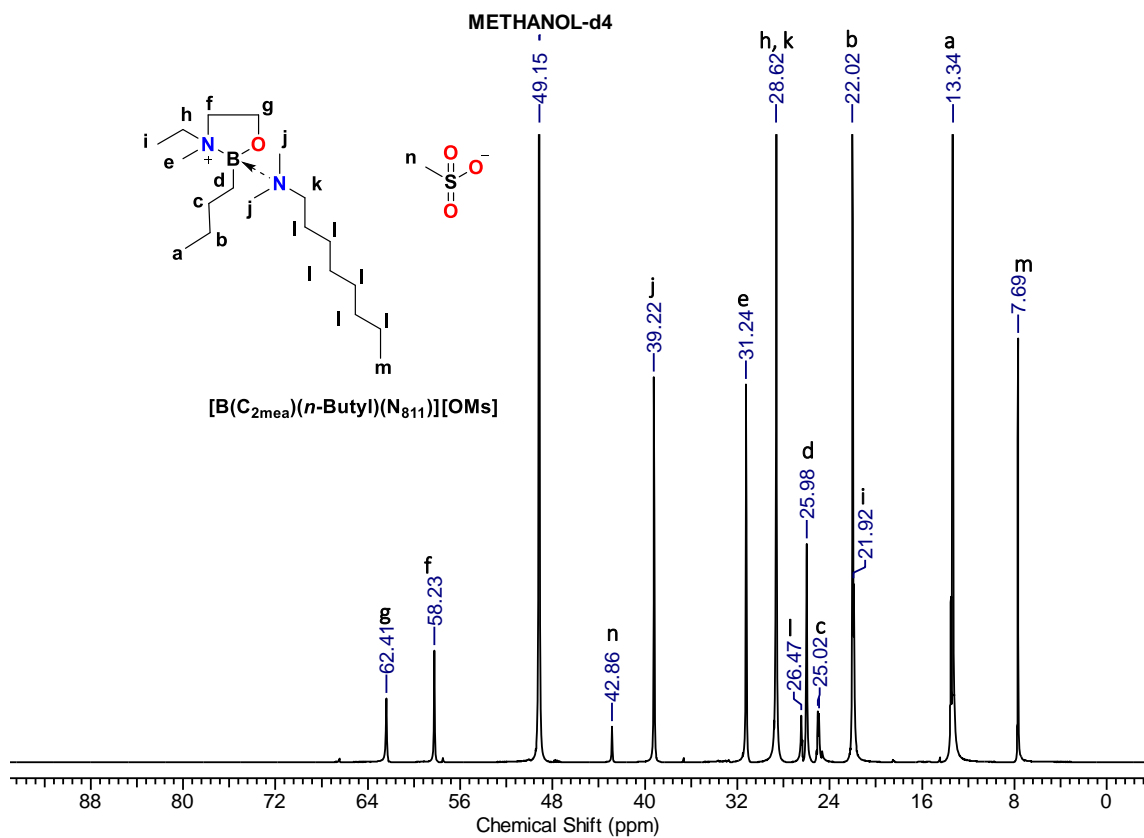

Figure S 17.  $^{13}\text{C}$  NMR spectrum of  $[\text{B}(\text{C}_{2\text{mea}})(n\text{-butyl})(\text{N}_{811})][\text{OMs}]$ .

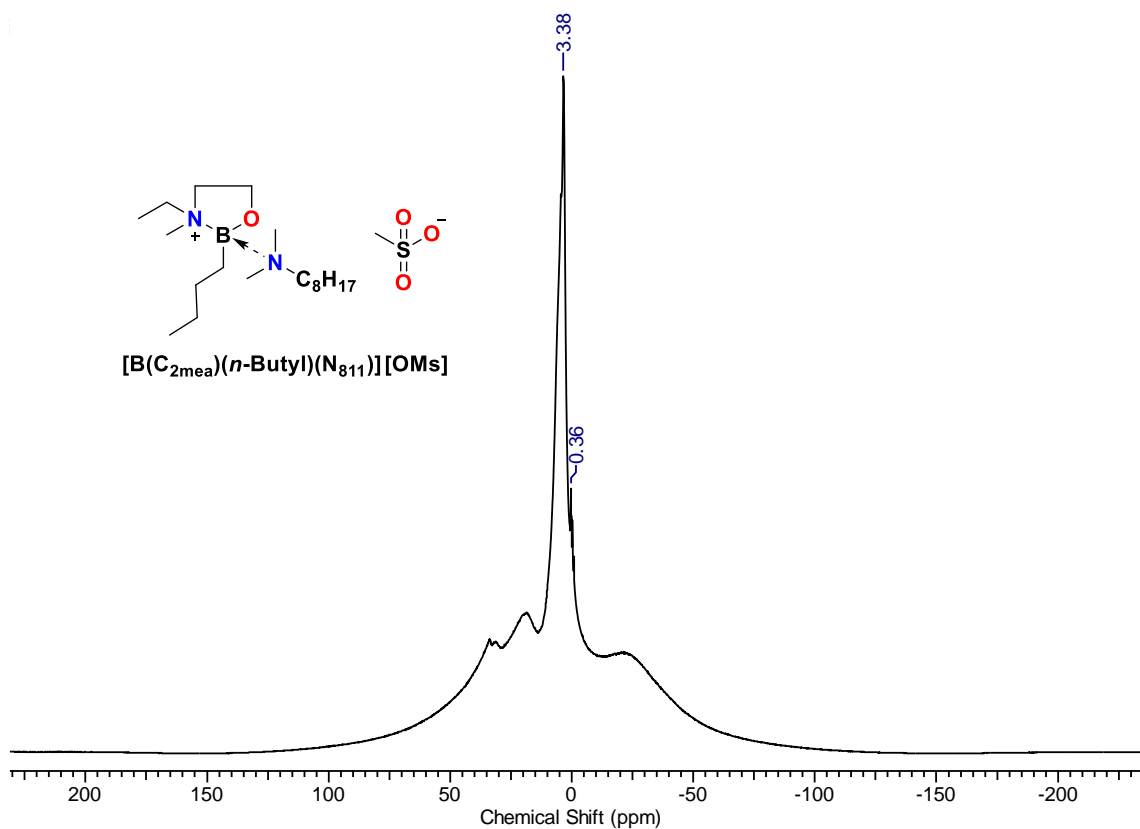

Figure S 18.  $^{11}B$  NMR spectrum of  $[B(C_{2mea})(n\text{-butyl})(N_{811})][OMs]$ .

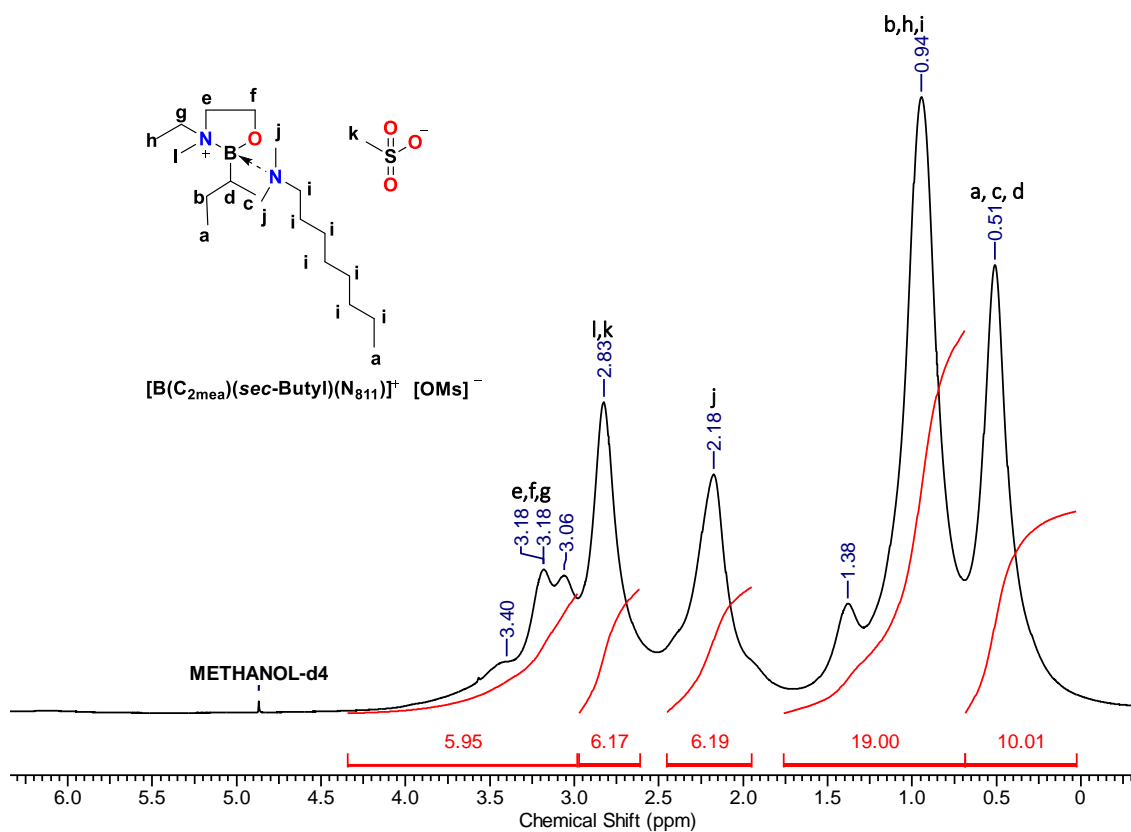

Figure S 19.  $^1H$  NMR spectrum of  $[B(C_{2mea})(sec\text{-butyl})(N_{811})][OMs]$ .

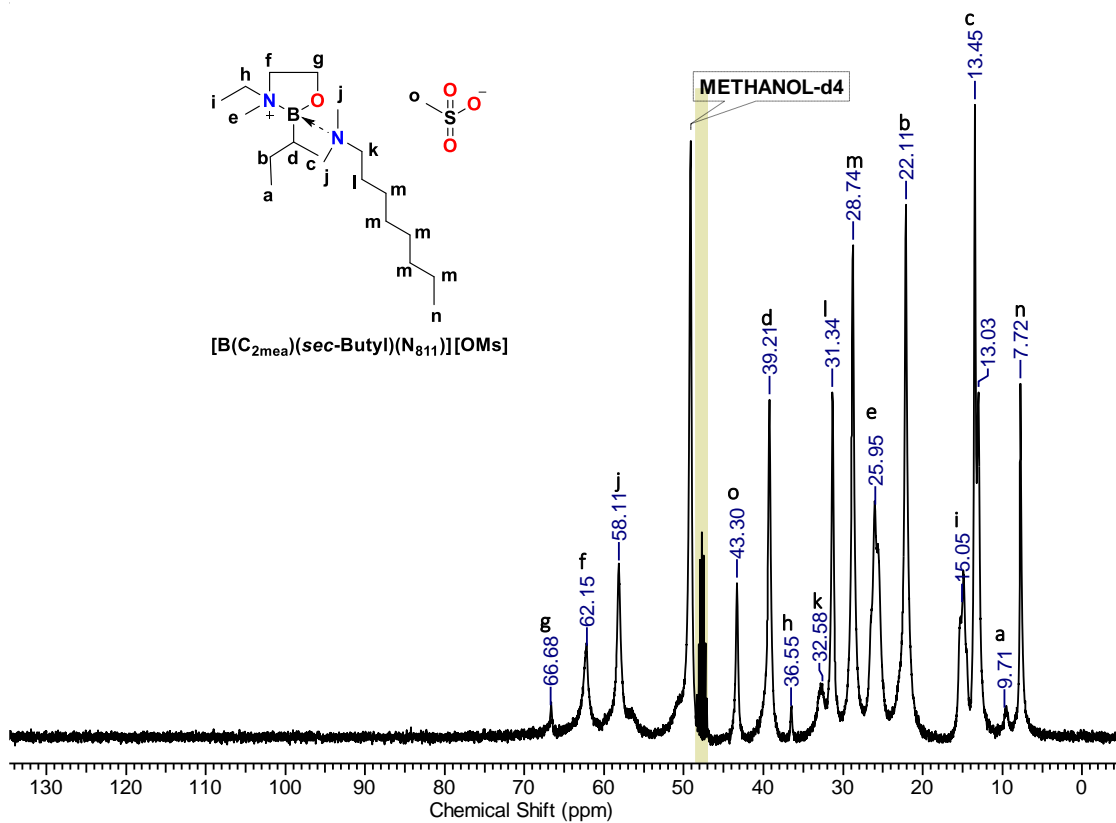

Figure S 20.  $^{13}C$  NMR spectrum of  $[B(C_{2mea})(sec\text{-butyl})(N_{811})][OMs]$ .

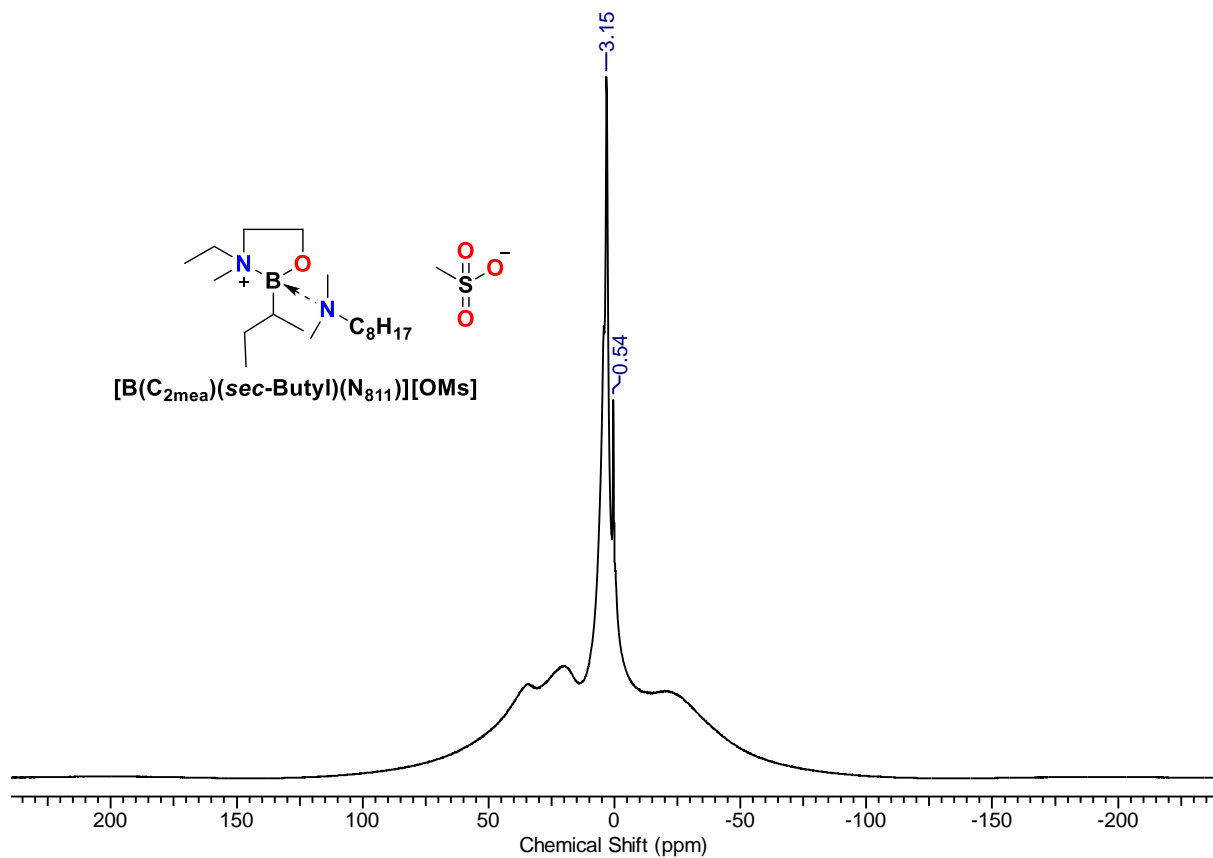

Figure S 21.  $^{11}B$  NMR spectrum of  $[B(C_{2mea})(sec\text{-butyl})(N_{811})][OMs]$ .

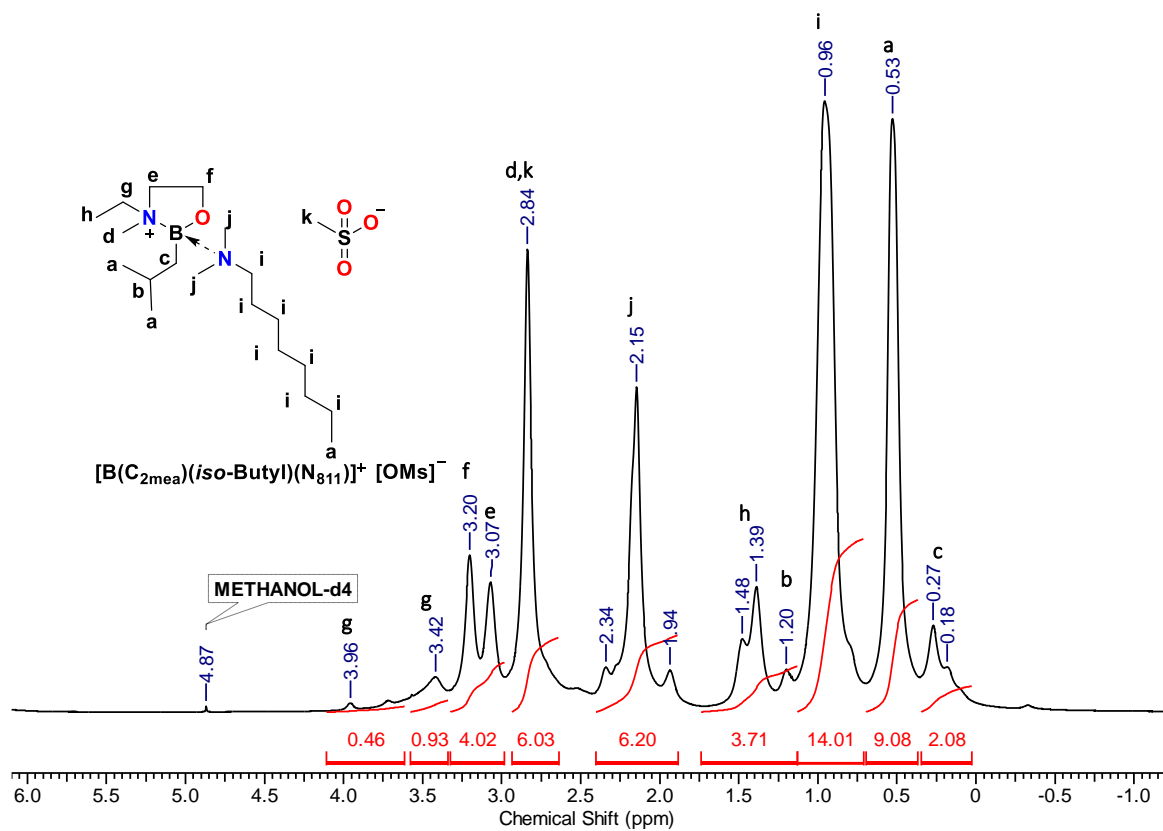

Figure S 22. <sup>1</sup>H NMR spectrum of [B(C<sub>2</sub>mea)(iso-butyl)(N<sub>811</sub>)]<sup>+</sup>[OMs]<sup>-</sup>.

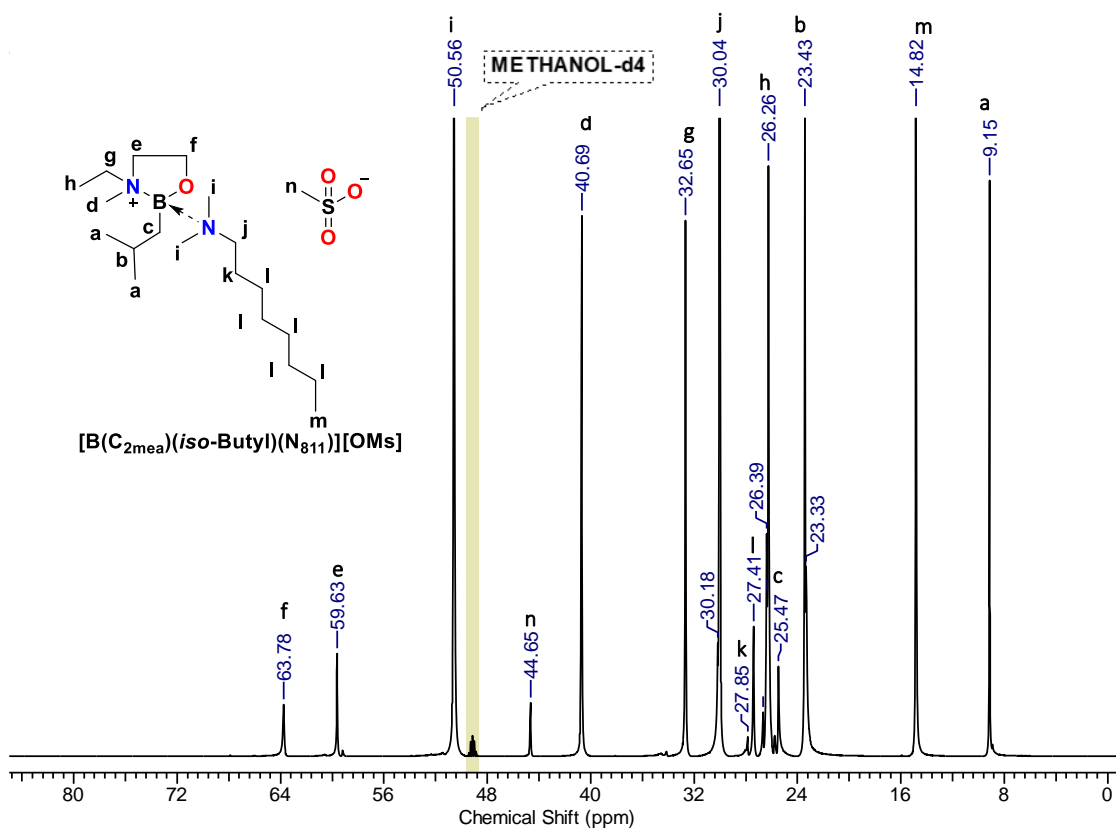

Figure S 23. <sup>13</sup>C NMR spectrum of [B(C<sub>2</sub>mea)(iso-butyl)(N<sub>811</sub>)]<sup>+</sup>[OMs]<sup>-</sup>.

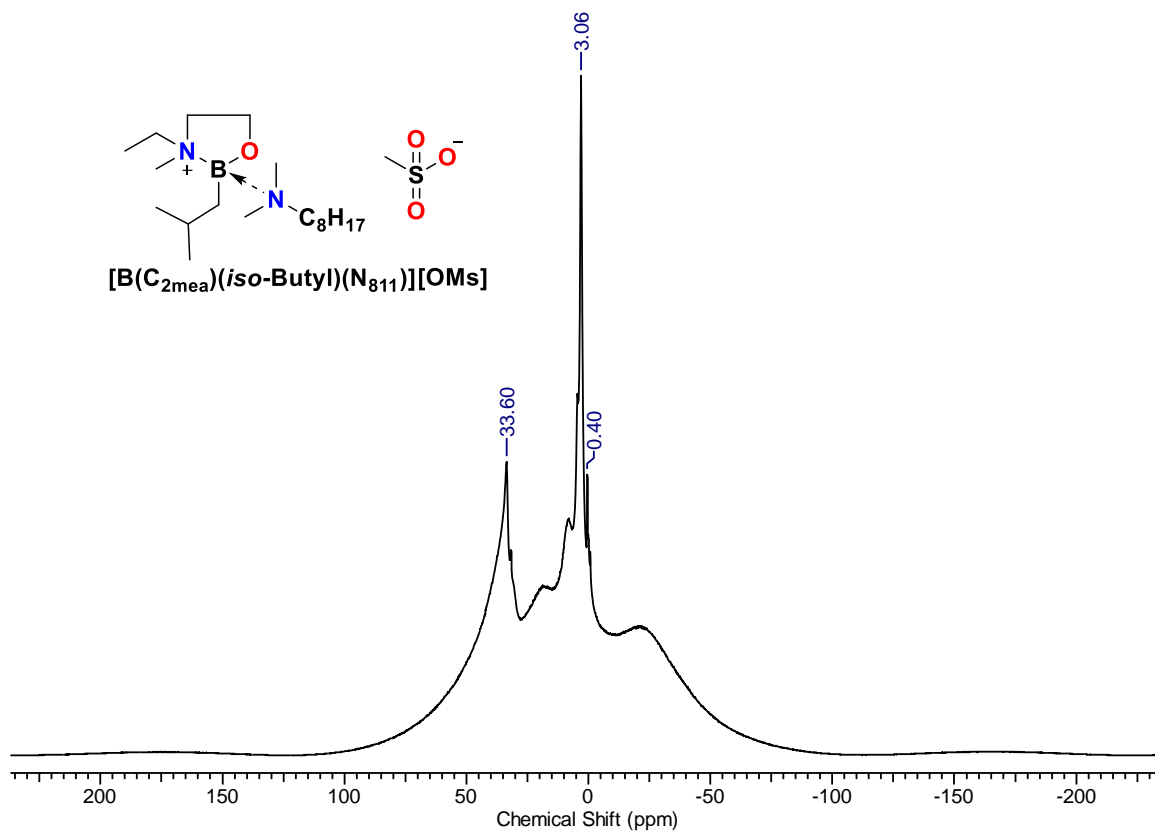

Figure S 24. <sup>11</sup>B NMR spectrum of [B(C<sub>2</sub>mea)(iso-butyl)(N<sub>811</sub>)] [OMs].

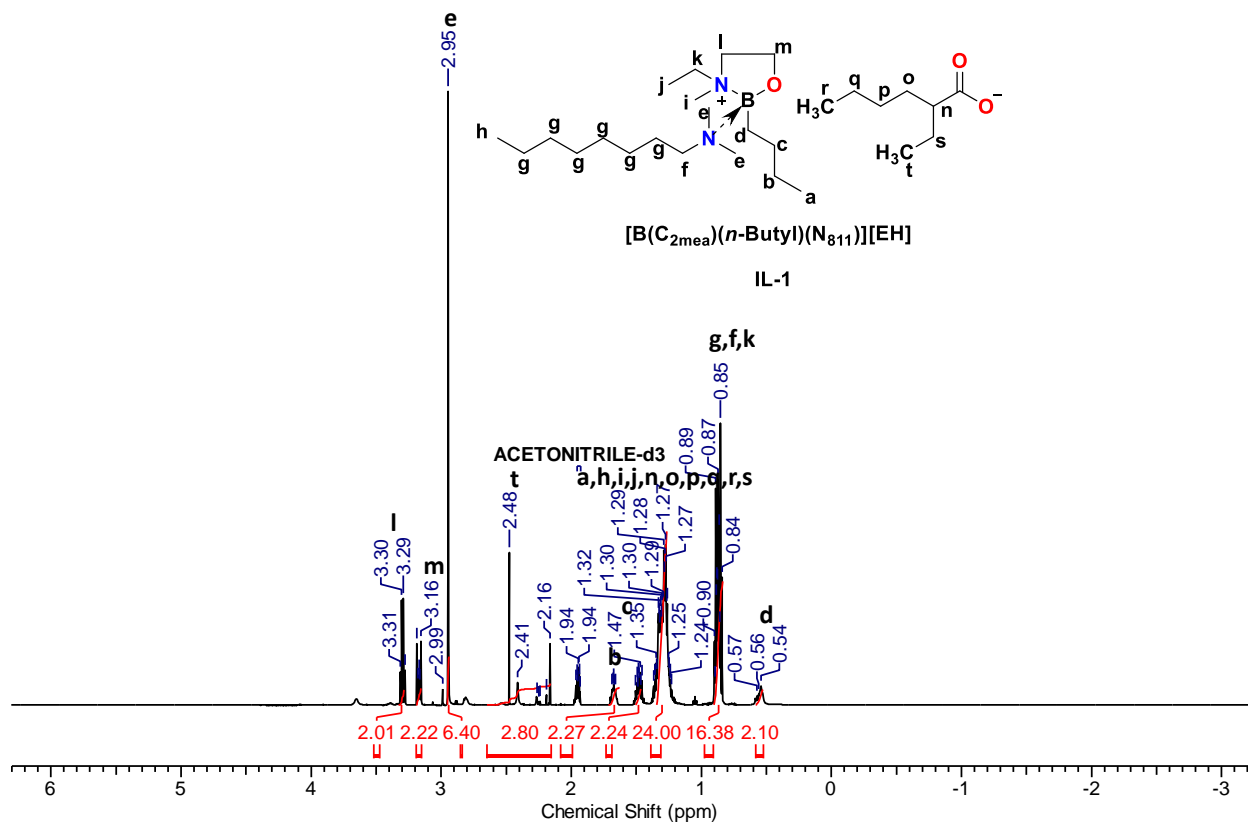

Figure S 25. <sup>1</sup>H NMR spectrum of IL-1 [B(C<sub>2</sub>mea)(n-butyl)(N<sub>811</sub>)] [EH].

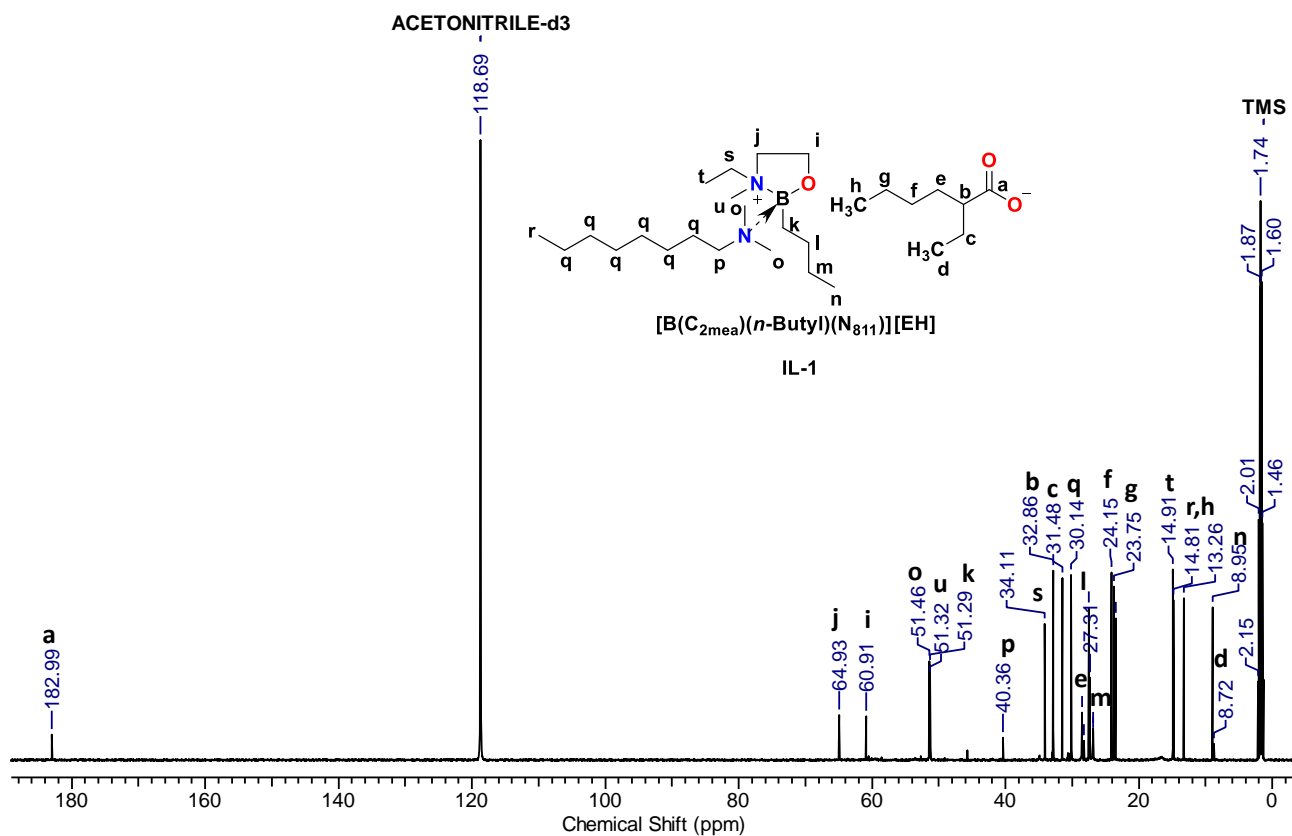

Figure S 26. <sup>13</sup>C NMR spectrum of IL-1  $[B(C_{2mea})(n\text{-butyl})(N_{811})][EH]$ .

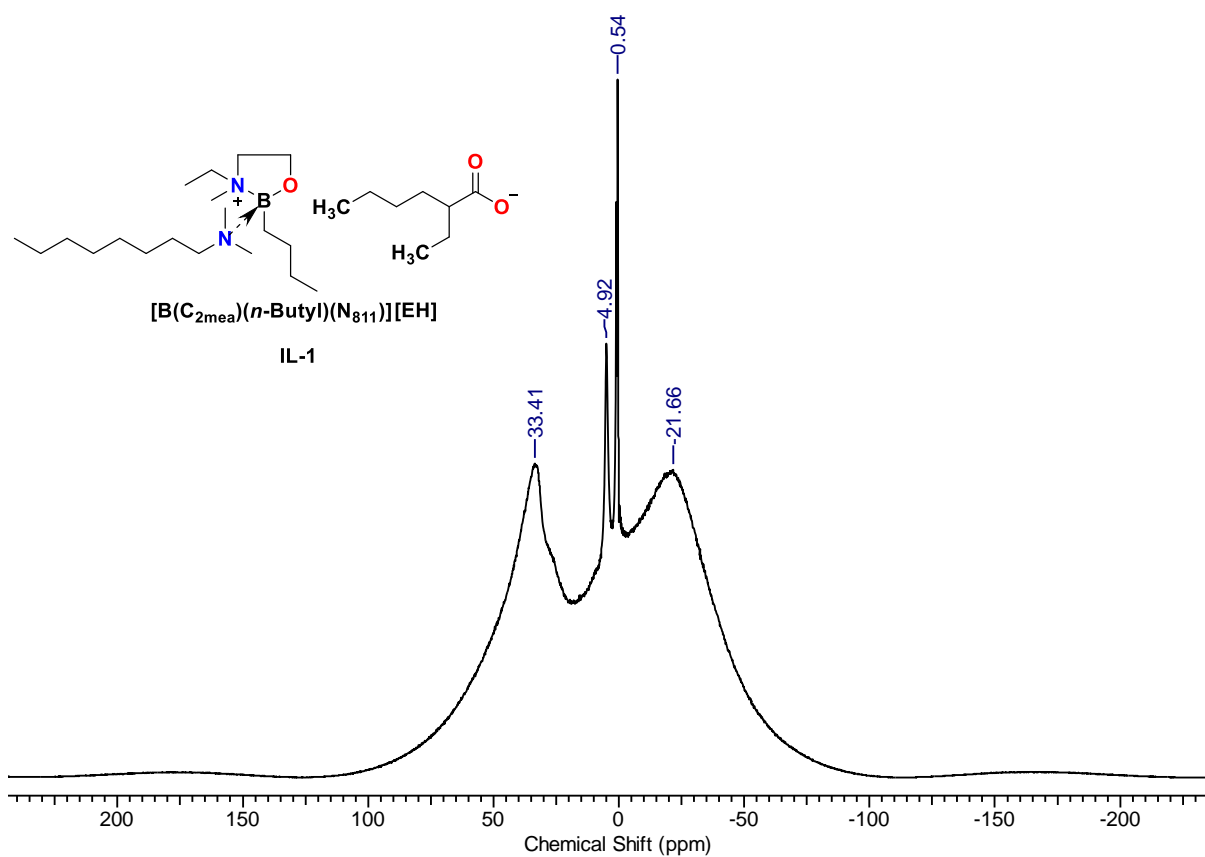

Figure S 27. <sup>11</sup>B NMR spectrum of IL-1  $[B(C_{2mea})(n\text{-butyl})(N_{811})][EH]$ .



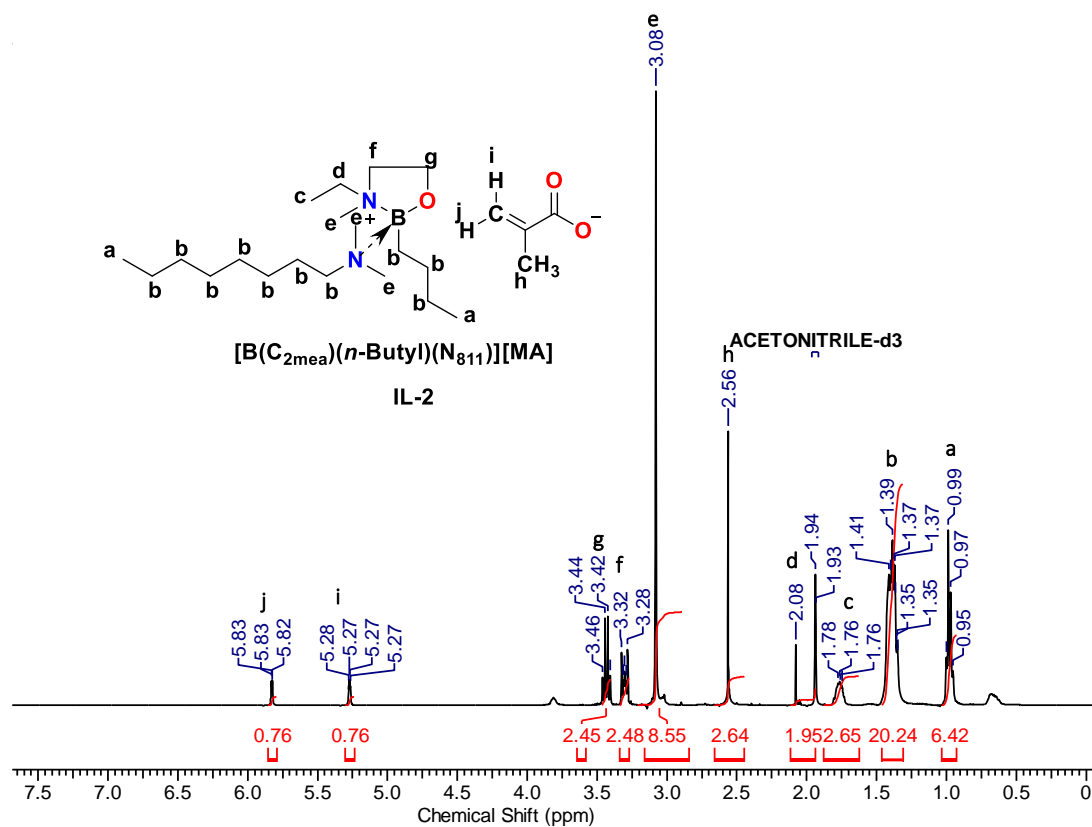

Figure S 28.  $^1\text{H}$  NMR spectrum of IL-2  $[\text{B}(\text{C}_{2\text{mea}})(n\text{-butyl})(\text{N}_{811})][\text{MA}]$ .

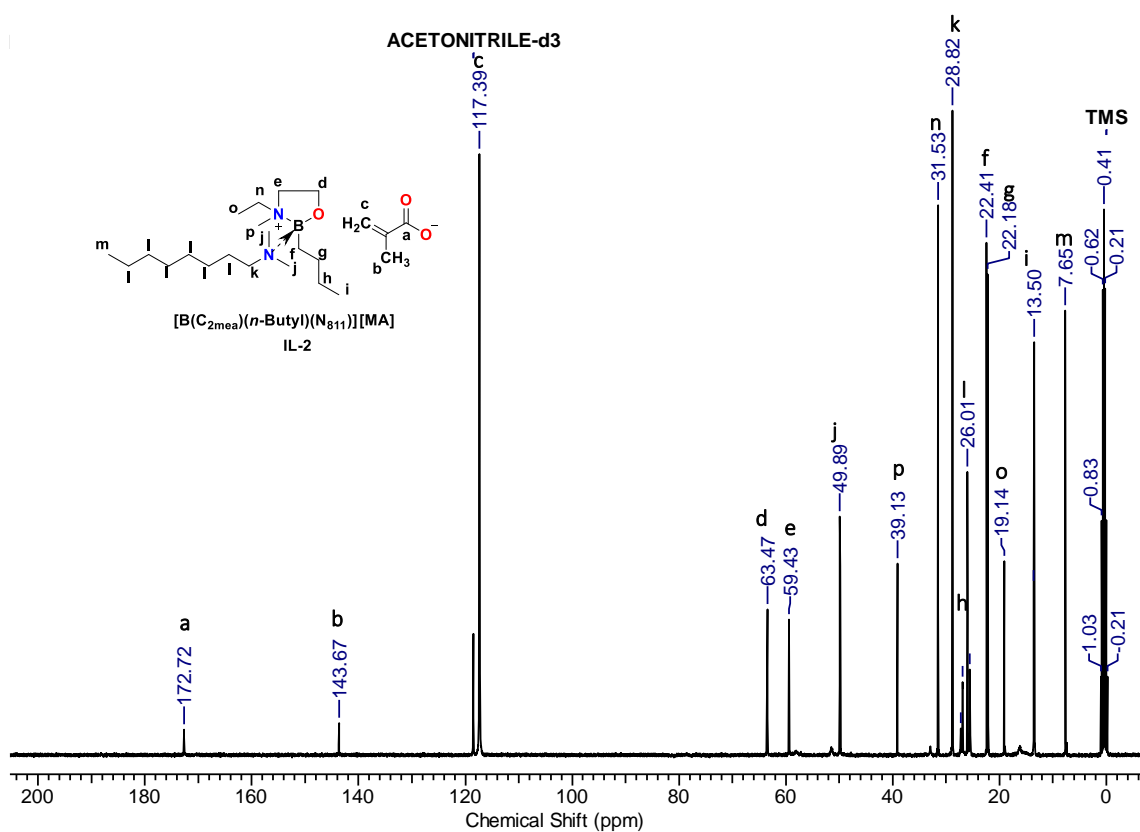

Figure S 29.  $^{13}\text{C}$  NMR spectrum of IL-2  $[\text{B}(\text{C}_{2\text{mea}})(n\text{-butyl})(\text{N}_{811})][\text{MA}]$ .

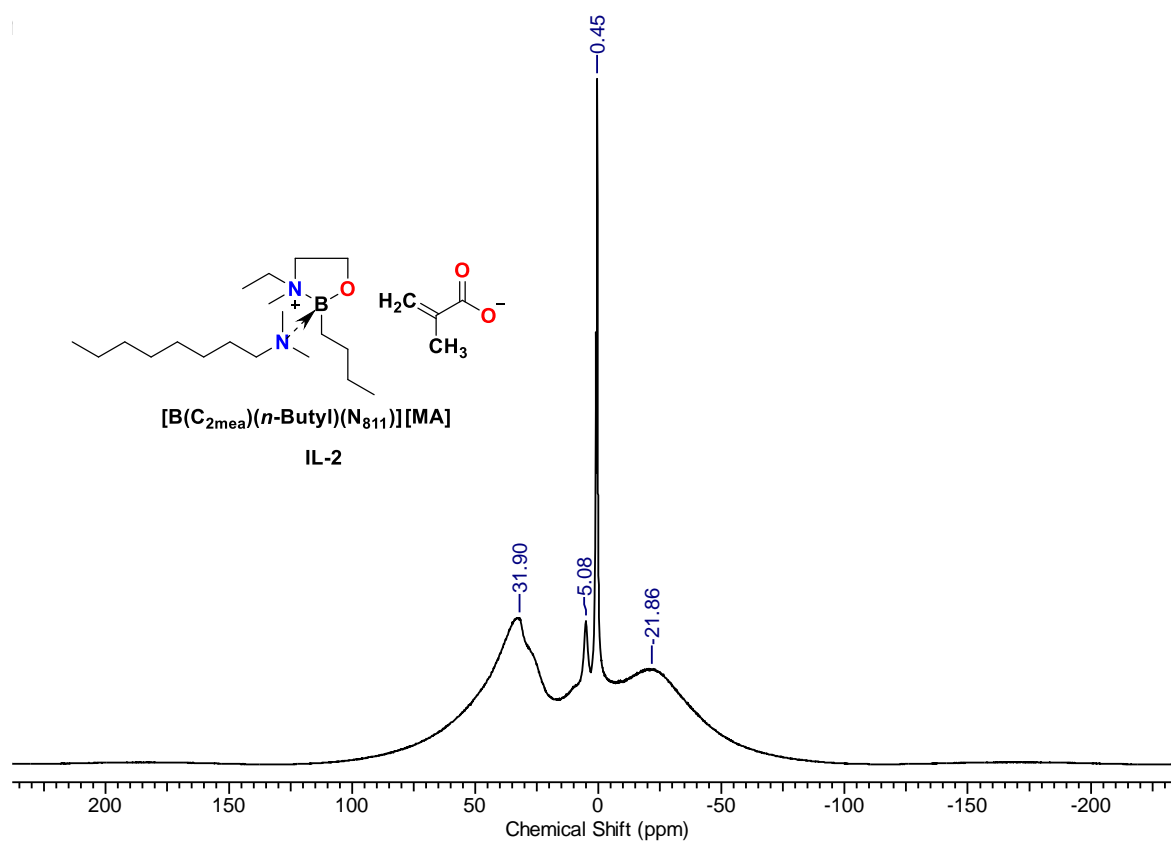

Figure S 30.  $^{11}B$  NMR spectrum of IL-2  $[B(C_{2mea})(n\text{-butyl})(N_{811})][MA]$ .

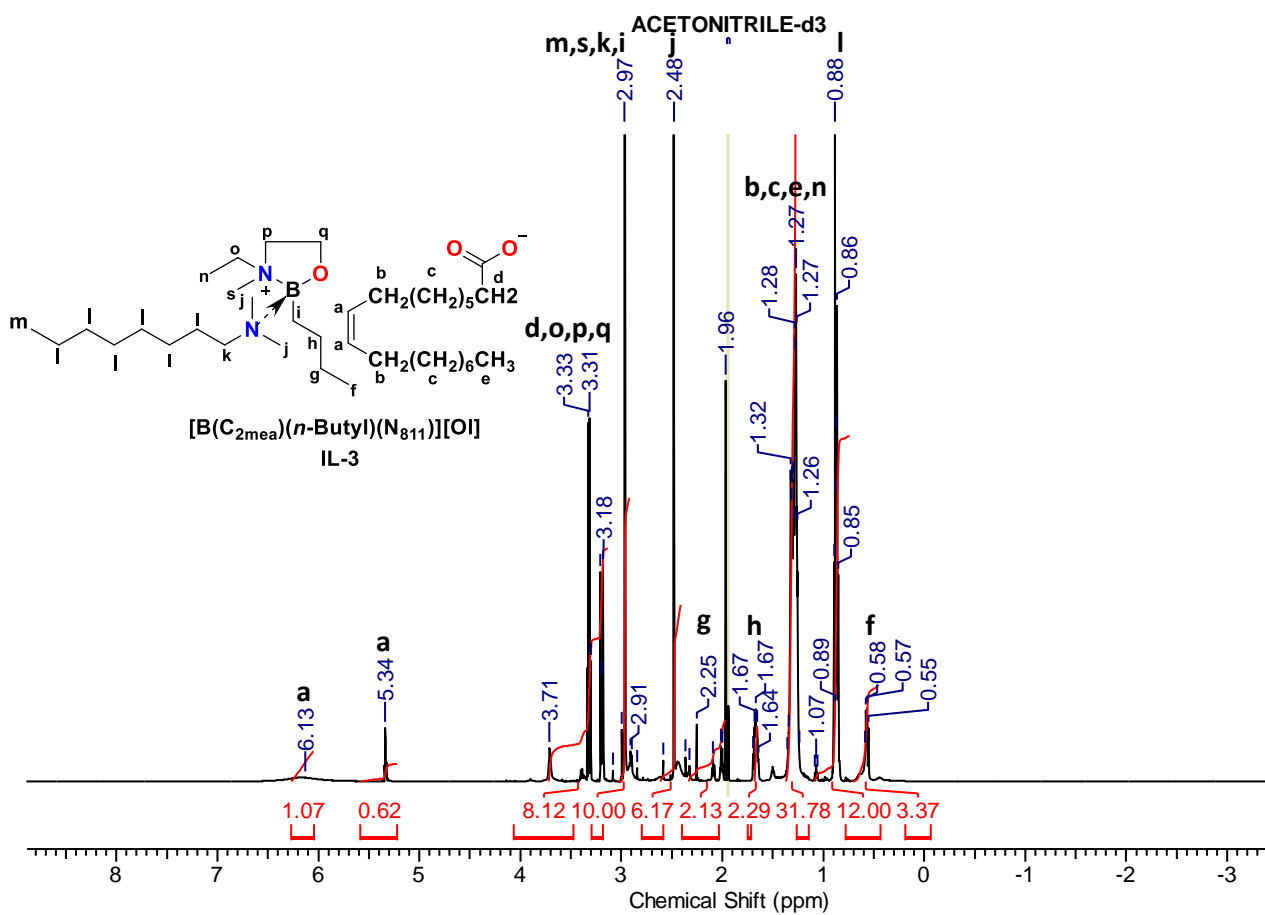

Figure S 31.  $^1H$  NMR spectrum of IL-3  $[B(C_{2mea})(n\text{-butyl})(N_{811})][OI]$ .

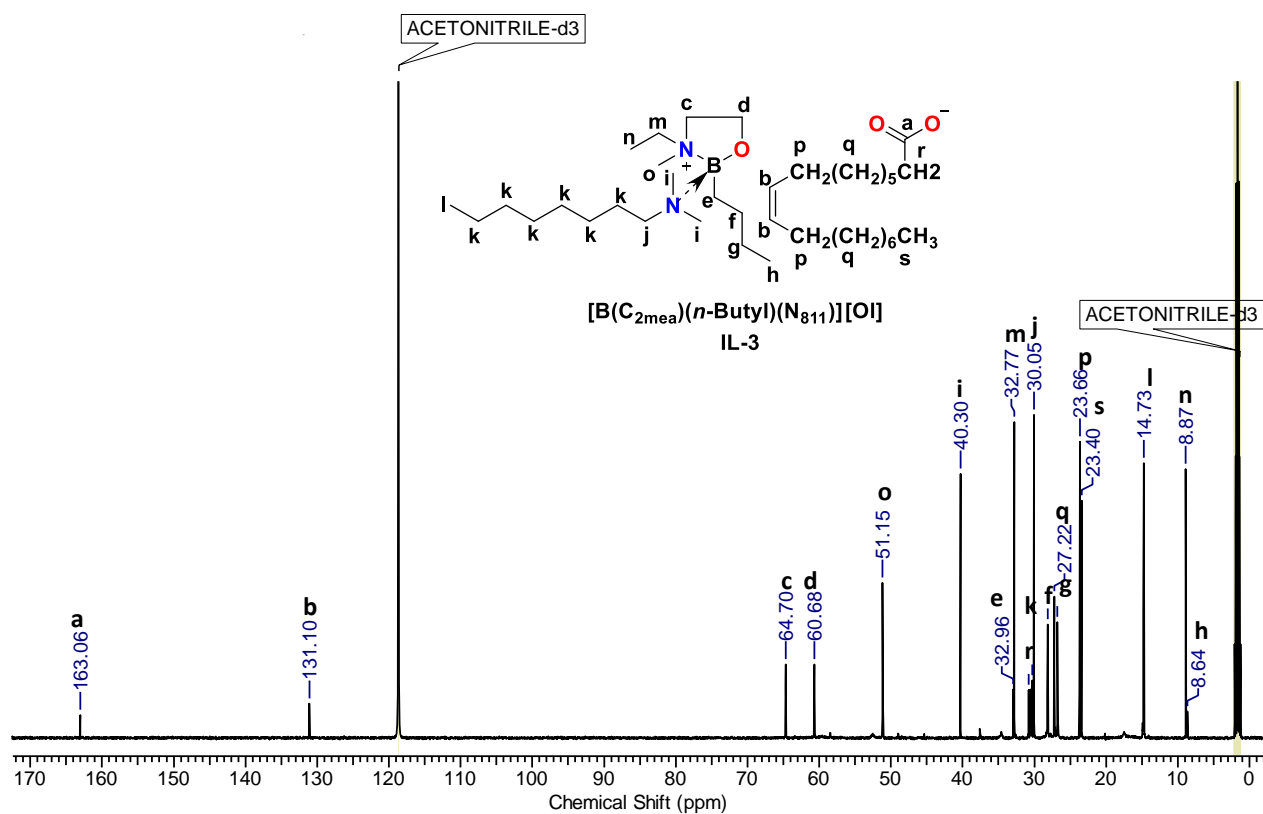

Figure S 32.  $^{13}\text{C}$  NMR spectrum of IL-3  $[\text{B}(\text{C}_{2\text{mea}})(n\text{-butyl})(\text{N}_{811})][\text{OI}]$ .

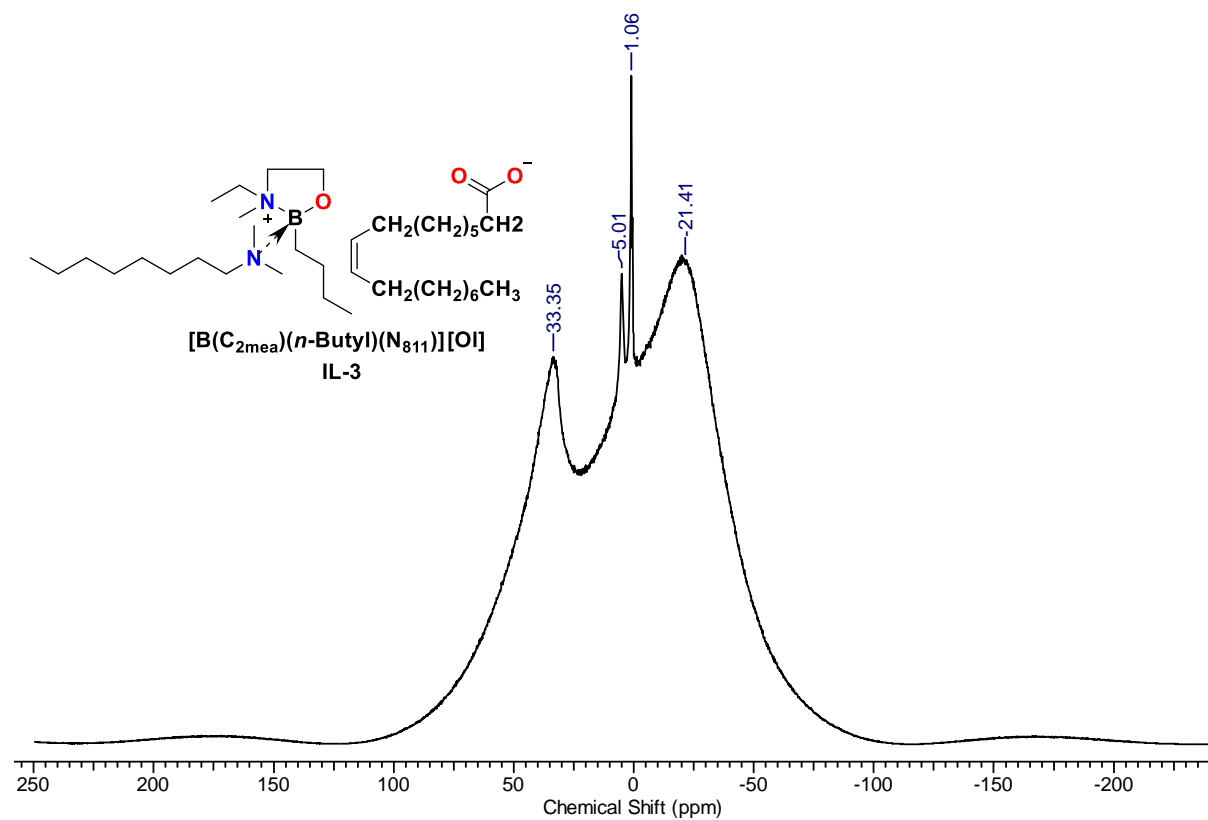

Figure S 33.  $^{11}\text{B}$  NMR spectrum of IL-3  $[\text{B}(\text{C}_{2\text{mea}})(n\text{-butyl})(\text{N}_{811})][\text{OI}]$ .

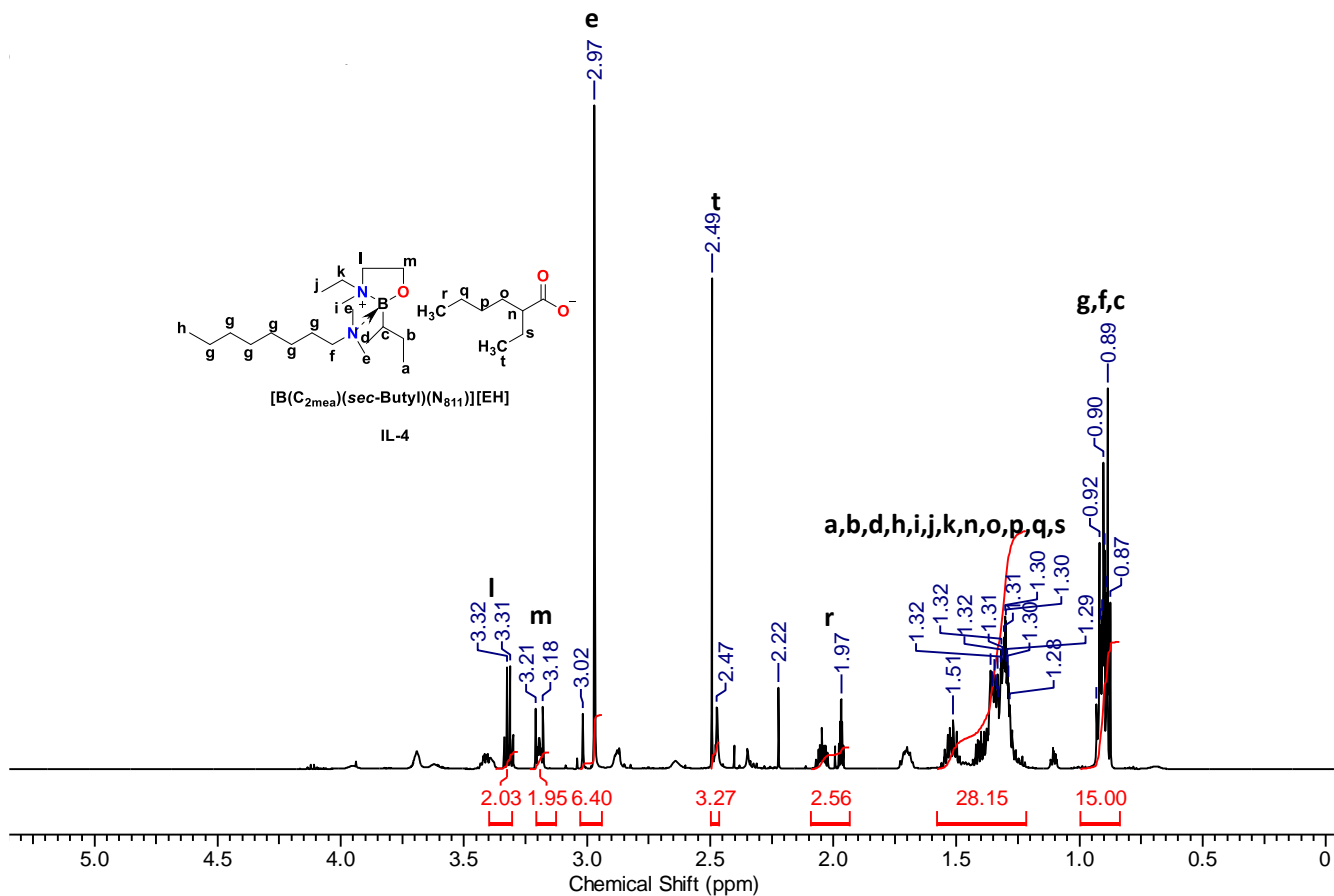

Figure S 34. <sup>1</sup>H NMR spectrum of IL-4  $[B(C_{2mea})(sec-butyl)(N_{811})][EH]$ .

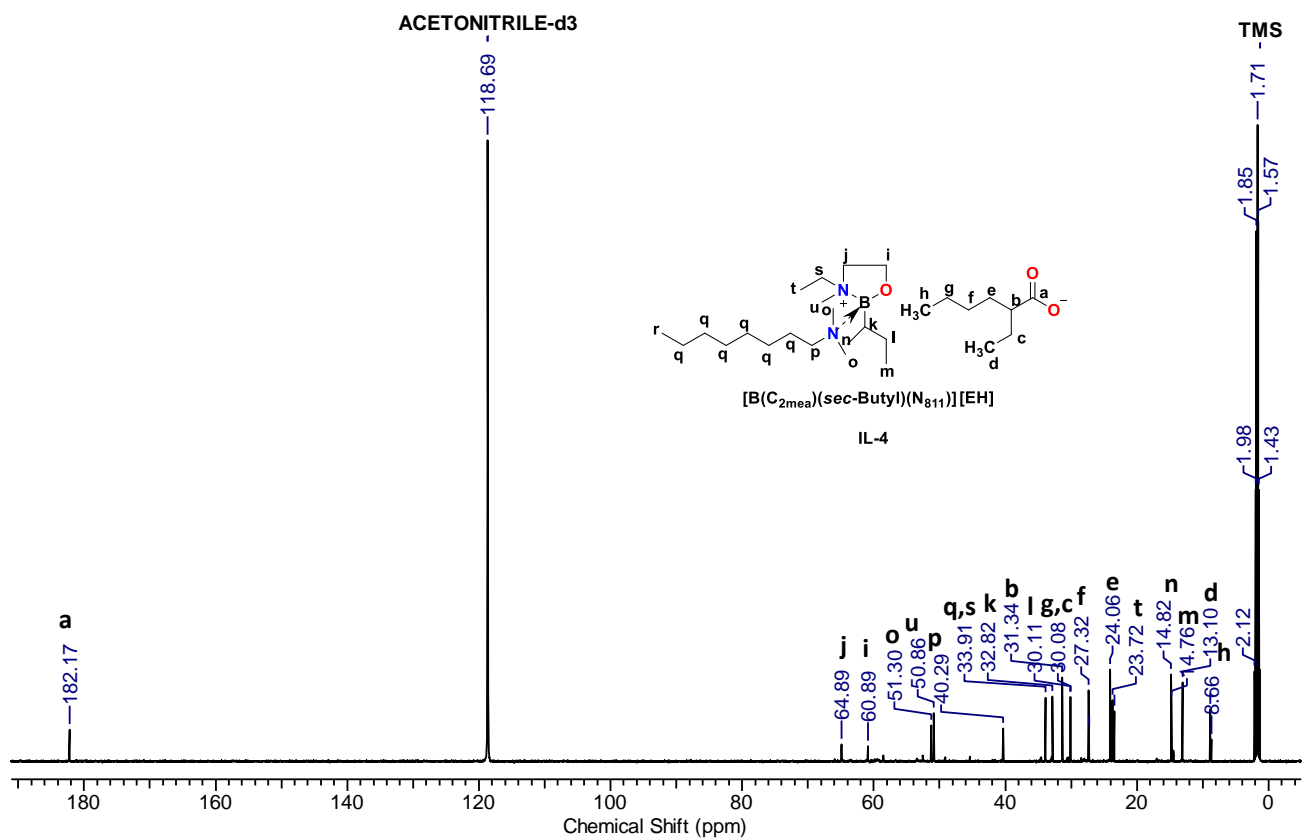

Figure S 35.  $^{13}\text{C}$  NMR spectrum of IL-4  $[\text{B}(\text{C}_{2\text{mea}})(\text{sec-butyl})(\text{N}_{811})][\text{EH}]$ .

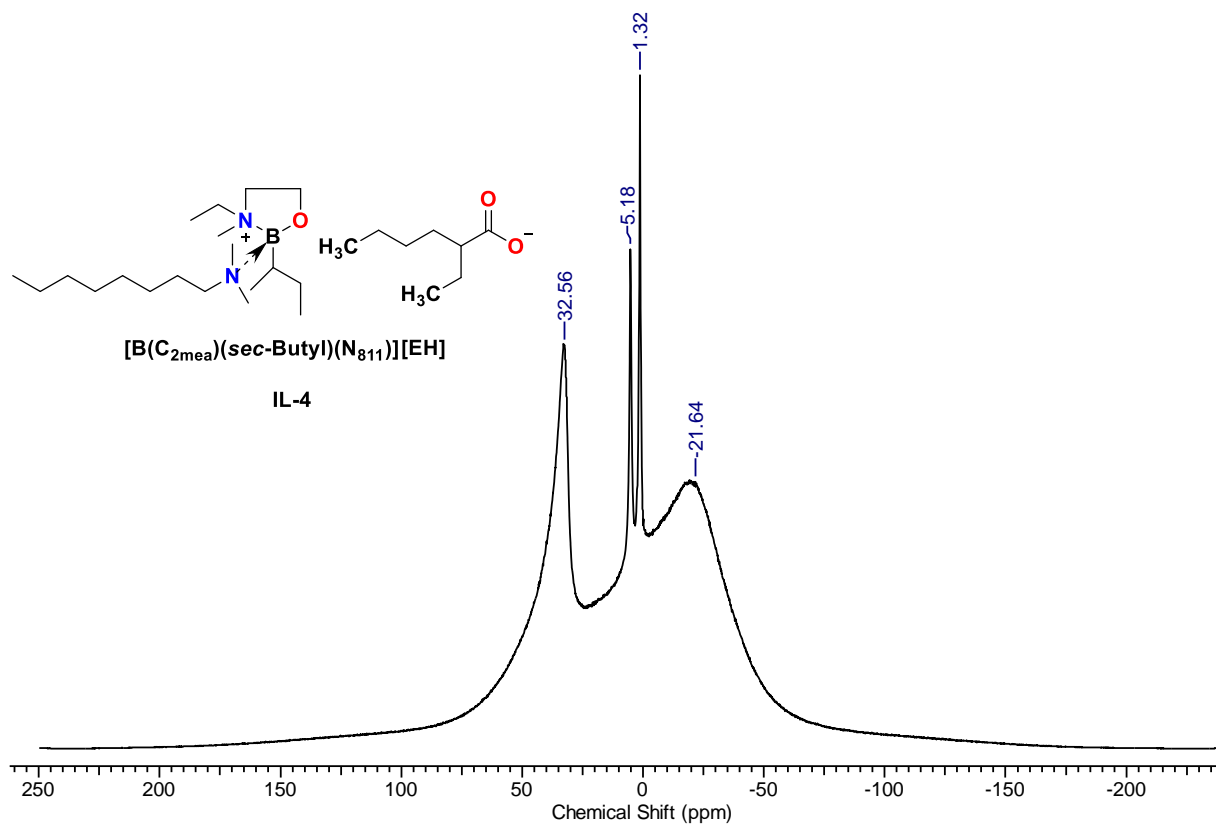

Figure S 36.  $^{11}\text{B}$  NMR spectrum of IL-4  $[\text{B}(\text{C}_{2\text{mea}})(\text{sec-butyl})(\text{N}_{811})][\text{EH}]$ .

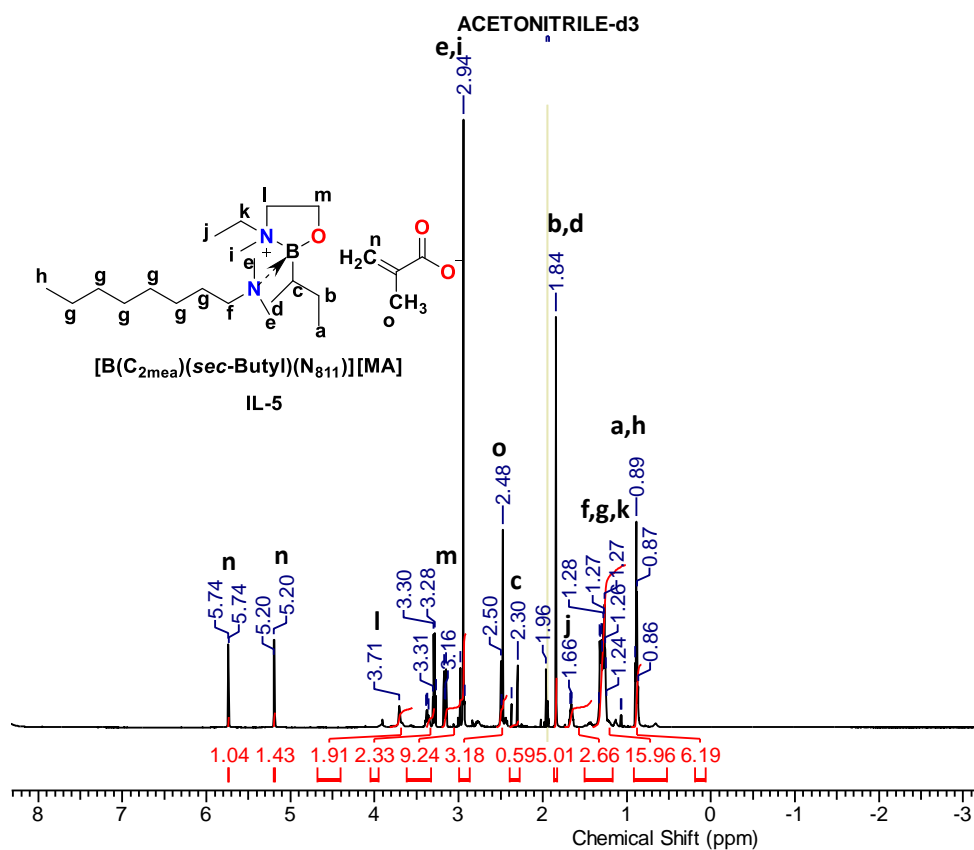

Figure S 37.  $^1\text{H}$  NMR spectrum of IL-5  $[\text{B}(\text{C}_{2\text{mea}})(\text{sec-butyl})(\text{N}_{811})][\text{MA}]$ .

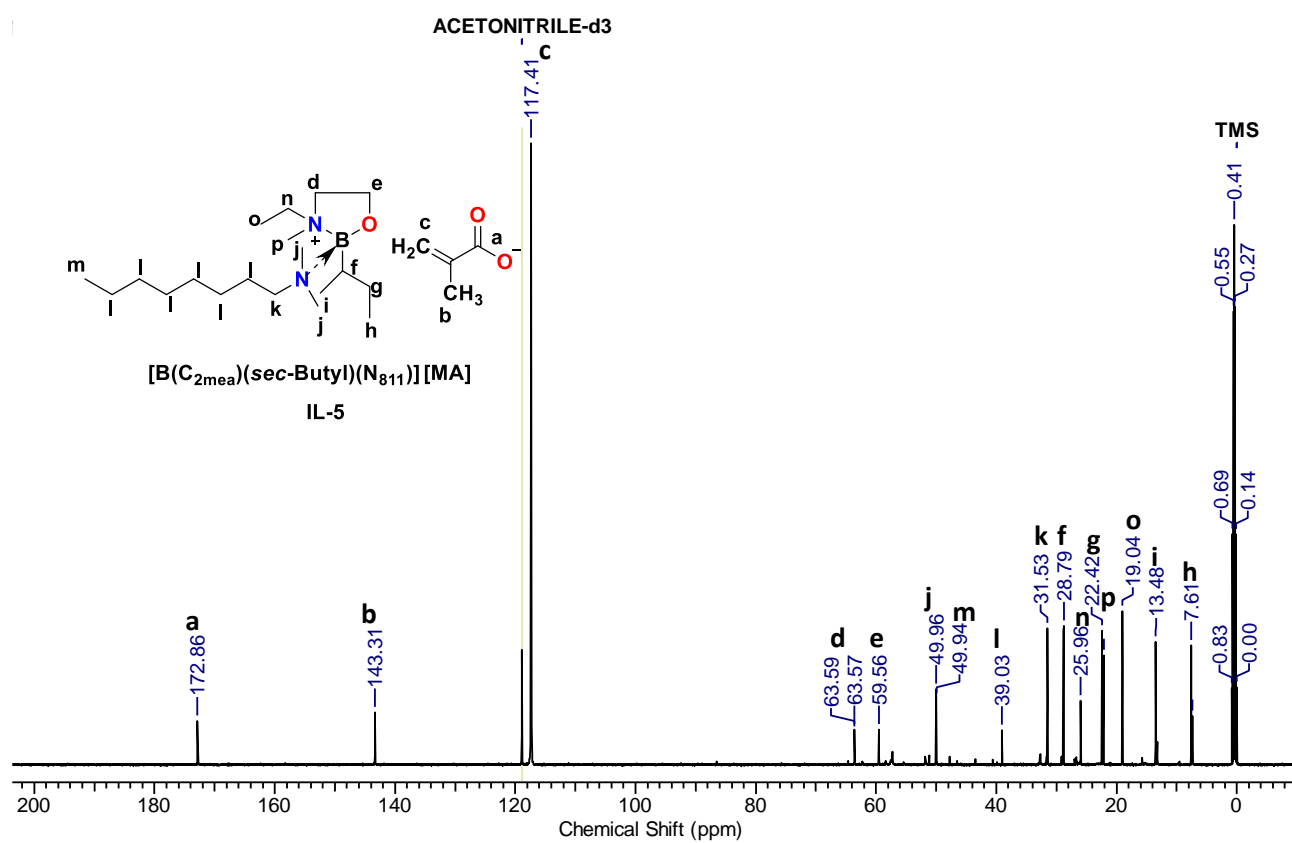

Figure S 38.  $^{13}C$  NMR spectrum of IL-5  $[B(C_{2mea})(sec\text{-}butyl)(N_{811})][MA]$ .

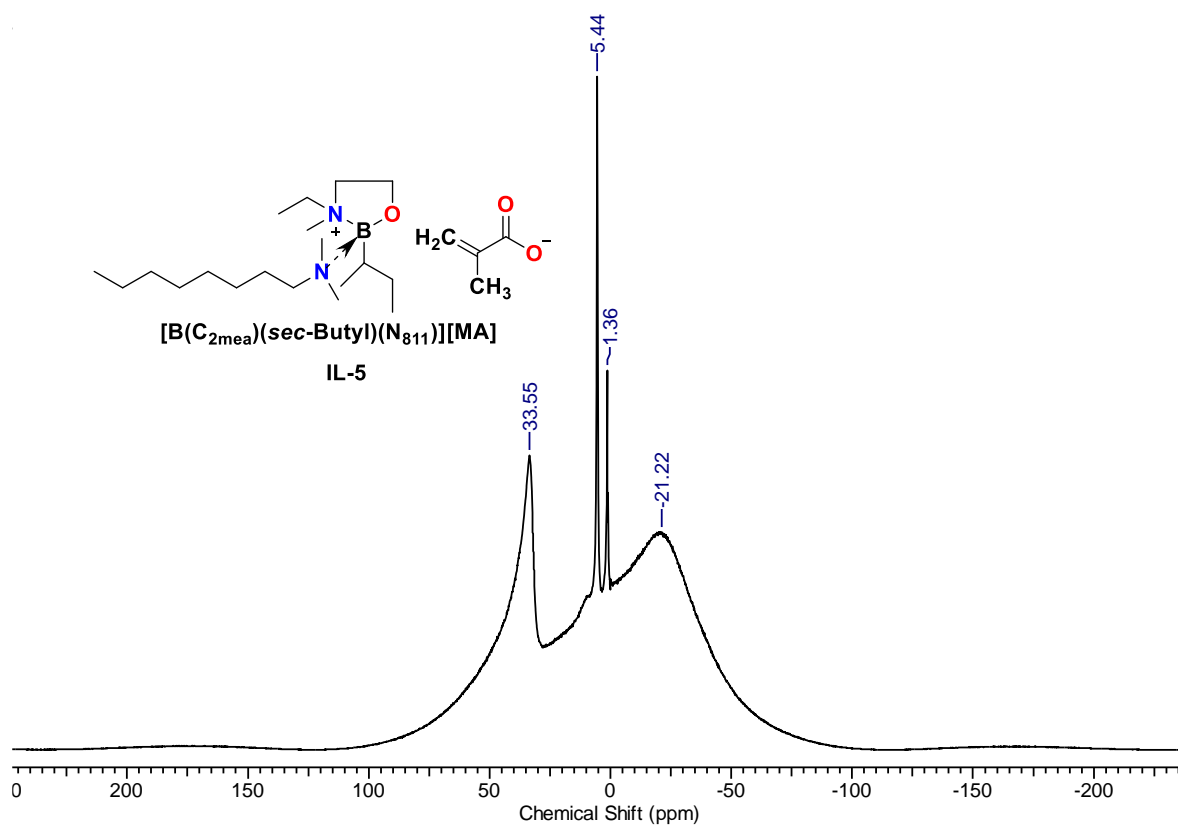

Figure S 39.  $^{11}B$  NMR spectrum of IL-5  $[B(C_{2mea})(sec\text{-}butyl)(N_{811})][MA]$ .

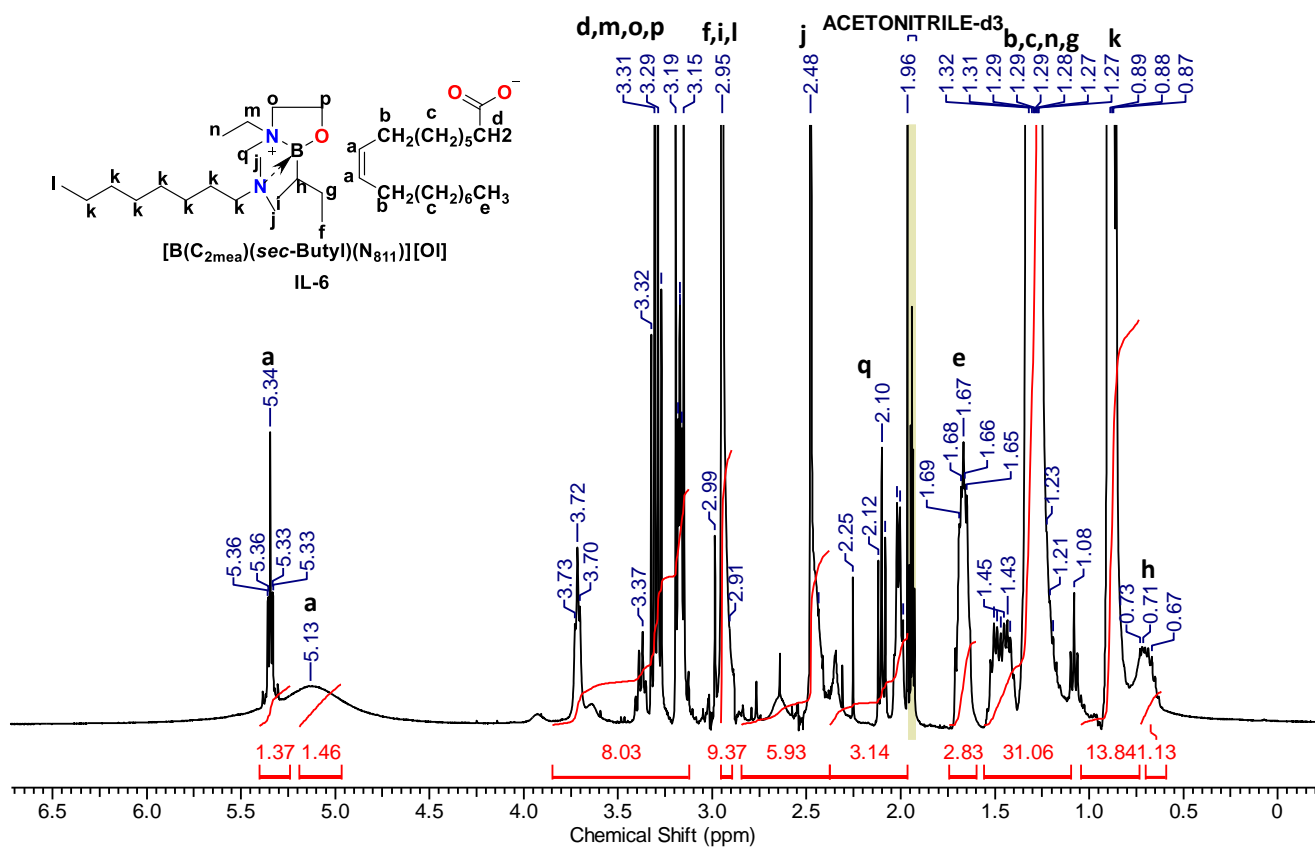

Figure S 40. <sup>1</sup>H NMR spectrum of IL-6 [B(C<sub>2</sub>mea)(sec-butyl)(N<sub>811</sub>)] [OI].

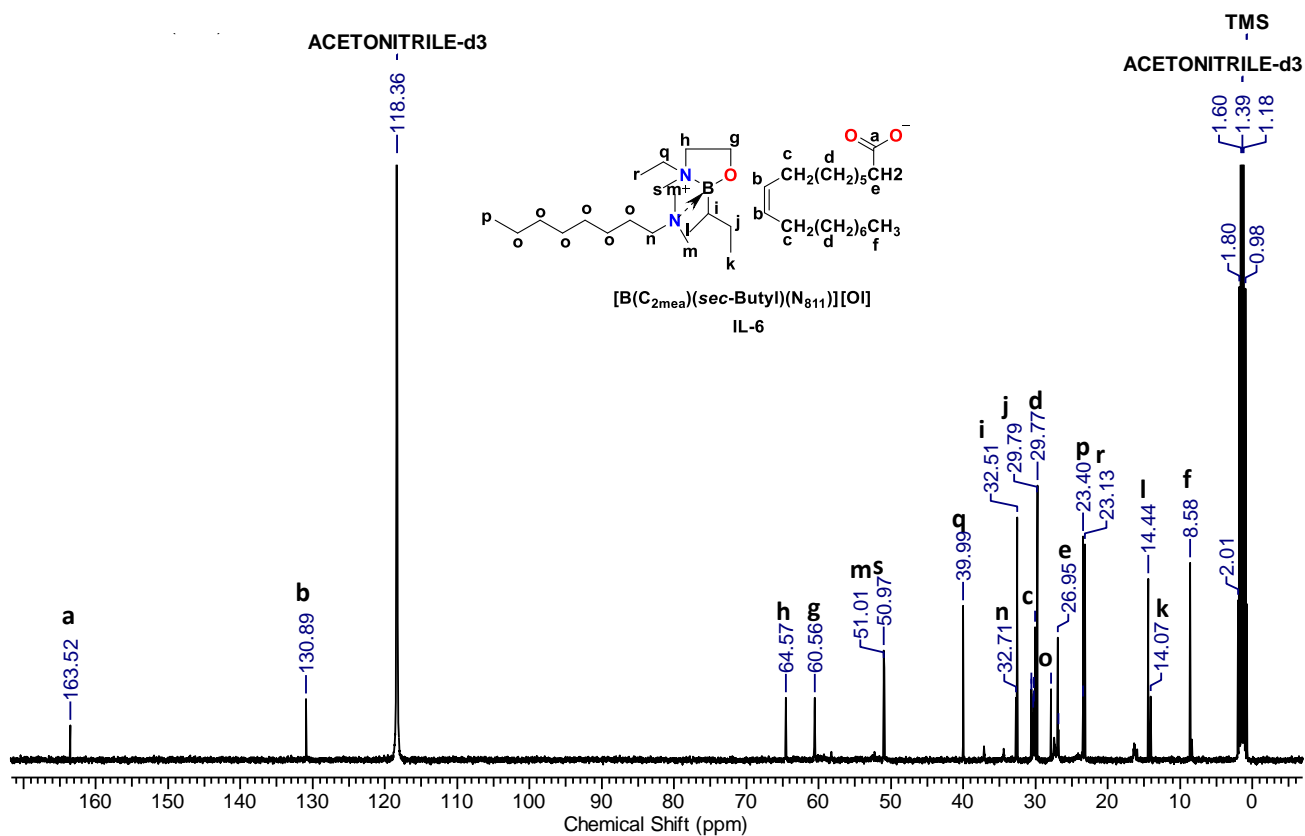

Figure S 41. <sup>13</sup>C NMR spectrum of IL-6 [B(C<sub>2</sub>mea)(sec-butyl)(N<sub>811</sub>)] [OI].

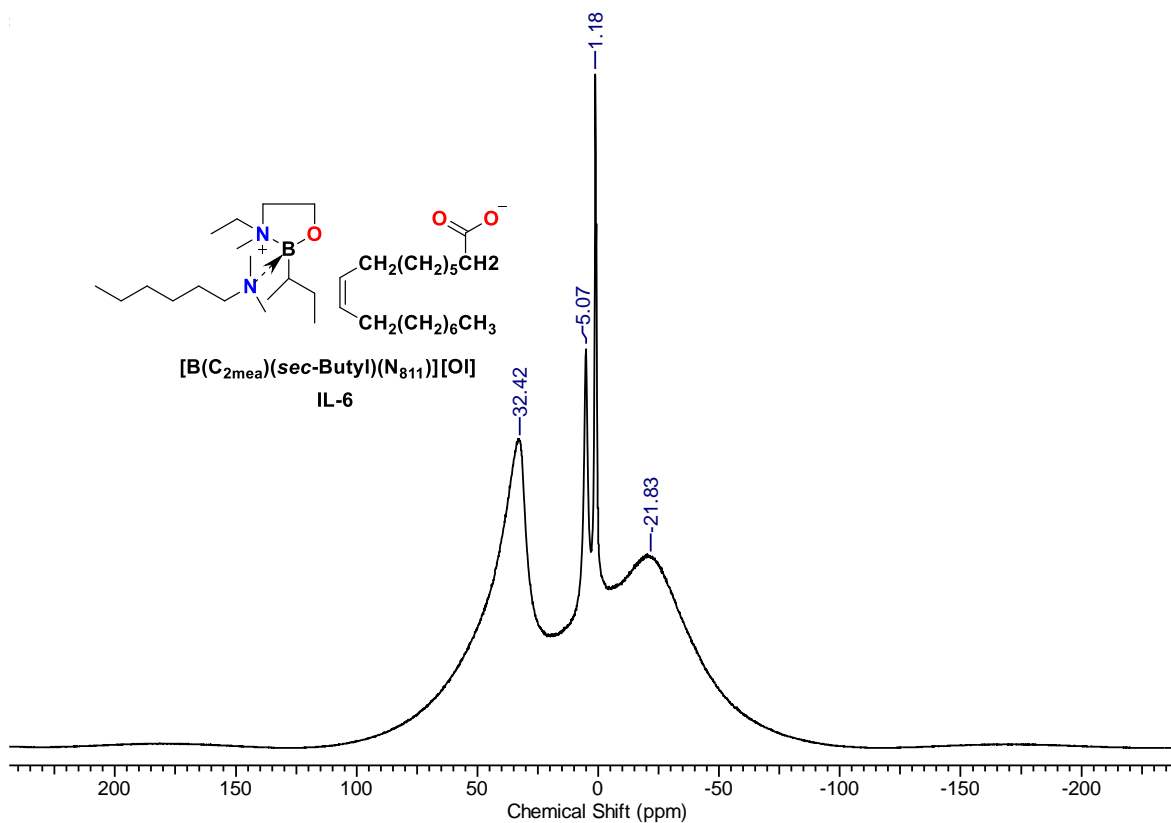

Figure S 42. <sup>11</sup>B NMR spectrum of IL-6 [B(C<sub>2</sub>mea)(*sec*-butyl)(N<sub>811</sub>)] [OI].

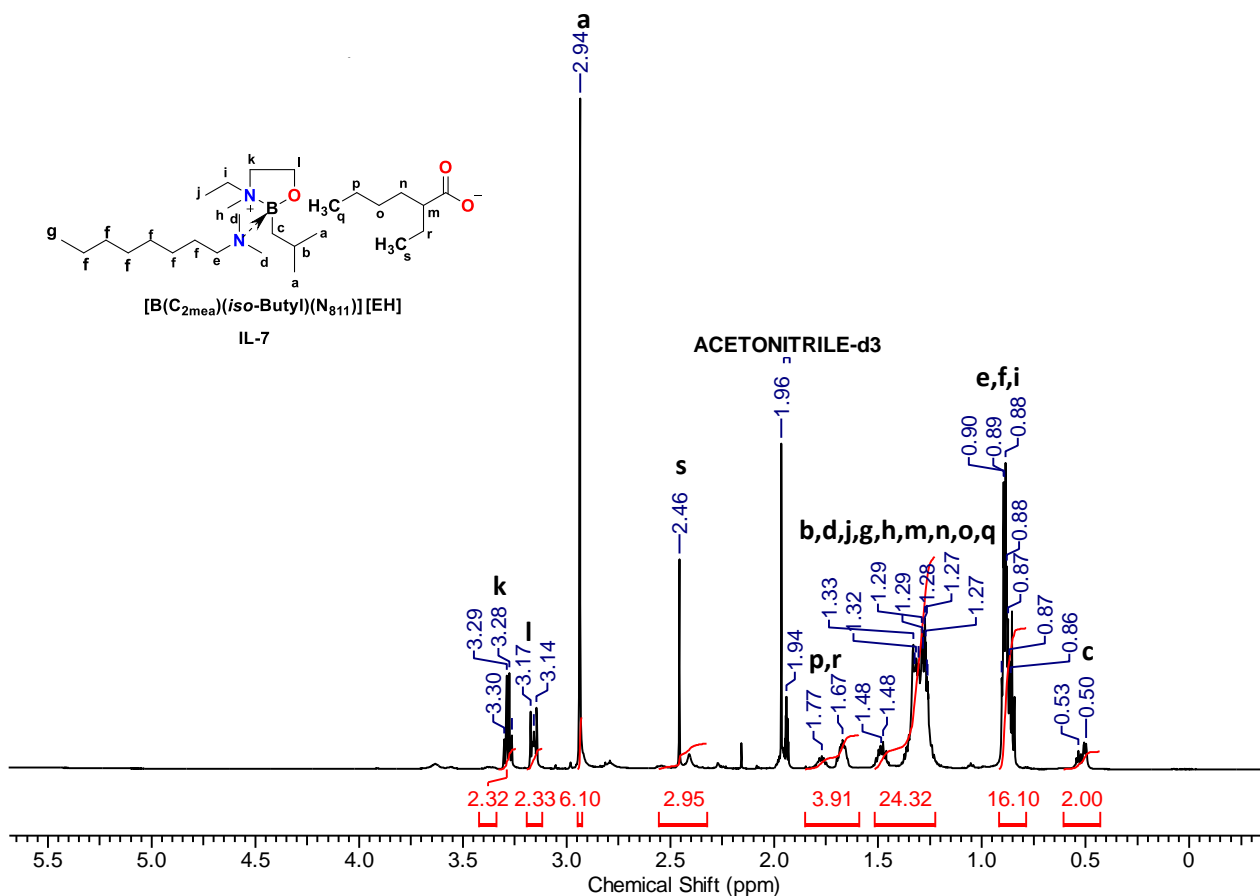

Figure S 43. <sup>1</sup>H NMR spectrum of IL-7 [B(C<sub>2</sub>mea)(*iso*-butyl)(N<sub>811</sub>)] [EH].



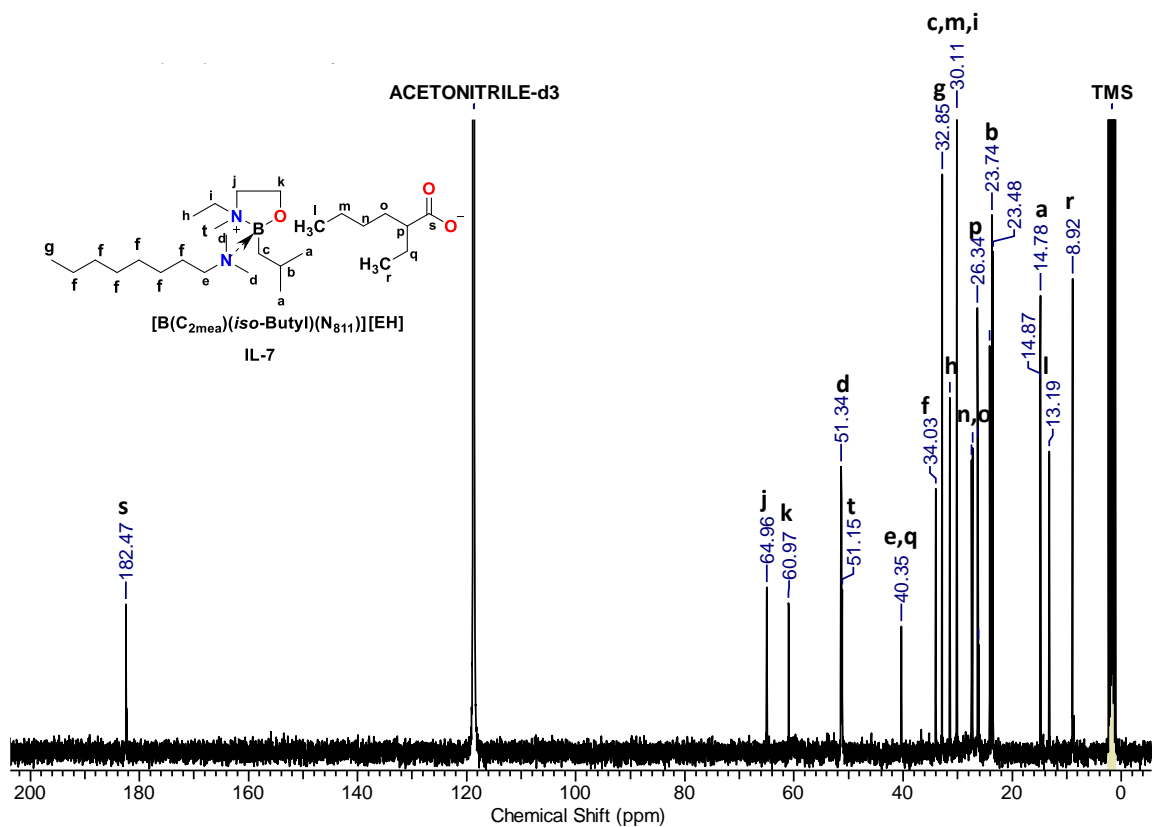

Figure S 44. <sup>13</sup>C NMR spectrum of IL-7 [B(C<sub>2</sub>mea)(iso-butyl)(N<sub>811</sub>)] [EH].

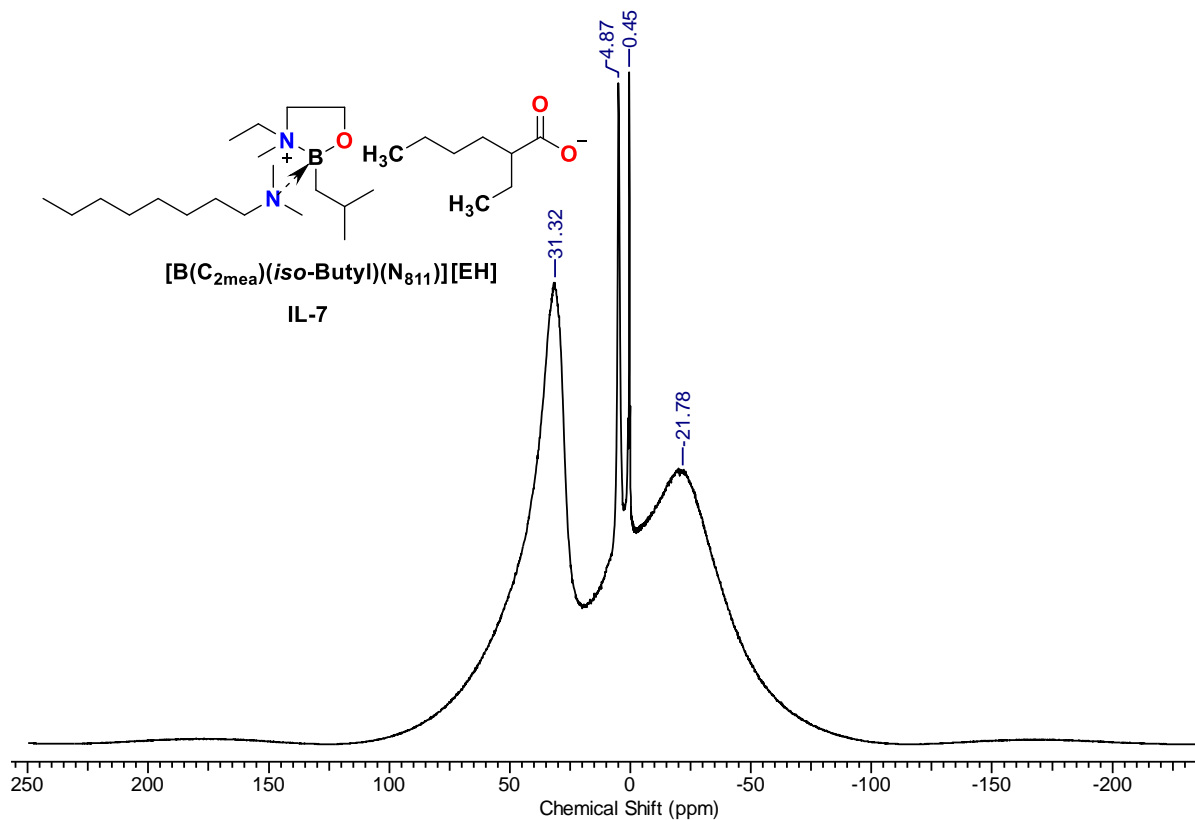

Figure S 45. <sup>11</sup>B NMR spectrum of IL-7 [B(C<sub>2</sub>mea)(iso-butyl)(N<sub>811</sub>)] [EH].

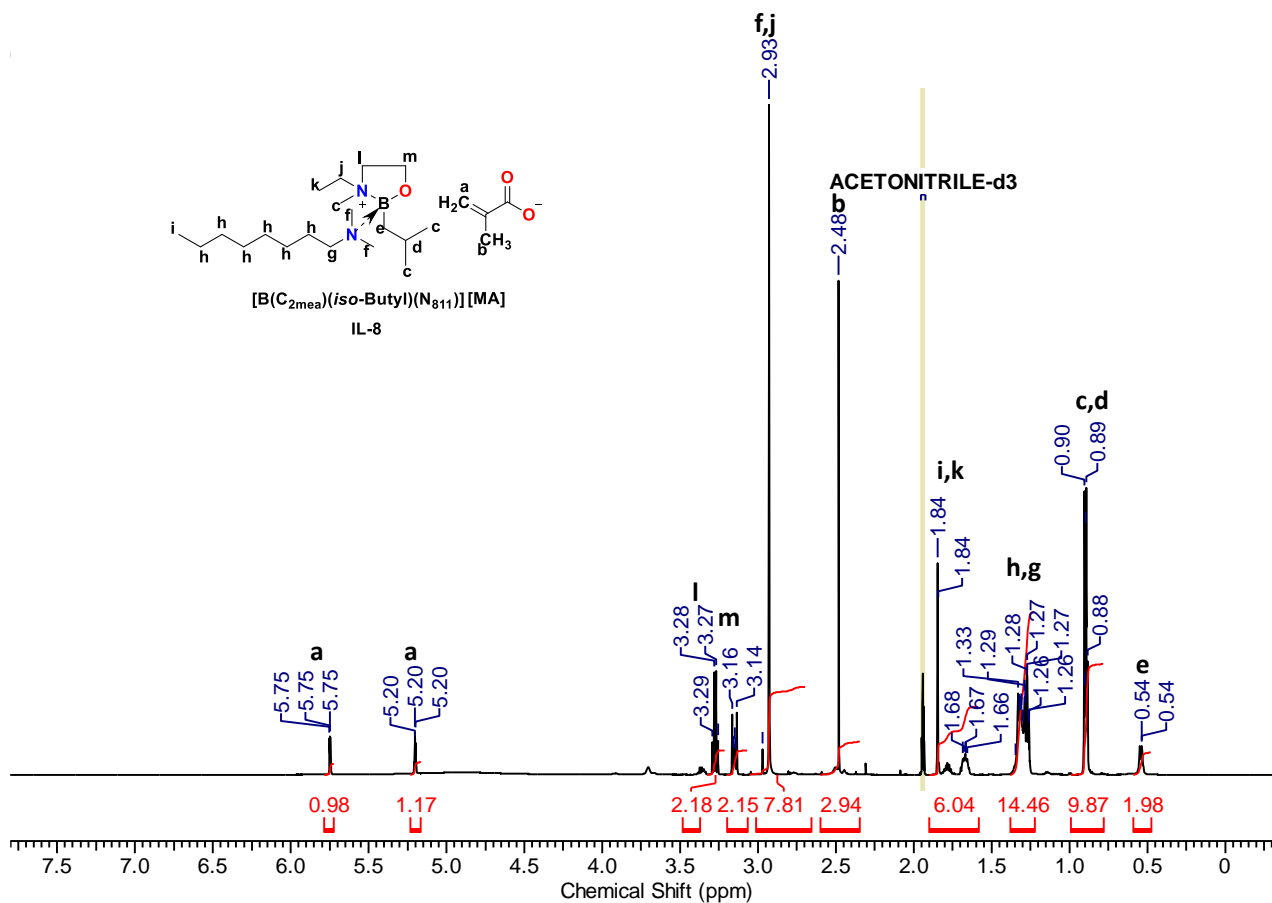

Figure S 46.  $^1\text{H}$  NMR spectrum of IL-8  $[\text{B}(\text{C}_{2\text{mea}})(\text{iso-butyl})(\text{N}_{811})][\text{MA}]$ .

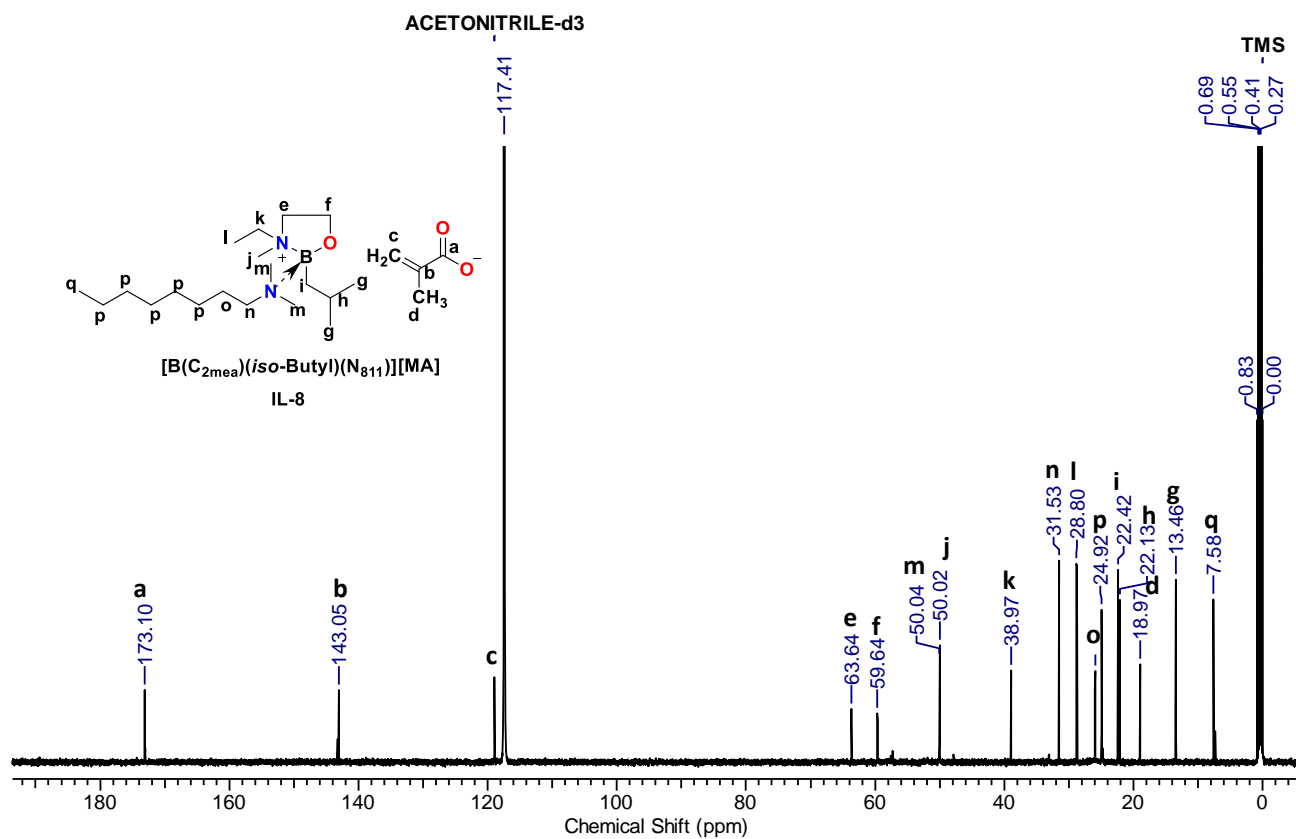

Figure S 47.  $^{13}\text{C}$  NMR spectrum of IL-8  $[\text{B}(\text{C}_{2\text{mea}})(\text{iso-butyl})(\text{N}_{811})][\text{MA}]$ .

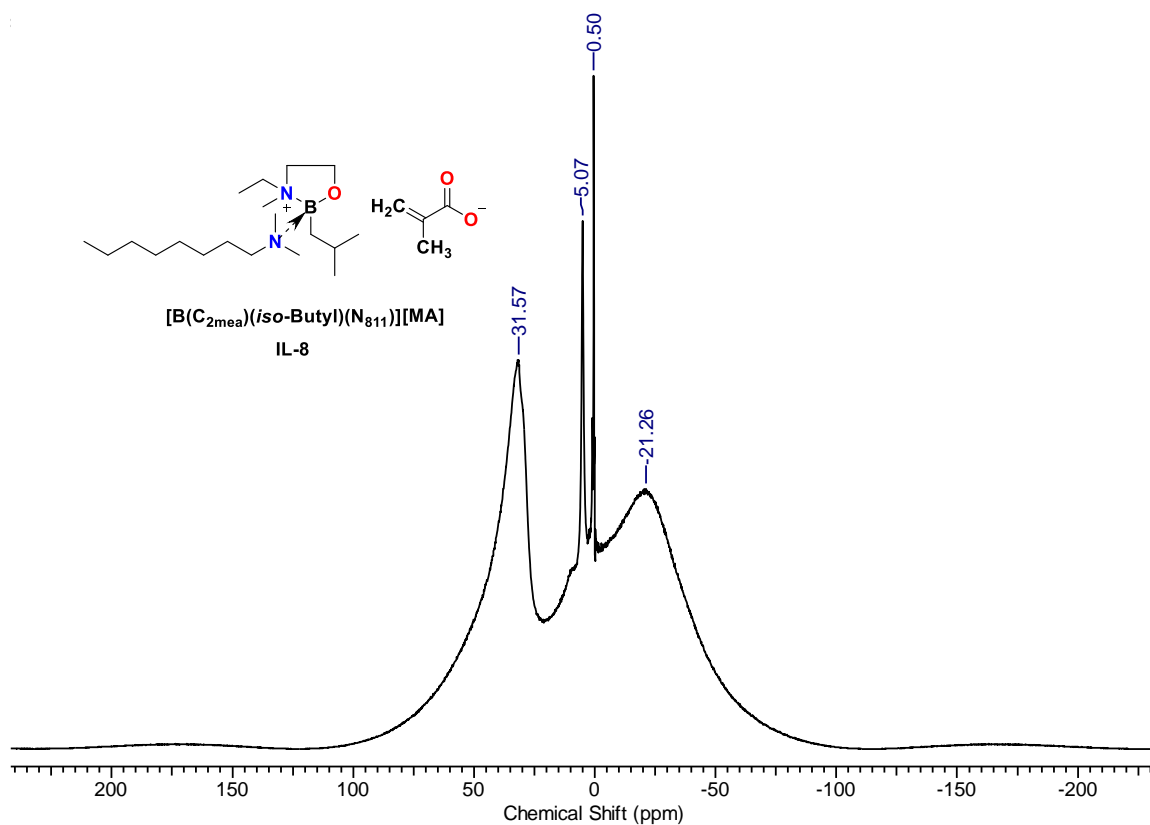

Figure S 48.  $^{11}B$  NMR spectrum of IL-8  $[B(C_{2mea})(iso-butyl)(N_{811})][MA]$ .

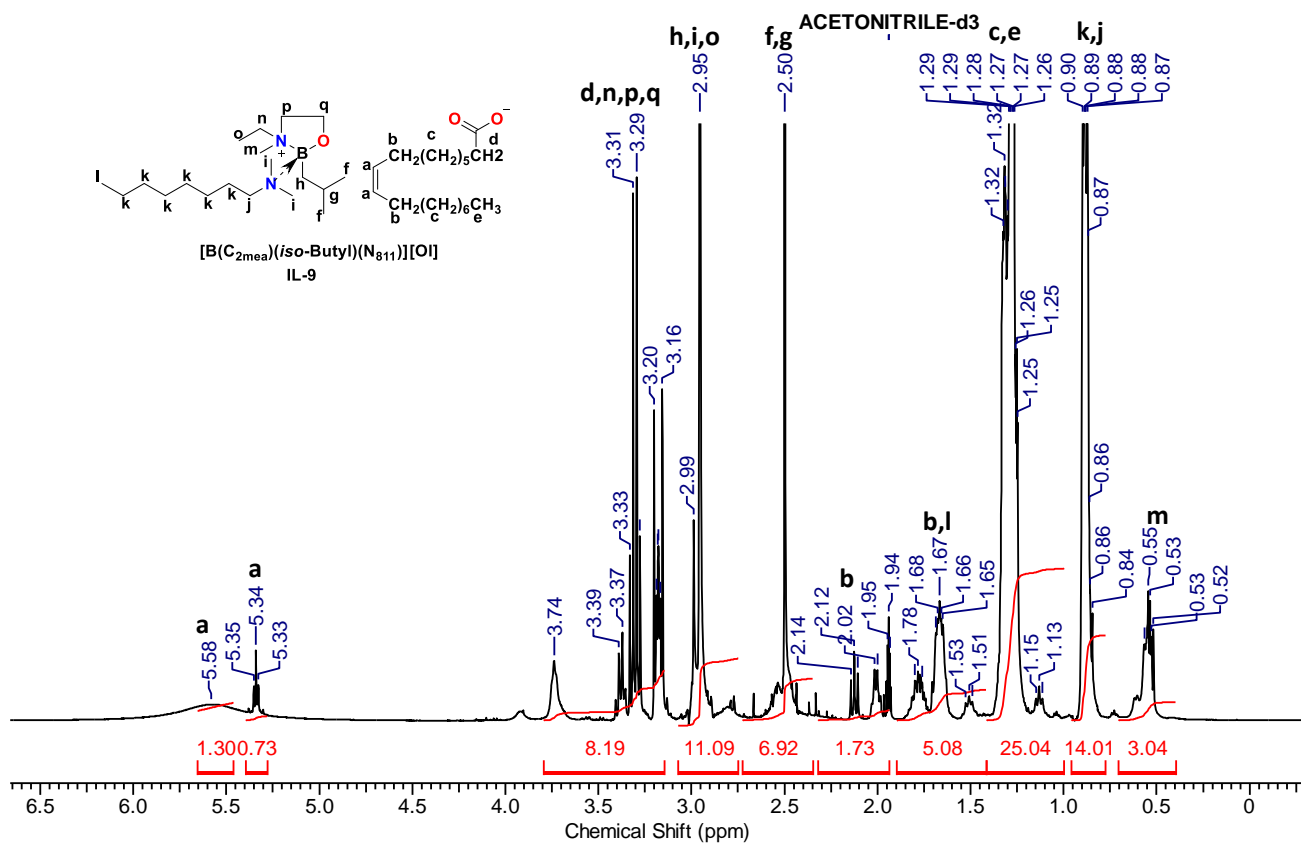

Figure S 49.  $^1H$  NMR spectrum of IL-9  $[B(C_{2mea})(iso-butyl)(N_{811})][OI]$ .

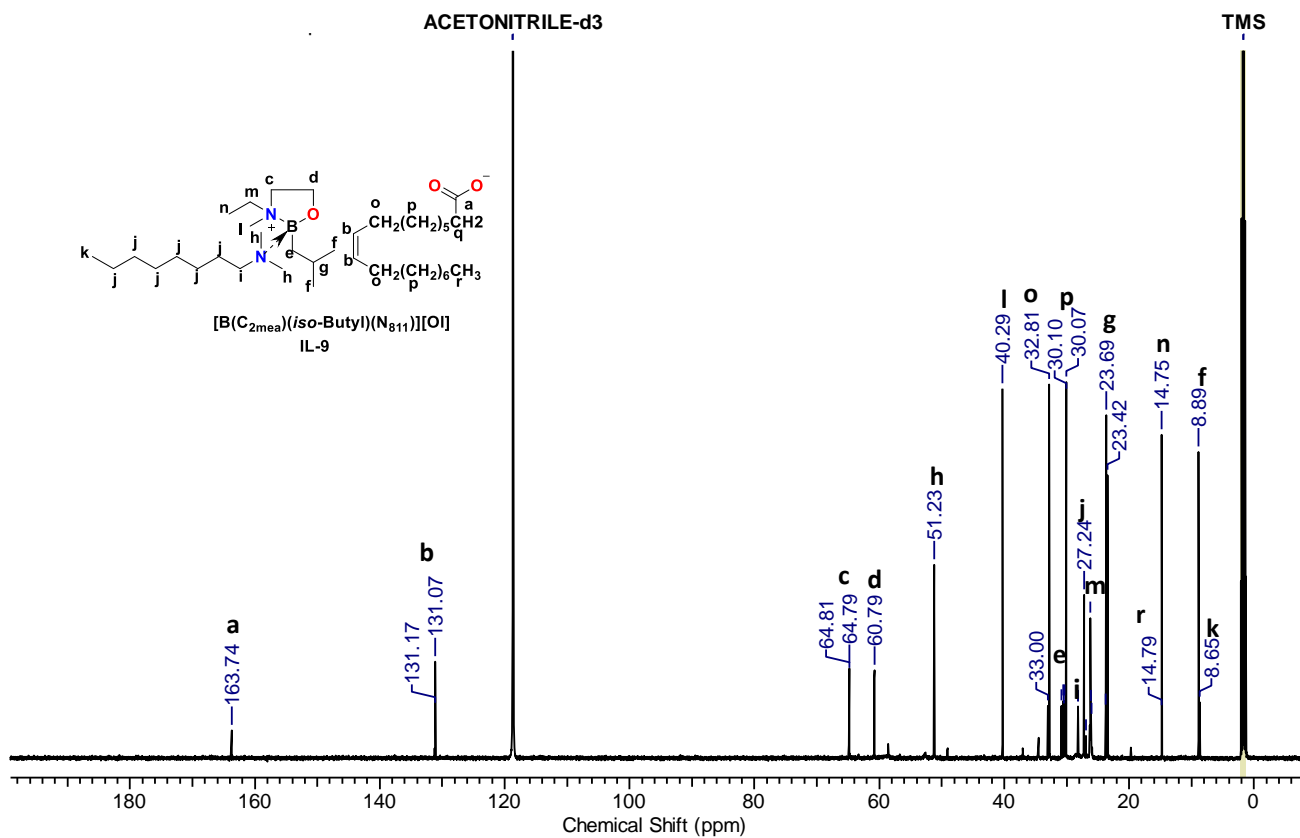

Figure S 50. <sup>13</sup>C NMR spectrum of IL-9 [B(C<sub>2</sub>mea)(*iso*-butyl)(N<sub>811</sub>)] [OI].

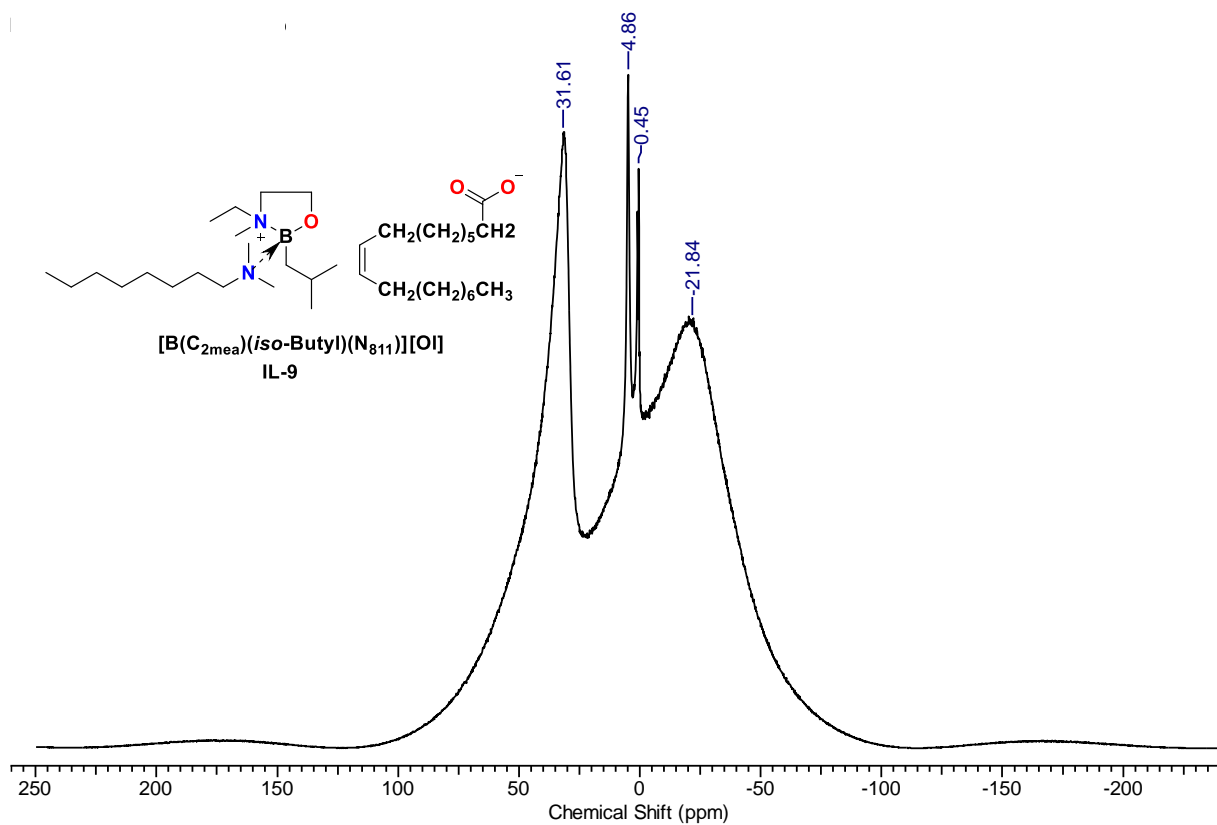

Figure S 51. <sup>11</sup>B NMR spectrum of IL-9 [B(C<sub>2</sub>mea)(*iso*-butyl)(N<sub>811</sub>)] [OI].

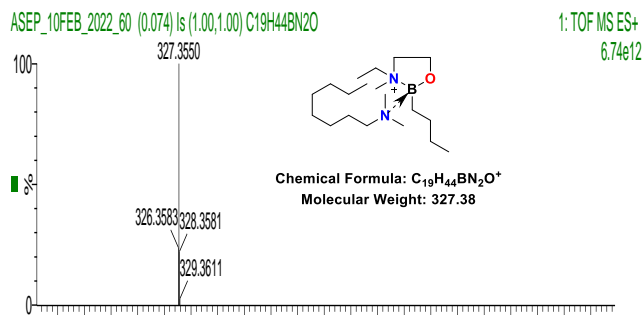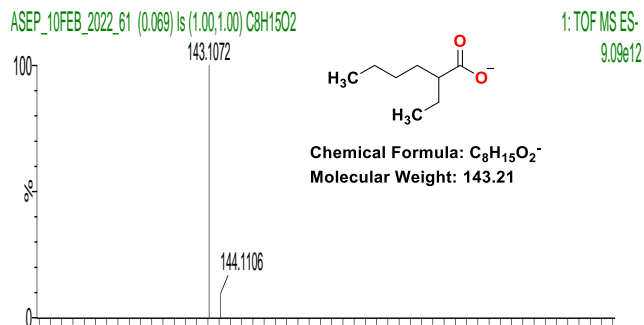

Figure S 52. Mass spectrum of IL-1 [B(C<sub>2</sub>mea)(*n*-butyl)(N<sub>811</sub>)] [EH].

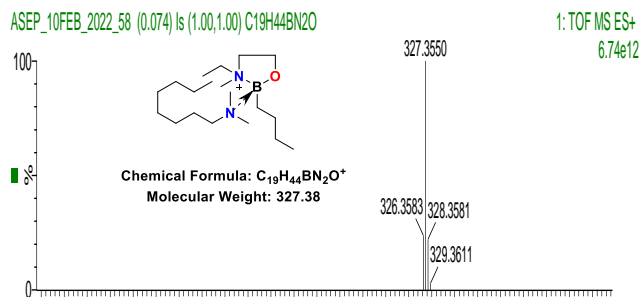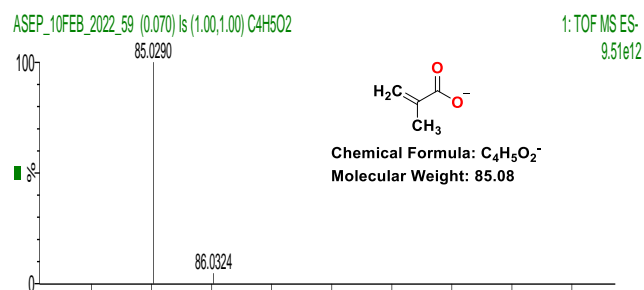

Figure S 53. Mass spectrum of IL-2 [B(C<sub>2</sub>mea)(*n*-butyl)(N<sub>811</sub>)] [MA].

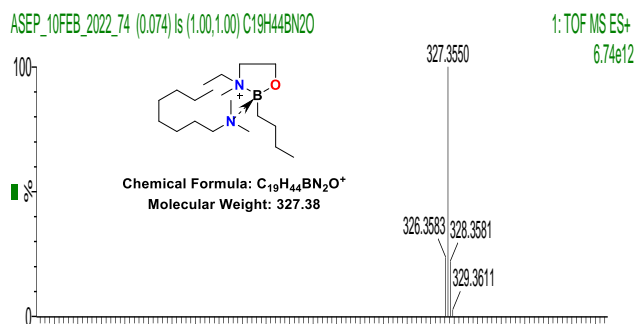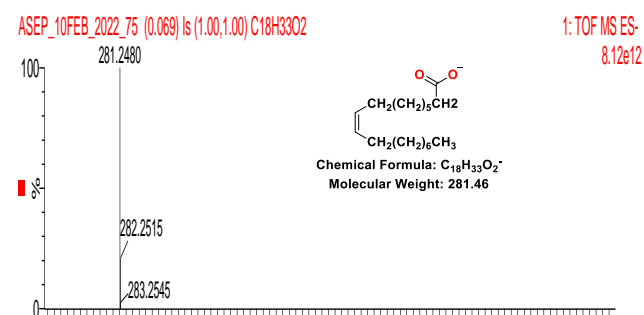

Figure S 54. Mass spectrum of IL-3 [B(C<sub>2</sub>mea)(*n*-butyl)(N<sub>811</sub>)] [OI].

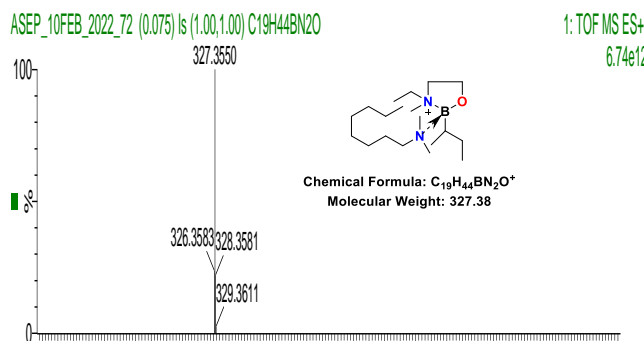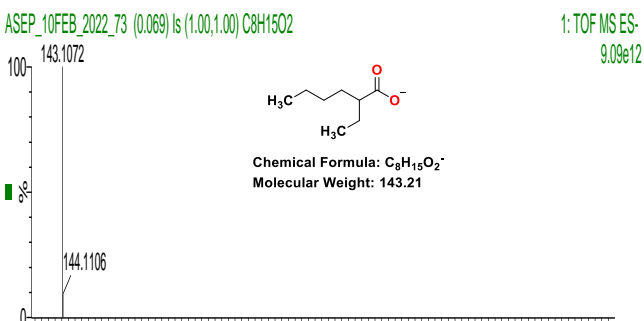

Figure S 55. Mass spectrum of IL-4 [B(C<sub>2</sub>mea)(*sec*-butyl)(N<sub>811</sub>)] [EH].

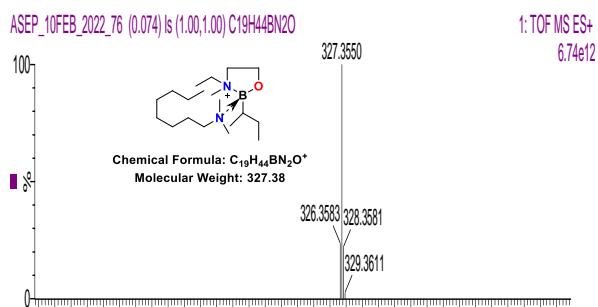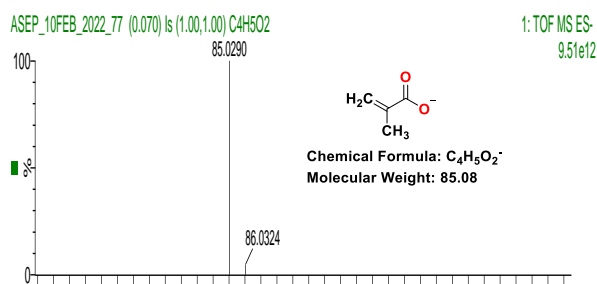

Figure S 56. Mass spectrum of IL-5 [B(C<sub>2</sub>mea)(*sec*-butyl)(N<sub>811</sub>)]+[MA].

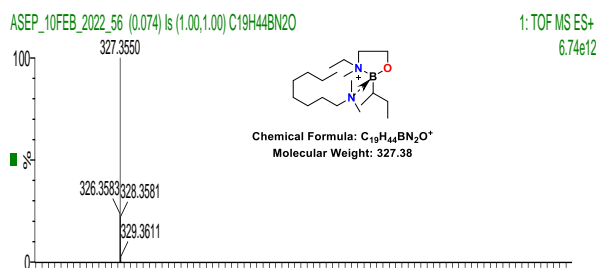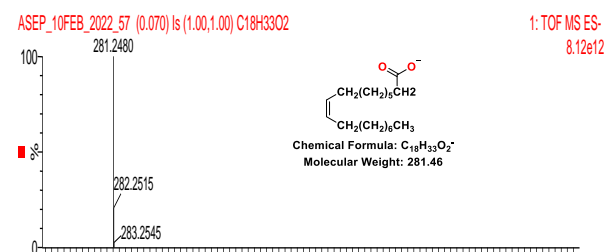

Figure S 57. Mass spectrum of IL-6 [B(C<sub>2</sub>mea)(*sec*-butyl)(N<sub>811</sub>)]+[OI].

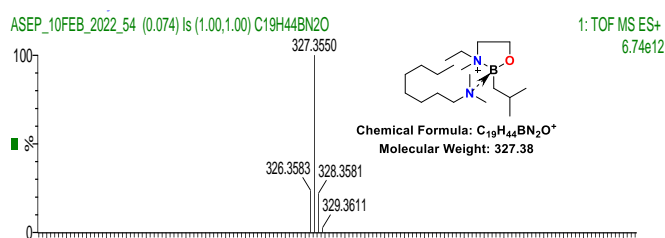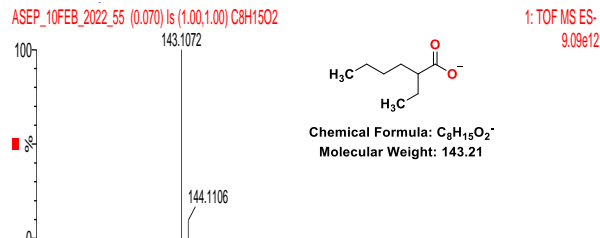

Figure S 58. Mass spectrum of IL-7 [B(C<sub>2</sub>mea)(*iso*-butyl)(N<sub>811</sub>)]+[EH].

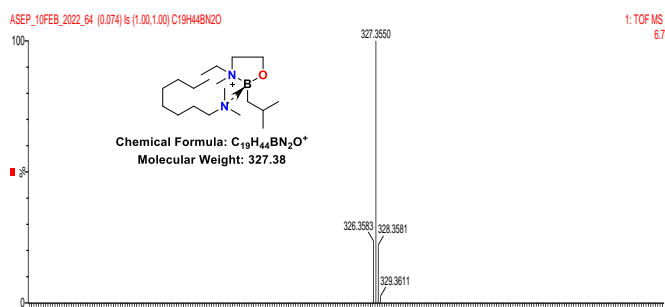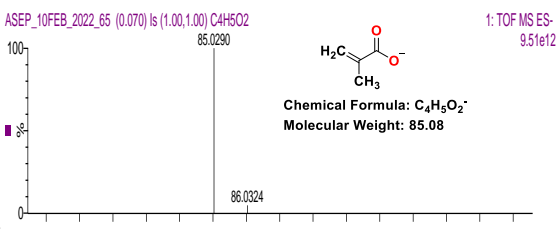

Figure S 59. Mass spectrum of IL-8 [B(C<sub>2</sub>mea)(*iso*-butyl)(N<sub>811</sub>)]+[MA].

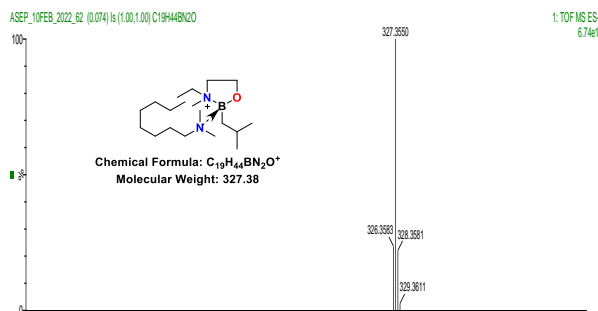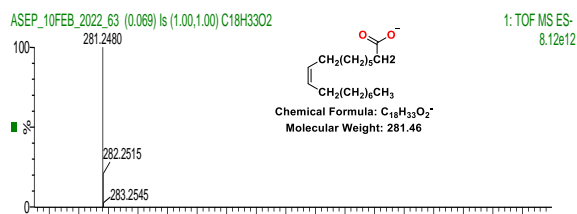

Figure S 60. Mass spectrum of IL-9 [B(C<sub>2</sub>mea)(*iso*-butyl) (N<sub>811</sub>)] [OI].

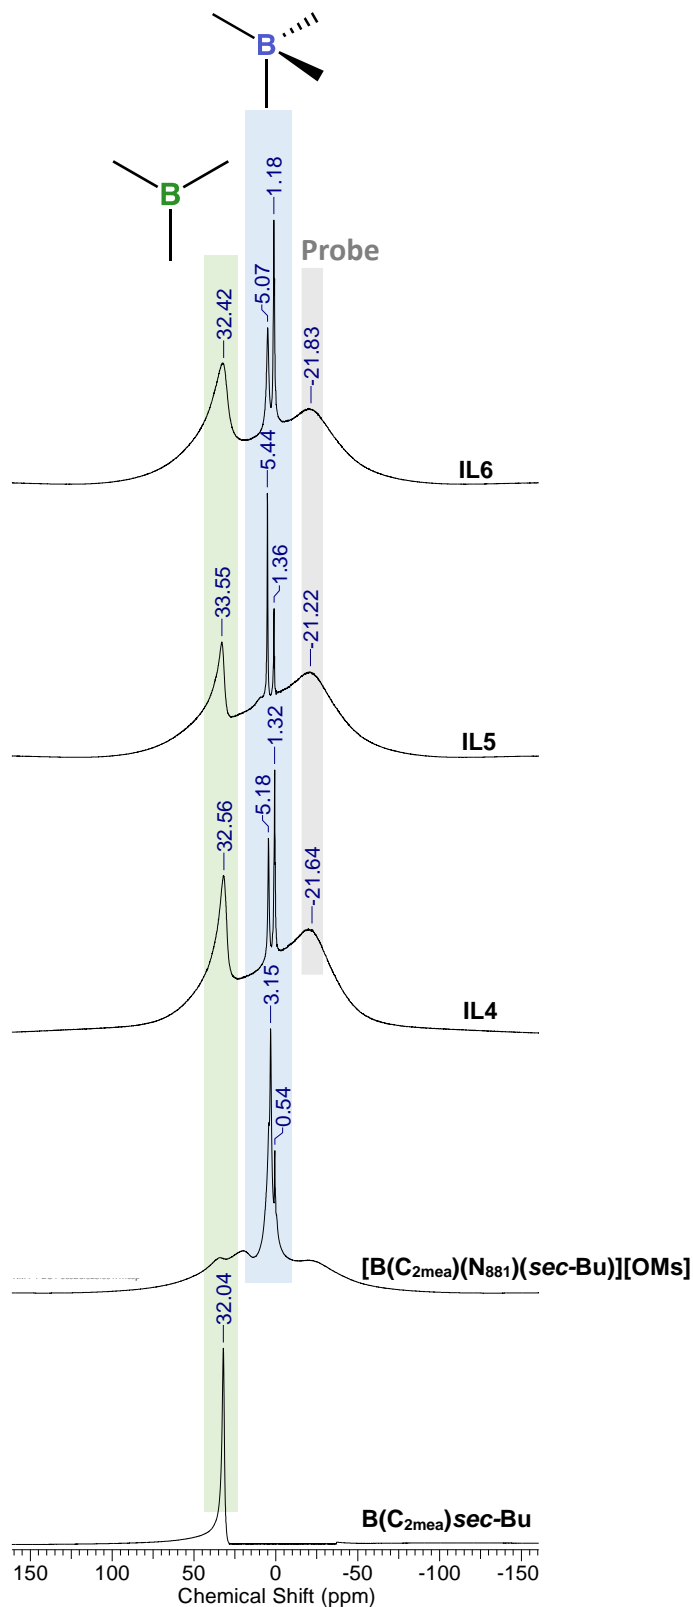

Figure S 61. <sup>11</sup>B NMR spectra of B(C<sub>2</sub>mea)(*sec*-Bu) and derived ILs: [B(C<sub>2</sub>mea)(*sec*-Bu)(N<sub>811</sub>)] [OMs], IL-4, IL-5 and IL-6. Green-shaded area designates the chemical shift regions of tricoordinate boron compounds while blue area designates tetracoordinate species.

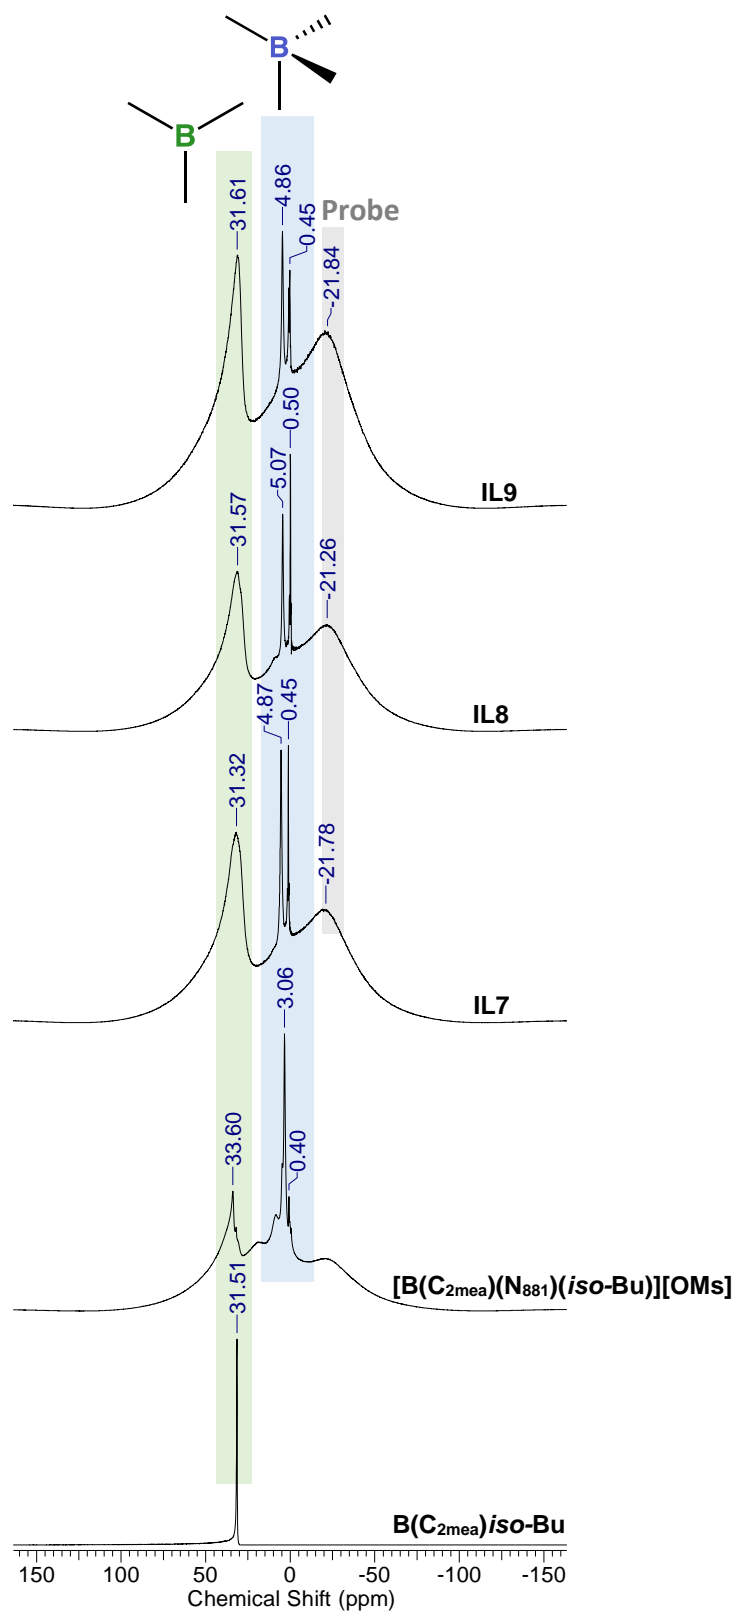

Figure S 62.  $^{11}B$  NMR spectra of  $B(C_{2mea})(iso-Bu)$  and derived ILs:  $[B(C_{2mea})(iso-Bu)(N_{811})][OMs]$ , IL-7, IL-8 and IL-9. Green-shaded area designates the chemical shift regions of tricoordinate boron compounds while blue area designates tetracoordinate species.



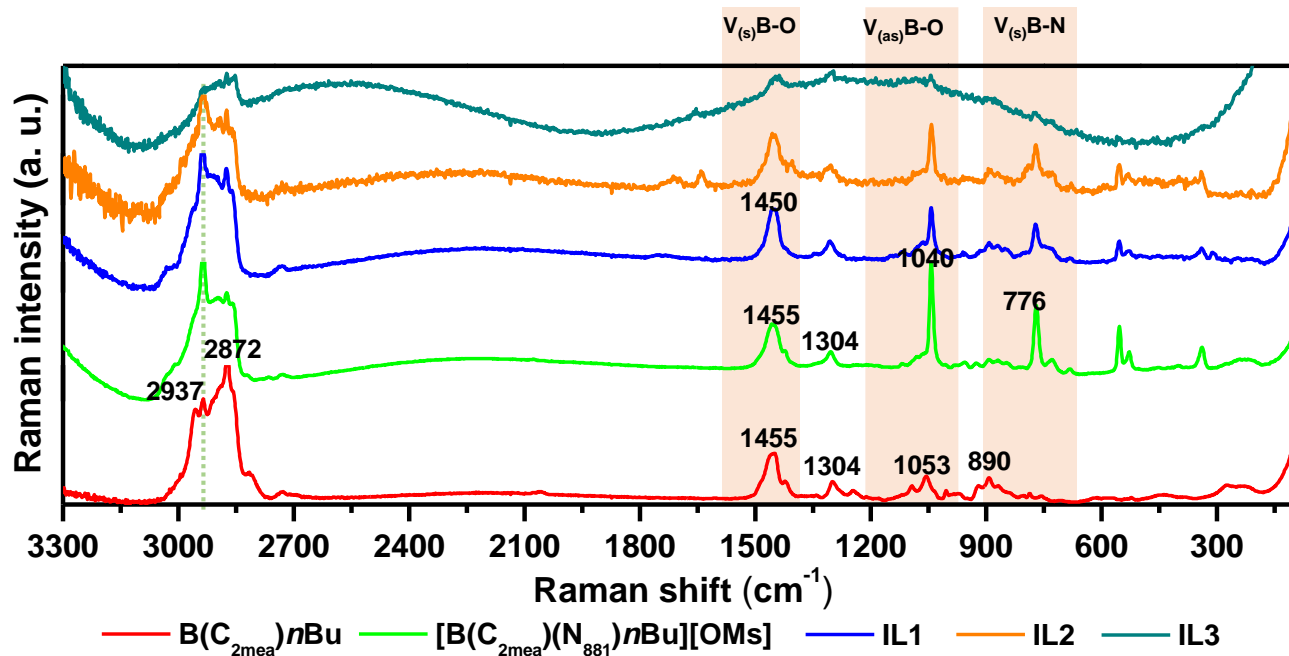

Figure S 63. Raman spectra of  $B(C_{2mea})(n-Bu)$  and the derived ILs:  $[B(C_{2mea})(n-Bu)(N_{811})][OMs]$ , IL-1, IL-2 and IL-3.

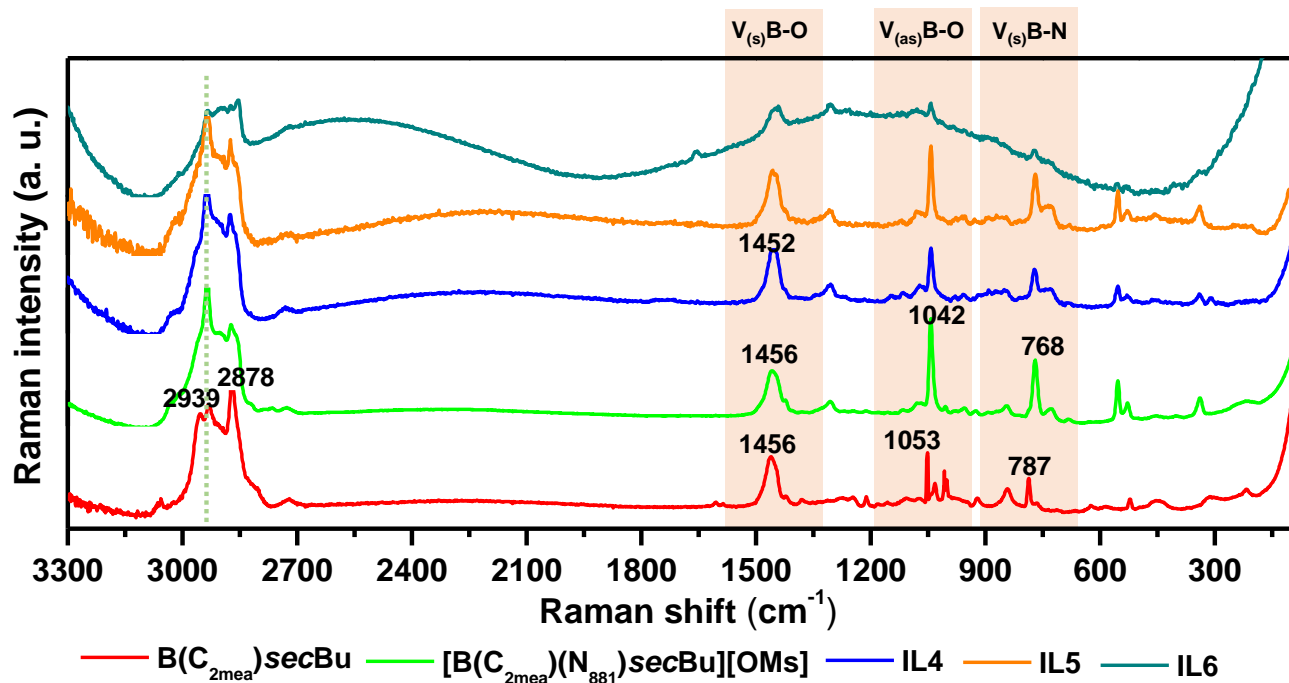

Figure S 64. Raman spectra of  $B(C_{2mea})(sec-Bu)$  and the derived ILs:  $[B(C_{2mea})(sec-Bu)(N_{811})][OMs]$ , IL-4, IL-5 and IL-6.

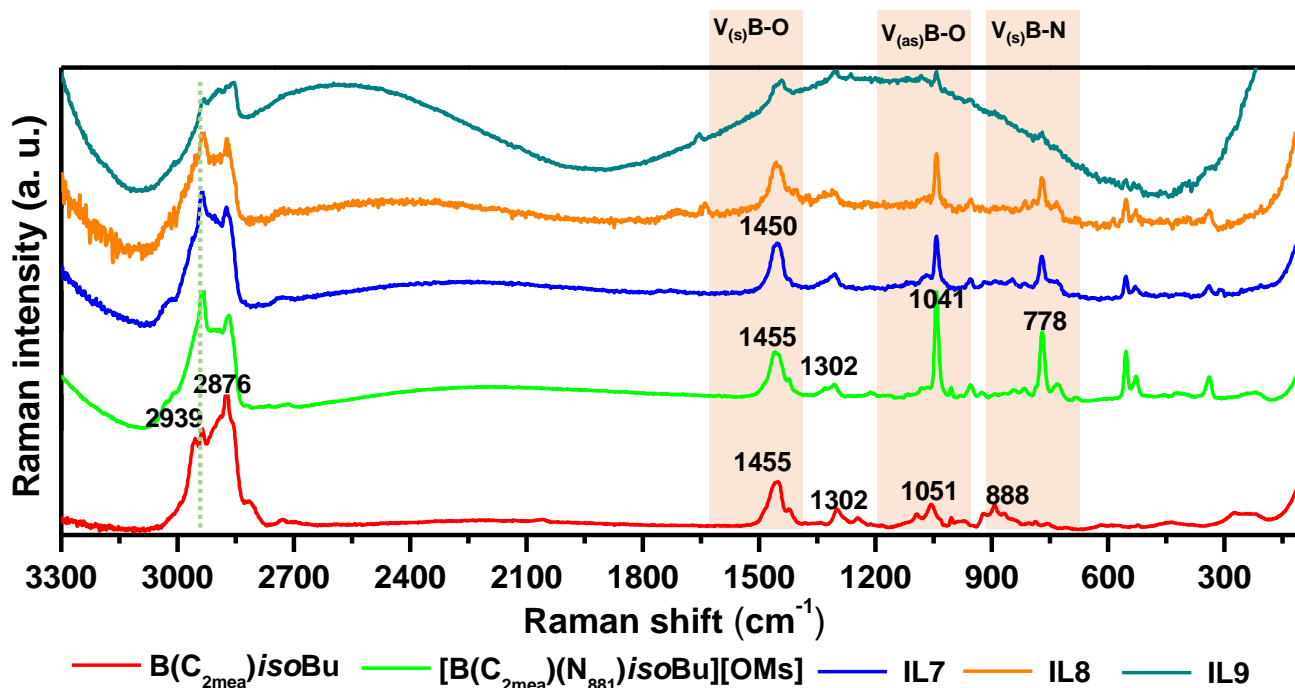

Figure S 65. Raman spectra of  $B(C_{2mea})(iso-Bu)$  and the derived ILs:  $[B(C_{2mea})(iso-Bu)(N_{811})][OMs]$ , IL-7, IL-8 and IL-9.

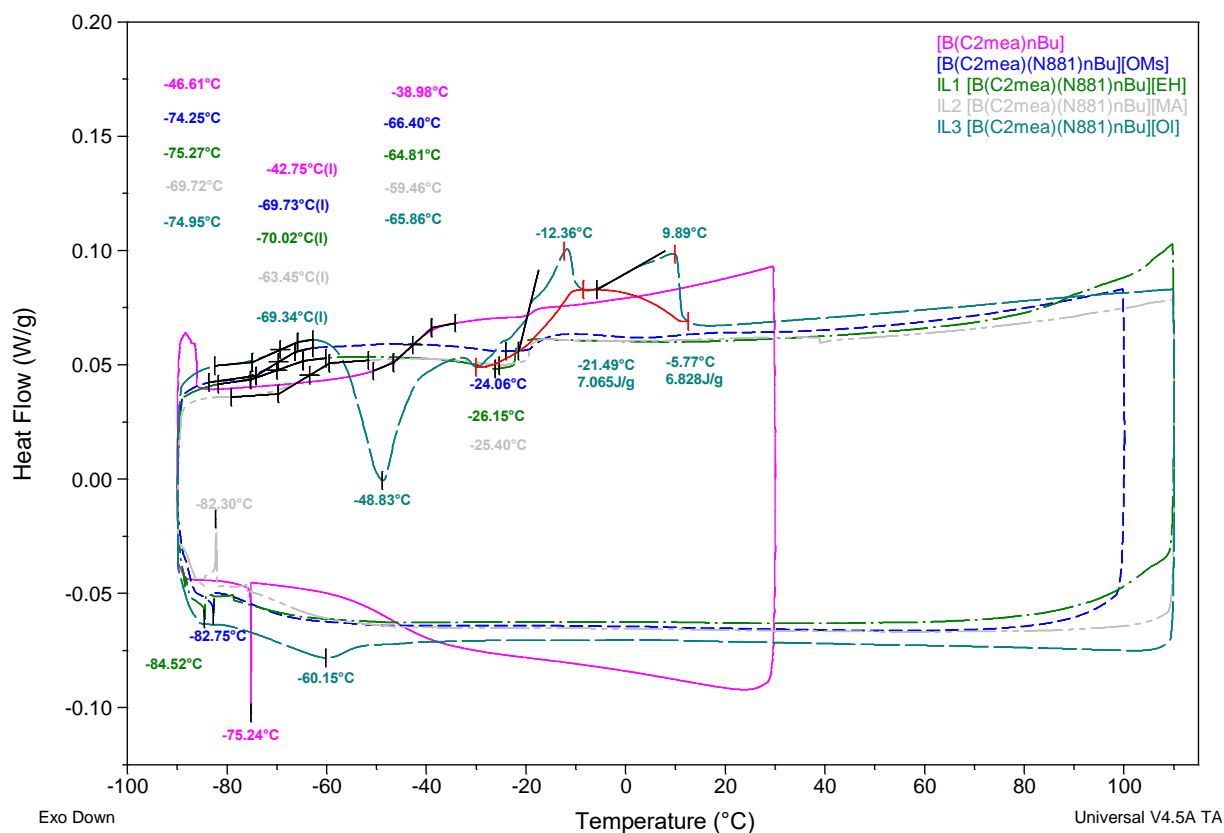

Figure S 66. DSC traces of neat of  $B(C_{2mea})nBu$ , and the derived ILs:  $[B(C_{2mea})(N_{811})nBu][OMs]$ , IL1, IL2 and IL3. Temperature scan rate:  $2\text{ }^{\circ}\text{C min}^{-1}$ . DSC trace from the second thermal cycle.

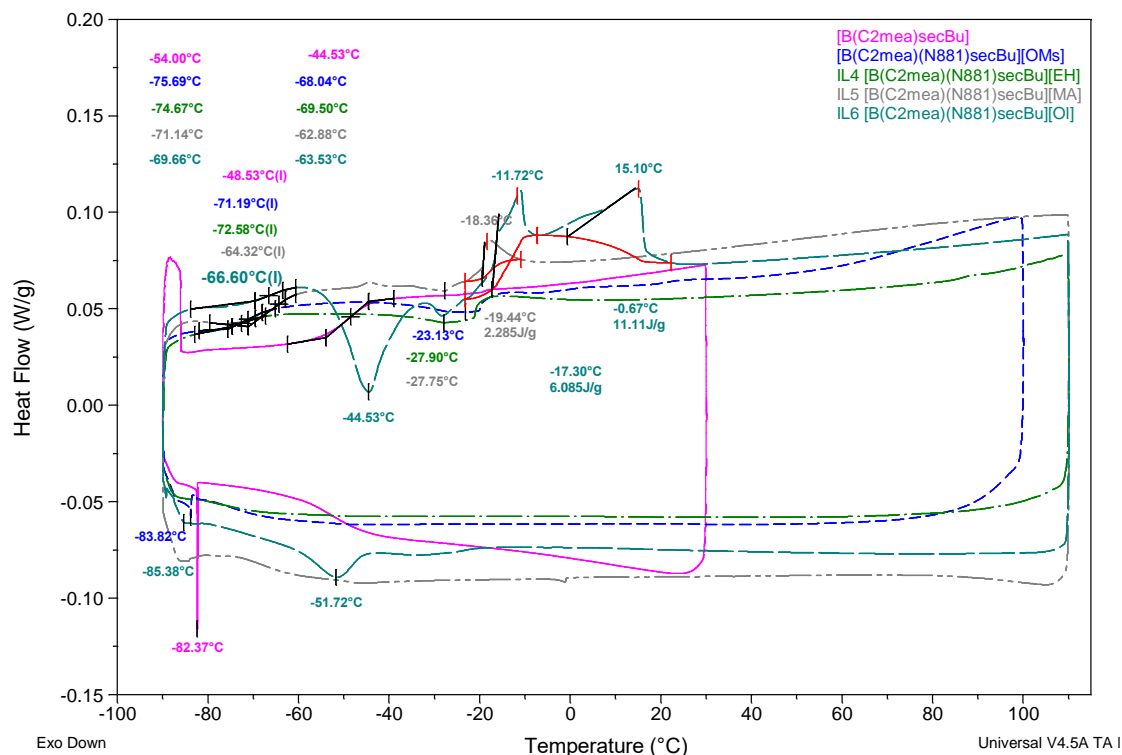

Figure S 67. DSC traces of neat of  $B(C_{2mea})secBu$ , and the derived ILs:  $[B(C_{2mea})(N_{811})secBu][OMs]$ , IL4, IL5 and IL6. Temperature scan rate:  $2\text{ }^{\circ}C\text{ min}^{-1}$ . DSC trace from the second thermal cycle.

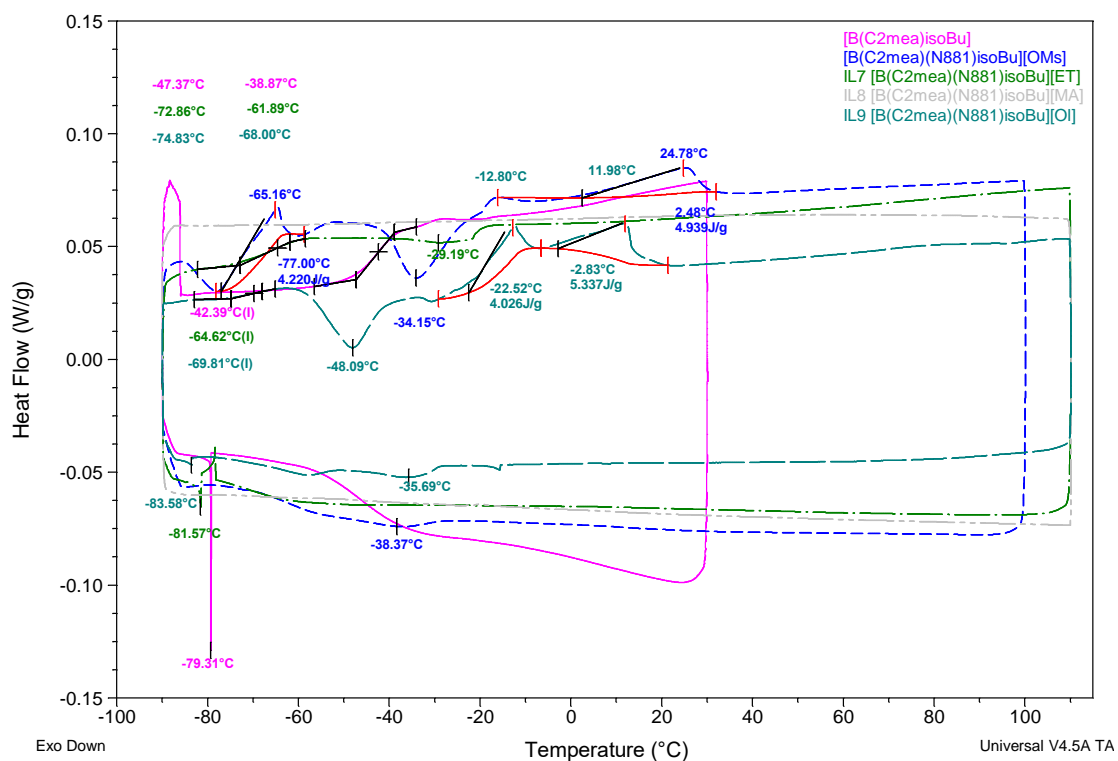

Figure S 68. DSC traces of neat of  $B(C_{2mea})isoBu$ , and the derived ILs:  $[B(C_{2mea})(N_{811})isoBu][OMs]$ , IL7, IL8 and IL9. Temperature scan rate:  $2\text{ }^{\circ}C\text{ min}^{-1}$ . DSC trace from the second thermal cycle.

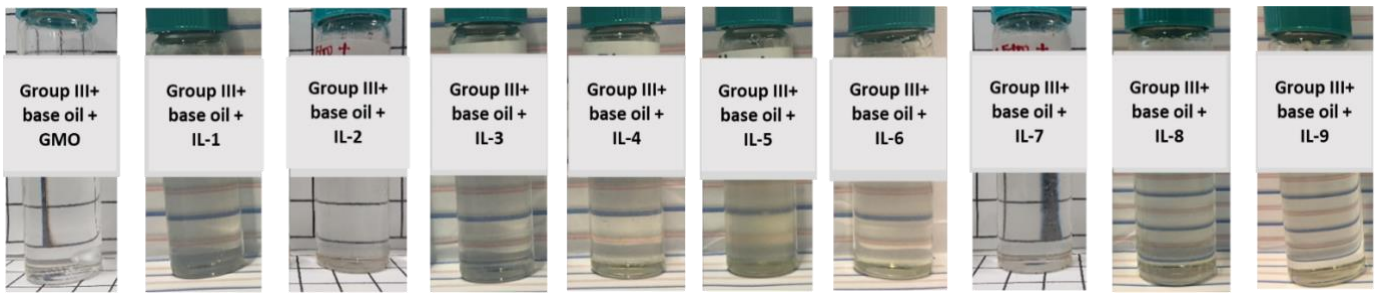

Figure S 69. Photograph of 9 boronium ILs in Group III+ base oil.

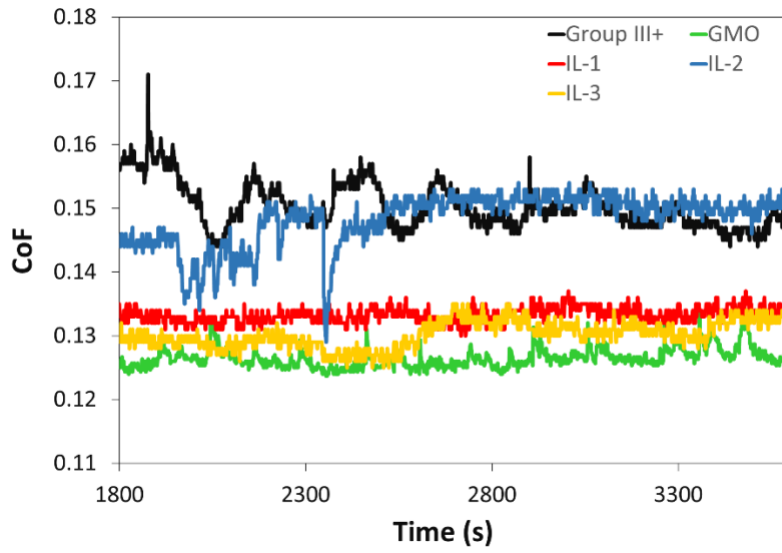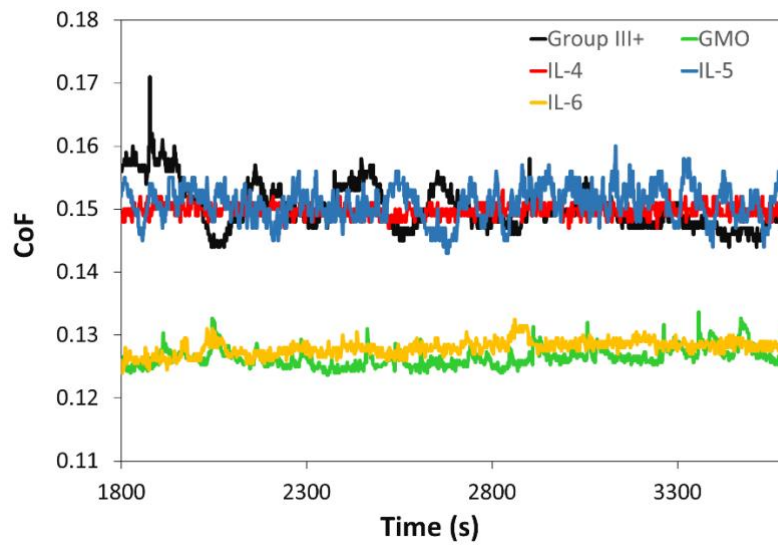

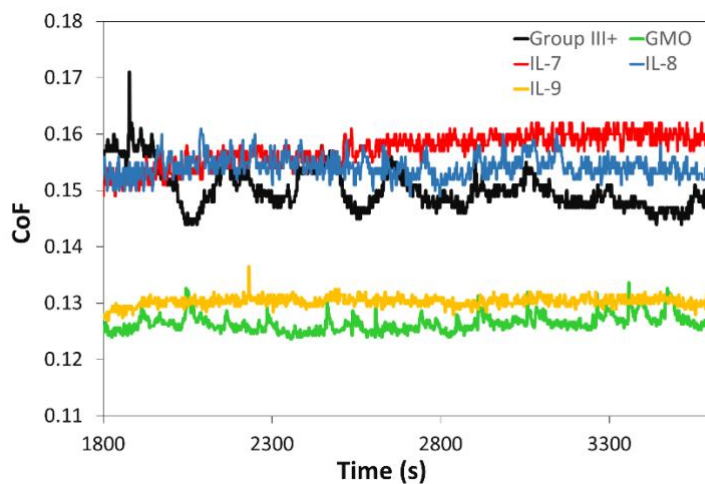

Figure S 70. Friction coefficient profile of Group III+ base oil and mixtures containing GMO and nine new boronium ILs at 1800 s test time and above

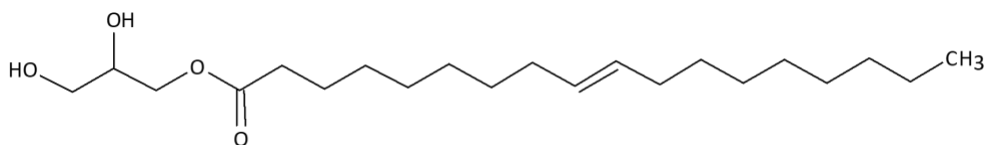

Figure S 71. Chemical structure of glycerol monooleate (GMO), a common type of friction modifier.

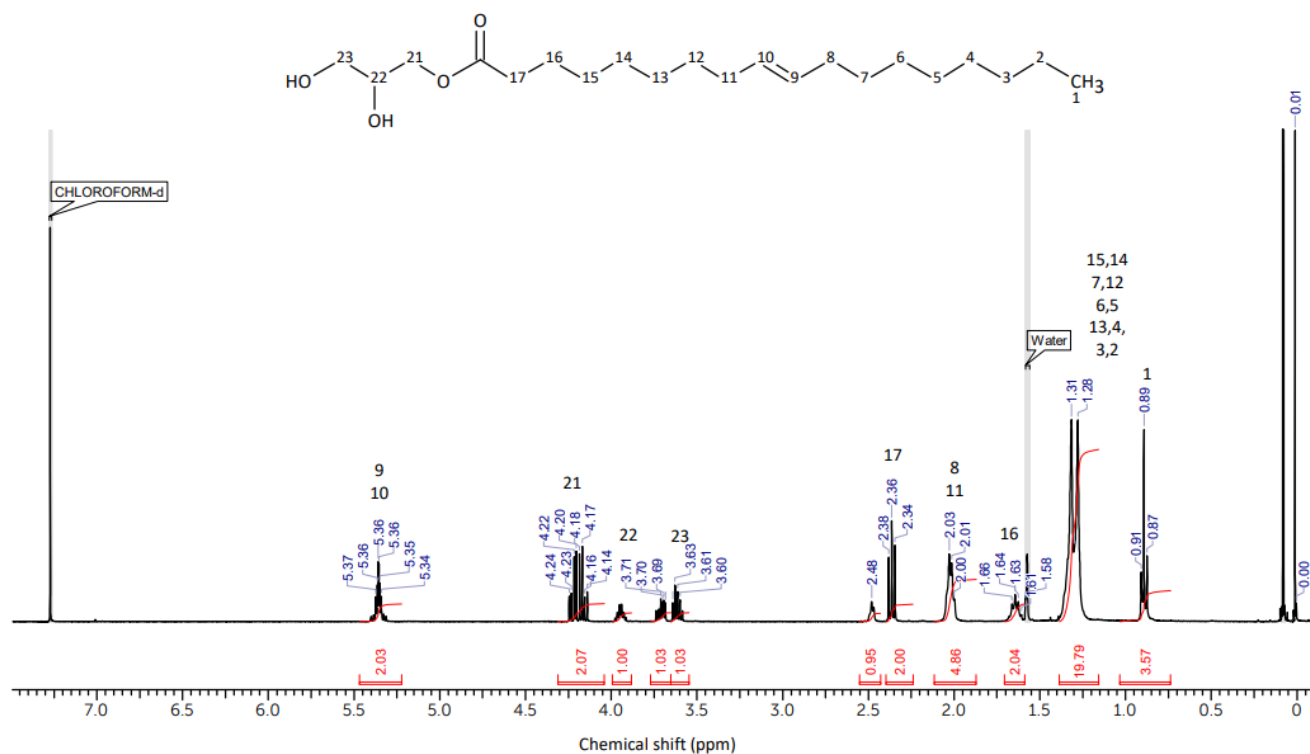

Figure S 72. <sup>1</sup>H NMR (400 MHz) spectrum of glycerol monooleate (GMO).

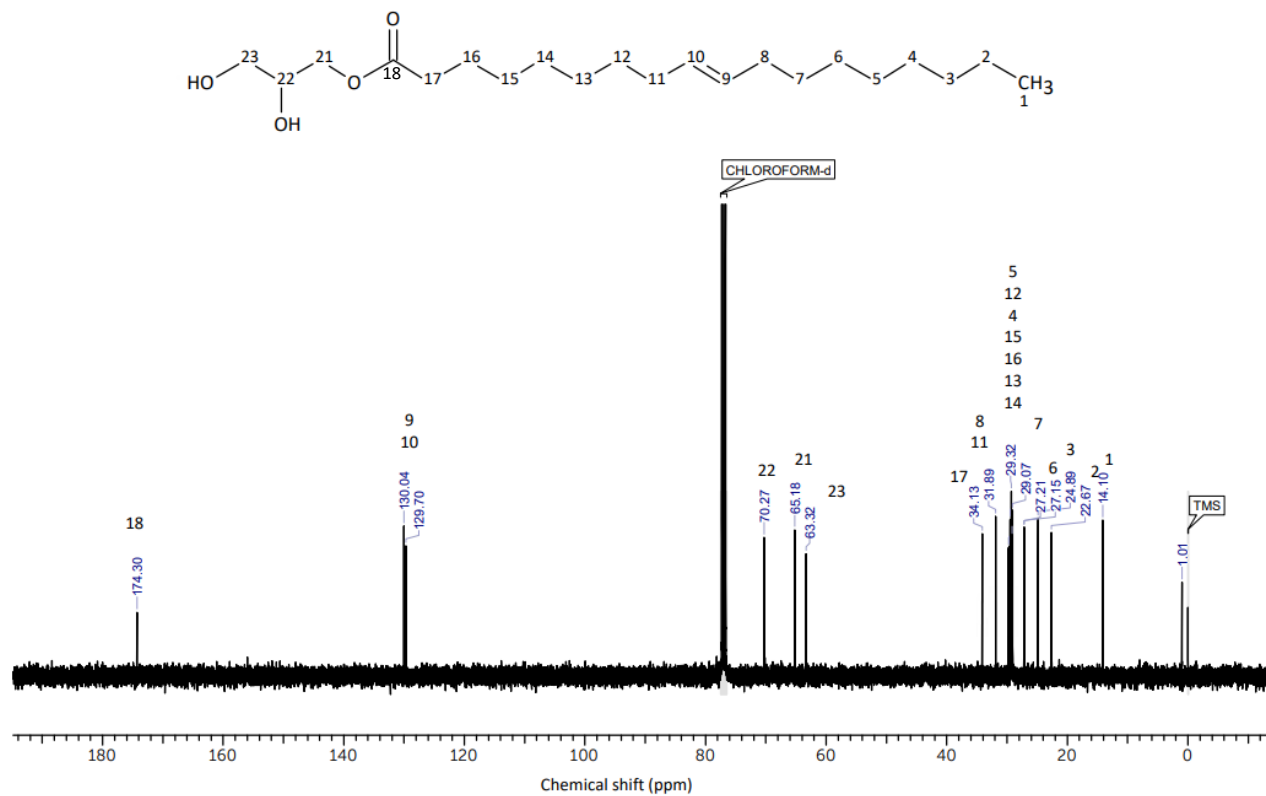

Figure S 73. <sup>13</sup>C NMR spectrum of glycerol monooleate (GMO).
